# Supplementary material for: Improving a Synechocystis-based photoautotrophic chassis through systematic genome mapping and validation of neutral sites
Source: PubMed Central journal article supplement — DNA Res. 2015 Oct 21;22(6):425–37. doi: 10.1093/dnares/dsv024 (PMC4675711; doi:10.1093/dnares/dsv024), 2015-10-21
Supplement: supp_dsv024_dsv024supp.pdf [file supp_dsv024_dsv024supp.pdf]

## Improving a *Synechocystis*-based photoautotrophic chassis through systematic genome mapping and validation of neutral sites

Filipe Pinto, Catarina C. Pacheco, Paulo Oliveira, Arnau Montagud, Andrew Landels, Narciso Couto, Phillip C. Wright, Javier F. Urchueguía and Paula Tamagnini

**Supplementary Table S1.** Primers used for RT-PCR analysis

| Primer name | Sequence 5' → 3'        | Amplicon size (bp) |
|-------------|-------------------------|--------------------|
| N1F         | CATGGATTGAAGGAAGGG      | 100                |
| N1R         | TTTGGTGAACAATTAATGAAC   |                    |
| N3F         | GCAGTCCCTCCTCCAAAC      | 129                |
| N3R         | AAGCCGATATTCAGGTAAGATG  |                    |
| N5F         | GGAAGTGTGTTGCTGTC       | 232                |
| N5R         | GCCTTCGCCGTAGATTG       |                    |
| N6F         | AAGGTAATCAAGCAGAAATG    | 217                |
| N6R         | ATTGGTAACAGCACTTCC      |                    |
| N7F         | TGACTGTAAGCAATCTACC     | 500                |
| N7R         | ACTAACGATGGAATCTTGG     |                    |
| N8F         | AACTTAACTTCTATTCGTGAG   | 231                |
| N8R         | GAAACCTTGATAAGCAGTC     |                    |
| N10F        | GATATTGATGTGTATTGC      | 478                |
| N10R        | TTATTATCTTCTGTCTCC      |                    |
| N11F        | TGAATACCACATCTCCCATTGAC | 200                |
| N11R        | TTAACCTGCTGGCGTGAC      |                    |
| N12F        | TTCTCACCGCTACTGTTAC     | 227                |
| N12R        | CACTTCTCGCACTAATTCG     |                    |
| N13F        | CCCAAATGATGACCGAAG      | 216                |
| N13R        | CTAGTAACTGCTGTTCTC      |                    |
| N14F        | AAGTGTCCAAAGCCAAAC      | 270                |
| N14R        | TCAACAATGCCATCTTCC      |                    |
| N15F        | TTAATTGCCACTGCCTTAC     | 293                |
| N15R        | TAGAGACAGCGGATATGC      |                    |
| N16F        | TGATGTGGACGAGGATAC      | 335                |
| N16R        | GGGCTAAGGGAATATGGG      |                    |

**Supplementary Table S2.** Other primers used in this work

| Primer name         | Sequence 5' → 3' <sup>a</sup>                                          | Purpose                                                       |
|---------------------|------------------------------------------------------------------------|---------------------------------------------------------------|
| Km.KmScFwd          | CTGAC <u>CCCGGG</u> TGAATGTCAGCTACTGG                                  | Selection cassettes amplification                             |
| KmRev               | CAAAC <u>CCCGGG</u> CGATTTACTTTTCGACCTC                                |                                                               |
| KmScRev             | ACAGAC <u>CCCGGG</u> CAAGCGGATGGCTGATG                                 |                                                               |
| N5.50 <sup>b</sup>  | GCGGC <u>CTCGAG</u> TGGGGGCATCTGCTAGGCAATATTTG                         | Amplification of the DNA fragments flanking the neutral sites |
| N5.5I               | GATTACAC <u>CCCGGG</u> TGTAATCGGTTGATTATTTTCAGTGGCCCCGGCCGATGGATAATTAC |                                                               |
| N5.30 <sup>b</sup>  | GTCCAAATCAGCATTGCTCTGCCAGGTGAGAC                                       |                                                               |
| N5.3I               | GATTACAC <u>CCCGGG</u> TGTAATCCTGAAGCCTTGACAATCCCCGTTGGTGATTTATACTTAG  |                                                               |
| N8.50 <sup>b</sup>  | GAACA <u>CTCGAG</u> TGCCAGCAACGACAATG                                  |                                                               |
| N8.5I               | GATTACAC <u>CCCGGG</u> TGTAATCCTTCATTCCCTATTGTTATTAATAGTCTC            |                                                               |
| N8.30 <sup>b</sup>  | GATGACCGCTGGCGGAGTTTAGTCCAG                                            |                                                               |
| N8.3I               | GATTACAC <u>CCCGGG</u> TGTAATCTTGTCACCAATTTTTGTAGGGATGTTGGCTAAATTG     |                                                               |
| N10.50 <sup>b</sup> | GATAA <u>CTCGAG</u> TGCCCCGGTGGATTTAATGC                               |                                                               |
| N10.5I              | GATTACAC <u>CCCGGG</u> TGTAATCCCATACTCAGCCTTCTAATGCTGAGAGAATG          |                                                               |
| N10.30 <sup>b</sup> | GGACTGACCCAAGATACAGTGGTAG                                              |                                                               |
| N10.3I              | GATTACAC <u>CCCGGG</u> TGTAATCCGAGCGCAAACACTACAATGCGCTTCGTTGC          |                                                               |
| N15.50 <sup>b</sup> | GGTT <u>CTCGAG</u> CCGCTGAATTTAGTCAACATCG                              |                                                               |
| N15.5I              | GATTACAC <u>CCCGGG</u> TGTAATCCATTGGGCACGAGAGTTAGTAAGGCAGTG            |                                                               |
| N15.30 <sup>b</sup> | CTAAACTTACGGCATTGGCATCAACGGGAG                                         |                                                               |
| N15.3I              | GATTACAC <u>CCCGGG</u> TGTAATCTCTTTACAATGGCCAGGTCTTTAGGGA GCGGTGAC     |                                                               |
| N16.50 <sup>b</sup> | GA <u>ACTCGAG</u> TAGTAACCACAGGCTTTTG                                  |                                                               |
| N16.5I              | GATTACAC <u>CCCGGG</u> TGTAATCGCTGGAGGCGAACTGGGTGAGAACCAAT             |                                                               |
| N16.30 <sup>b</sup> | GTGAGCTTGATGGTGATGGTGGGTAAAG                                           |                                                               |
| N16.3I              | GATTACAC <u>CCCGGG</u> TGTAATCTGCTGGCTTTGTTGCCCTGTCAACCAAGTTC          |                                                               |
| N5_SDM              | CGAGGCGATCGCCAGTTGGAAGAATTGGCC                                         | Site directed mutagenesis                                     |
| N10_SDM             | CTAAAAAGACAAGTCTGTGGCTAGTTACTATGACGAGGC                                |                                                               |
| N5.FO               | TCCTGGTAACTCACGCTATC                                                   | Mutants confirmation by PCR                                   |
| N5.FI               | AGCCGATCCAGGGAAGTGTGTTG                                                |                                                               |
| N5.RI               | CCATCGTCCTTCGCCGTAGATTGTG                                              |                                                               |
| N8.FO               | CCCAGTTAAACTGCGAAAGG                                                   |                                                               |
| N8.FI               | TCGCCAAGCTTTCAGAAC                                                     |                                                               |
| N8.RI               | CAAACCTCCAGCCGATAAC                                                    |                                                               |
| N10.FO              | CCGGTTGCCCTTATCGGAACCGATG                                              |                                                               |
| N10.FI              | GCTATGGCGTCACTTGTAGC                                                   |                                                               |
| N10.RI              | TTTGCGACCCATCGGATTGC                                                   |                                                               |
| N15.FO              | CTCCAAGGCGACTACCTTC                                                    |                                                               |
| N15.FI              | CCCAGTGGGAATGCGATCAG                                                   |                                                               |

|               |                                  |                                |
|---------------|----------------------------------|--------------------------------|
| <b>N15.RI</b> | <u>TAGGAGGGCGATCACCGAAG</u>      |                                |
| <b>N16.FO</b> | <u>ACCCATTTCTTGGGTGTAGG</u>      | Mutants confirmation<br>by PCR |
| <b>N16.FI</b> | <u>GGCCTTGGTTGCCCTGACTGATGTG</u> |                                |
| <b>N16.RI</b> | <u>GACCGATCGCCGCAGTAGTTCTTGG</u> |                                |
| <b>GFP.F</b>  | <u>TCTTGTTGAATTAGATGGTG</u>      | RT-PCR/RT-qPCR                 |
| <b>GFP.R</b>  | <u>TGTGAGTTATAGTTGTATTCC</u>     |                                |

<sup>a</sup>Restriction sites underlined

<sup>b</sup>Primers used to confirm genomic integrations and mutants full segregation.

**Supplementary Table S3.** List of the putative neutral sites identified

| Site name | ORF ID         | Chromosome position | Orientation <sup>a</sup> | Length of the putatively encoded protein (amino acids) |
|-----------|----------------|---------------------|--------------------------|--------------------------------------------------------|
| N1        | <i>ssl0606</i> | 2441925 - 2442083   | c                        | 52                                                     |
| N2        | <i>slr0368</i> | 2365848 - 2366120   | d                        | 90                                                     |
| N3        | <i>ssl0318</i> | 2302457 - 2302645   | c                        | 62                                                     |
| N4        | <i>ssr0680</i> | 2684766 - 2684990   | d                        | 74                                                     |
| N5        | <i>sll1476</i> | 3398409 - 3398717   | c                        | 102                                                    |
| N6        | <i>slr1869</i> | 1212609 - 1213358   | d                        | 249                                                    |
| N7        | <i>sll0494</i> | 3224429 - 3225334   | c                        | 301                                                    |
| N8        | <i>slr0573</i> | 2816517 - 2816960   | d                        | 147                                                    |
| N9        | <i>sll0181</i> | 2737929 - 2738552   | c                        | 207                                                    |
| N10       | <i>slr1396</i> | 707437 - 708054     | d                        | 205                                                    |
| N11       | <i>ssr1038</i> | 2950107 - 2950343   | d                        | 78                                                     |
| N12       | <i>ssl3615</i> | 776058 - 776342     | c                        | 94                                                     |
| N13       | <i>slr0587</i> | 3536090 - 3536422   | d                        | 110                                                    |
| N14       | <i>sll0167</i> | 2317536 - 2318030   | c                        | 164                                                    |
| N15       | <i>slr0271</i> | 1524568 - 1525086   | d                        | 172                                                    |
| N16       | <i>slr0397</i> | 2146801 - 2147376   | d                        | 191                                                    |

<sup>a</sup> d – direct sequence, c – complement sequence.

**Supplementary Table S4.** ANOVA analysis of *Synechocystis* wild-type growth compared to the SNnK mutants. *P*-values of up to second order interactions are shown.

| Parameters            | Mutants                |                        |                        |                        |                        |
|-----------------------|------------------------|------------------------|------------------------|------------------------|------------------------|
|                       | SN5K                   | SN8K                   | SN10K                  | SN15K                  | SN16K                  |
| Light                 | 1.61x10 <sup>-38</sup> | 3.47x10 <sup>-37</sup> | 8.70x10 <sup>-34</sup> | 1.58x10 <sup>-33</sup> | 5.28x10 <sup>-39</sup> |
| Glucose               | 1.49x10 <sup>-11</sup> | 3.62x10 <sup>-22</sup> | 8.48x10 <sup>-19</sup> | 2.54x10 <sup>-12</sup> | 3.50x10 <sup>-25</sup> |
| Mutation <sup>a</sup> | 4.58x10 <sup>-15</sup> | 1.24x10 <sup>-04</sup> | 8.65x10 <sup>-03</sup> | 3.37x10 <sup>-01</sup> | 3.48x10 <sup>-01</sup> |
| Light + Glucose       | 2.57x10 <sup>-10</sup> | 1.36x10 <sup>-14</sup> | 3.62x10 <sup>-18</sup> | 6.46x10 <sup>-20</sup> | 9.58x10 <sup>-16</sup> |
| Light + Mutation      | 1.74x10 <sup>-03</sup> | 4.51x10 <sup>-04</sup> | 1.04x10 <sup>-01</sup> | 5.27x10 <sup>-01</sup> | 7.76x10 <sup>-02</sup> |
| Glucose + Mutation    | 1.74x10 <sup>-07</sup> | 1.00x10 <sup>-01</sup> | 1.20x10 <sup>-01</sup> | 1.44x10 <sup>-04</sup> | 1.30x10 <sup>-01</sup> |

<sup>a</sup>The statistical analysis of the effect produced by each mutation introduced is highlighted in grey.

**Supplementary Table S5.** iTRAQ samples labelling and experimental design

| <b>Label</b> | <b>iTRAQ a</b> | <b>iTRAQ b</b>   |
|--------------|----------------|------------------|
| <b>113</b>   |                | WT1 <sup>a</sup> |
| <b>114</b>   |                | WT2 <sup>a</sup> |
| <b>115</b>   | SN15K.Cgfp1    | SN5K.Cgfp1       |
| <b>116</b>   | SN15K.Cgfp2    | SN5K.Cgfp2       |
| <b>117</b>   | SN16K.Cgfp1    | SN8K.Cgfp1       |
| <b>118</b>   | SN16K.Cgfp2    | SN8K.Cgfp2       |
| <b>119</b>   | SN15K.gfp1     | SN10K.Cgfp1      |
| <b>121</b>   | SN15K.gfp2     | SN10K.Cgfp2      |

<sup>a</sup>Samples common to both iTRAQ experiments

**Supplementary Table S6.** List of plasmids constructed in this work

| Plasmid name | Description                                                                                                                                                          |
|--------------|----------------------------------------------------------------------------------------------------------------------------------------------------------------------|
| pSN5         | pGEM-T easy vector containing the BioBrick compatible interface flanked by the two regions for double homologous recombination on neutral site N5.                   |
| pSN8         | pGEM-T easy vector containing the BioBrick compatible interface flanked by the two regions for double homologous recombination on neutral site N8.                   |
| pSN10        | pGEM-T easy vector containing the BioBrick compatible interface flanked by the two regions for double homologous recombination on neutral site N10.                  |
| pSN15        | pGEM-T easy vector containing the BioBrick compatible interface flanked by the two regions for double homologous recombination on neutral site N15.                  |
| pSN16        | pGEM-T easy vector containing the BioBrick compatible interface flanked by the two regions for double homologous recombination on neutral site N16.                  |
| pSN5K        | pSN5 plasmid with the kanamycin resistance cassette cloned upstream of the BioBrick compatible interface.                                                            |
| pSN8K        | pSN8 plasmid with the kanamycin resistance cassette cloned upstream of the BioBrick compatible interface.                                                            |
| pSN10K       | pSN10 plasmid with the kanamycin resistance cassette cloned upstream of the BioBrick compatible interface.                                                           |
| pSN15K       | pSN15 plasmid with the kanamycin resistance cassette cloned upstream of the BioBrick compatible interface.                                                           |
| pSN16K       | pSN16 plasmid with the kanamycin resistance cassette cloned upstream of the BioBrick compatible interface.                                                           |
| pSN5KS       | pSN5 plasmid with the kanamycin resistance/sucrose sensitivity cassette cloned upstream of the BioBrick compatible interface.                                        |
| pSN8KS       | pSN8 plasmid with the kanamycin resistance/sucrose sensitivity cassette cloned upstream of the BioBrick compatible interface.                                        |
| pSN10KS      | pSN10 plasmid with the kanamycin resistance/sucrose sensitivity cassette cloned upstream of the BioBrick compatible interface.                                       |
| pSN15KS      | pSN15 plasmid with the kanamycin resistance/sucrose sensitivity cassette cloned upstream of the BioBrick compatible interface.                                       |
| pSN16KS      | pSN16 plasmid with the kanamycin resistance/sucrose sensitivity cassette cloned upstream of the BioBrick compatible interface.                                       |
| pSN5K.gfp    | pSN5K plasmid with the GFP generator BioBrick BBa_E0240 cloned in the BioBrick compatible interface.                                                                 |
| pSN8K.gfp    | pSN8K plasmid with the GFP generator BioBrick BBa_E0240 cloned in the BioBrick compatible interface.                                                                 |
| pSN10K.gfp   | pSN10K plasmid with the GFP generator BioBrick BBa_E0240 cloned in the BioBrick compatible interface.                                                                |
| pSN15K.gfp   | pSN15K plasmid with the GFP generator BioBrick BBa_E0240 cloned in the BioBrick compatible interface.                                                                |
| pSN16K.gfp   | pSN16K plasmid with the GFP generator BioBrick BBa_E0240 cloned in the BioBrick compatible interface.                                                                |
| pSN5K.Cgfp   | pSN5K plasmid with the GFP generator BioBrick BBa_E0240 under the control of a constitutive promoter ( $P_{psbA2'}$ ), cloned in the BioBrick compatible interface.  |
| pSN8K.Cgfp   | pSN8K plasmid with the GFP generator BioBrick BBa_E0240 under the control of a constitutive promoter ( $P_{psbA2'}$ ), cloned in the BioBrick compatible interface.  |
| pSN10K.Cgfp  | pSN10K plasmid with the GFP generator BioBrick BBa_E0240 under the control of a constitutive promoter ( $P_{psbA2'}$ ), cloned in the BioBrick compatible interface. |
| pSN15K.Cgfp  | pSN15K plasmid with the GFP generator BioBrick BBa_E0240 under the control of a constitutive promoter ( $P_{psbA2'}$ ), cloned in the BioBrick compatible interface. |
| pSN16K.Cgfp  | pSN16K plasmid with the GFP generator BioBrick BBa_E0240 under the control of a constitutive promoter ( $P_{psbA2'}$ ), cloned in the BioBrick compatible interface. |

**Supplementary Table S7.** List of *Synechocystis* mutants constructed in this work

| <b>Mutant name</b> | <b>Description</b>                                                                                                                                                                                    |
|--------------------|-------------------------------------------------------------------------------------------------------------------------------------------------------------------------------------------------------|
| <b>SN5K</b>        | <i>Synechocystis</i> mutant with replacement of the neutral site N5 by a kanamycin resistance cassette.                                                                                               |
| <b>SN8K</b>        | <i>Synechocystis</i> mutant with replacement of the neutral site N8 by a kanamycin resistance cassette.                                                                                               |
| <b>SN10K</b>       | <i>Synechocystis</i> mutant with replacement of the neutral site N10 by a kanamycin resistance cassette.                                                                                              |
| <b>SN15K</b>       | <i>Synechocystis</i> mutant with replacement of the neutral site N15 by a kanamycin resistance cassette.                                                                                              |
| <b>SN16K</b>       | <i>Synechocystis</i> mutant with replacement of the neutral site N16 by a kanamycin resistance cassette.                                                                                              |
| <b>SN5KS</b>       | <i>Synechocystis</i> mutant with replacement of the neutral site N5 by a kanamycin resistance/sucrose sensitivity cassette.                                                                           |
| <b>SN8KS</b>       | <i>Synechocystis</i> mutant with replacement of the neutral site N8 by a kanamycin resistance/sucrose sensitivity cassette.                                                                           |
| <b>SN10KS</b>      | <i>Synechocystis</i> mutant with replacement of the neutral site N10 by a kanamycin resistance/sucrose sensitivity cassette.                                                                          |
| <b>SN15KS</b>      | <i>Synechocystis</i> mutant with replacement of the neutral site N15 by a kanamycin resistance/sucrose sensitivity cassette.                                                                          |
| <b>SN16KS</b>      | <i>Synechocystis</i> mutant with replacement of the neutral site N16 by a kanamycin resistance/sucrose sensitivity cassette.                                                                          |
| <b>SN5K.gfp</b>    | <i>Synechocystis</i> mutant with replacement of the neutral site N5 by a kanamycin resistance cassette and the promoterless GFP encoding sequence.                                                    |
| <b>SN8K.gfp</b>    | <i>Synechocystis</i> mutant with replacement of the neutral site N8 by a kanamycin resistance cassette and the promoterless GFP encoding sequence.                                                    |
| <b>SN10K.gfp</b>   | <i>Synechocystis</i> mutant with replacement of the neutral site N10 by a kanamycin resistance cassette and the promoterless GFP encoding sequence.                                                   |
| <b>SN15K.gfp</b>   | <i>Synechocystis</i> mutant with replacement of the neutral site N15 by a kanamycin resistance cassette and the promoterless GFP encoding sequence.                                                   |
| <b>SN16K.gfp</b>   | <i>Synechocystis</i> mutant with replacement of the neutral site N16 by a kanamycin resistance cassette and the promoterless GFP encoding sequence.                                                   |
| <b>SN5K.Cgfp</b>   | <i>Synechocystis</i> mutant with replacement of the neutral site N5 by a kanamycin resistance cassette and the GFP encoding sequence under the control of a constitutive promoter ( $P_{psbA2^*}$ ).  |
| <b>SN8K.Cgfp</b>   | <i>Synechocystis</i> mutant with replacement of the neutral site N8 by a kanamycin resistance cassette and the GFP encoding sequence under the control of a constitutive promoter ( $P_{psbA2^*}$ ).  |
| <b>SN10K.Cgfp</b>  | <i>Synechocystis</i> mutant with replacement of the neutral site N10 by a kanamycin resistance cassette and the GFP encoding sequence under the control of a constitutive promoter ( $P_{psbA2^*}$ ). |
| <b>SN15K.Cgfp</b>  | <i>Synechocystis</i> mutant with replacement of the neutral site N15 by a kanamycin resistance cassette and the GFP encoding sequence under the control of a constitutive promoter ( $P_{psbA2^*}$ ). |
| <b>SN16K.Cgfp</b>  | <i>Synechocystis</i> mutant with replacement of the neutral site N16 by a kanamycin resistance cassette and the GFP encoding sequence under the control of a constitutive promoter ( $P_{psbA2^*}$ ). |



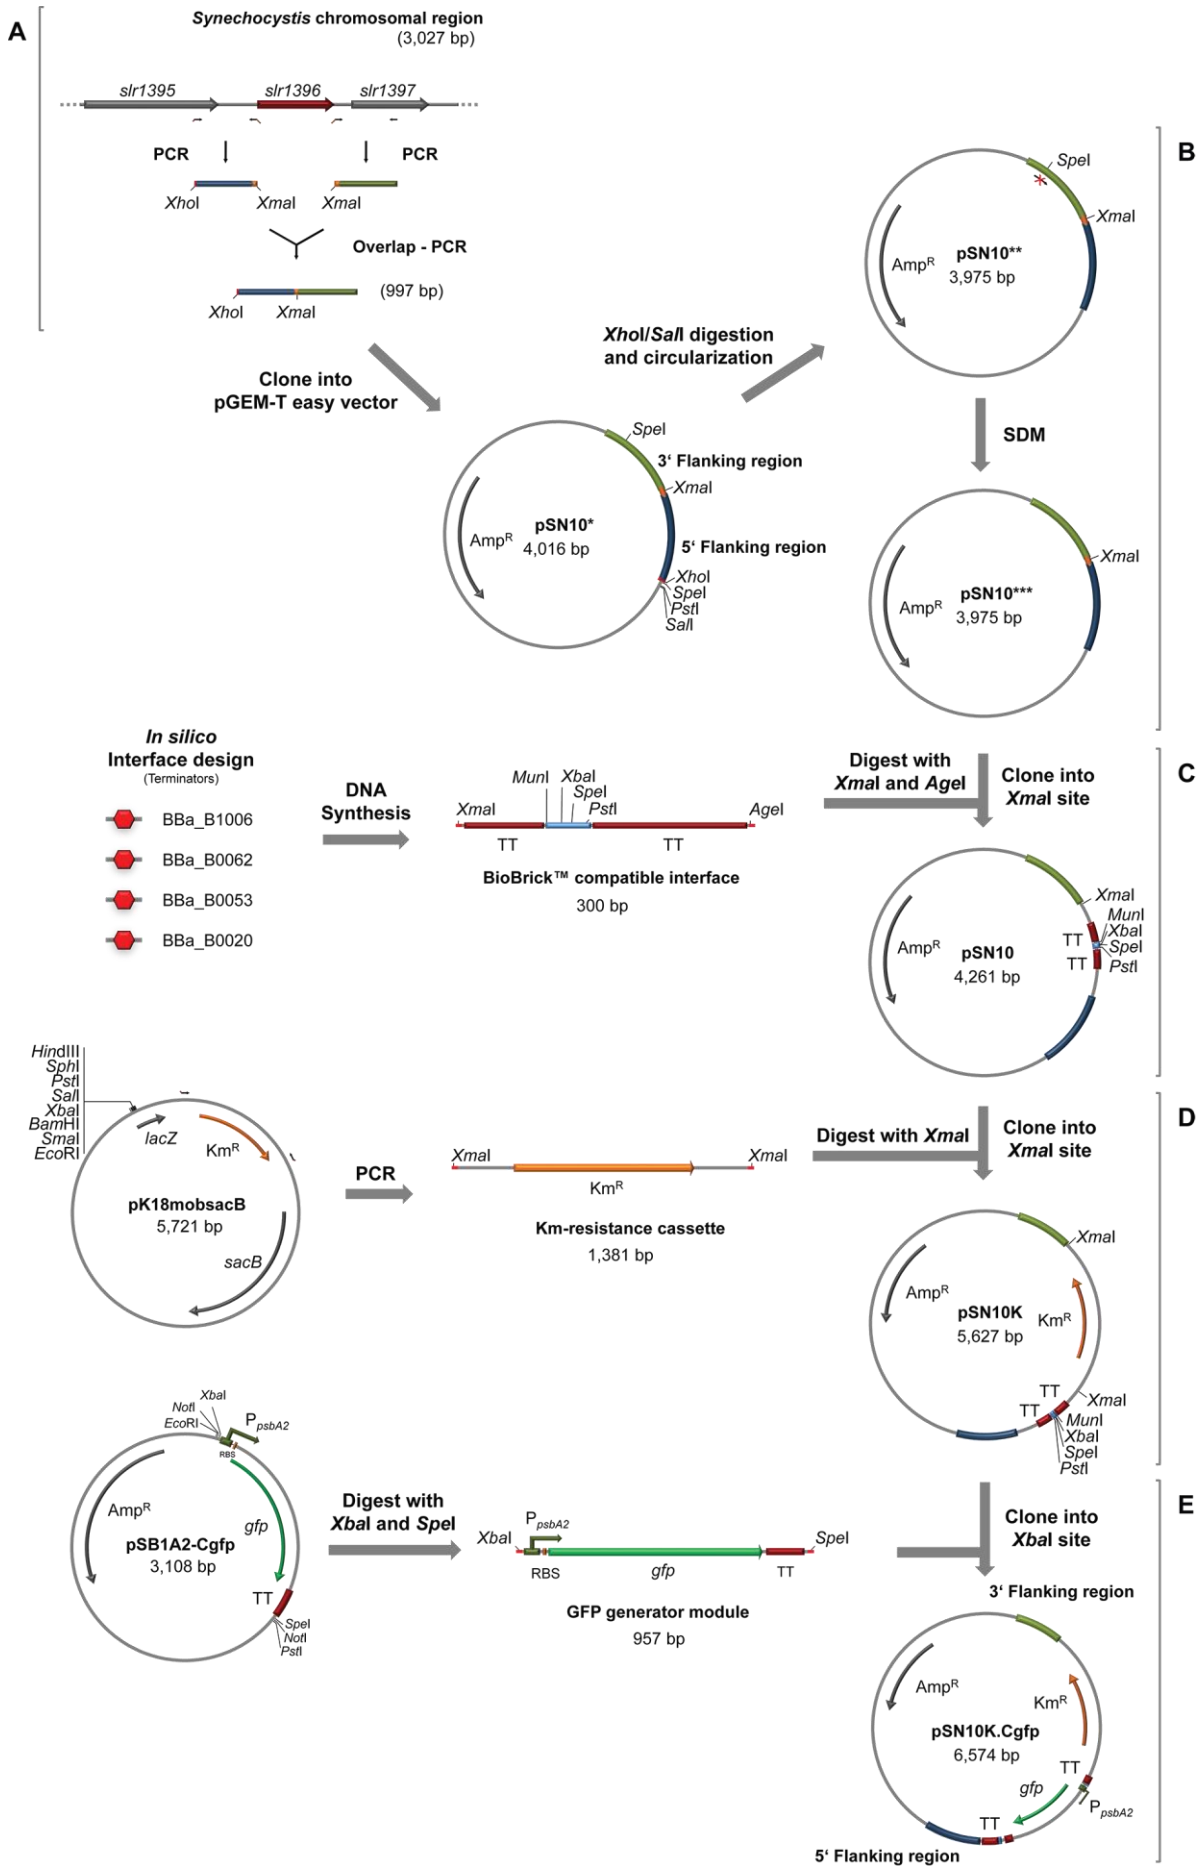

**Supplementary Figure S1.** Schematic representation of pSN10K.Cgfp construction. Homologous regions flanking the putative neutral site were amplified by PCR (primers indicated by arrows) and fused by overlap-PCR (**A**). The fragment containing the two flanking regions was cloned into the pGEM-T easy vector; the restriction sites incompatible with the BioBrick standard RFC[10] were removed by digestion with *XhoI* and *SaI* and vector re-circularization, and by site directed mutagenesis (SDM, mutagenic primers indicated by a crossed arrow) (**B**). The BioBrick-compatible cloning interface, flanked by two double BioBrick transcription terminators (TT), was synthesized and cloned into the *XmaI* site of the vector originating the pSN10 plasmid (**C**). A selection cassette conferring resistance to kanamycin was amplified by PCR (primers indicated by arrows) from the plasmid pK18mobsacB and cloned into the *XmaI* site (pSN10K) (**D**). Subsequently, the module containing the GFP encoding sequence under the control of the minimal *psbA2* promoter ( $P_{psbA2^*}$ ) was excised from the BioBrick vector pSB1A2-Cgfp and cloned into the cloning interface, originating the integrative plasmid pSN10K.Cgfp (**E**). For details see Material and Methods.

**A**

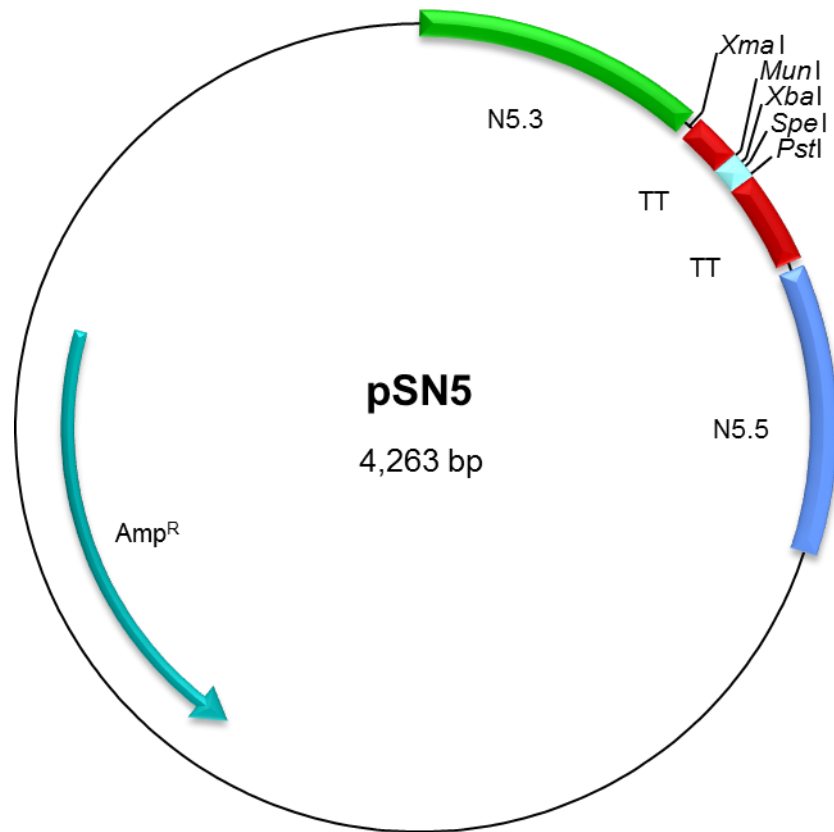

**B**

>pSN5

```
TGTCCAAATCAGCATTGCTCTGCCAGGTGAGACGGAGTTTTTGTCCACTAATCCCTGTTGGATAGAAGGCGCTTGATACAGTTCCAACCAAAAC
CCAATCTCCTGCCTGGCTTTAGTTTCTCCACCCTCGGCAGGATTAACGACCCAACCCTCTCCCAAAGGCCGATAATACGCCTCATCTAAA
TTCTGTTGCAGAGGATAAATAATCTACCTGGTTGGCGGGCAACTGACTGCTAATTTGATAATCCGGGATGCGGCCAGAGGTTTCTGAGGTTGAA
ACAGCGTAGCTAGGGAATCACCACCAGAGCGCGATCGCCACCAATACCATCCGCCAGCGCCATTGCTTTCATCTGTGGACTGCCCTAAAAAT
GCCATAAAAAAACCTGGGGCGCTTTTCTTGTTCGACTCCAGATGTTTTTCTAATTTCCCTCACACCTGTCTAAGTATAAATCACCACGG
GGATTGTCAAGGCTTCAGGATTACACCCGGGAAAAAAAACCCCGCCCTGACAGGGCGGGTTTTTTTTTCAGATAAAAAAATCCTTAGCTTT
CGCTAAGGATGATTTCTGCAATTGGCGGGCGCTTCTAGAATGCACTAGTAGCGGGCGCTGCAGTCCGGCAAAAAAACGGGCAAGGTGTCACCAC
CCTGCCCTTTTCTTTAAACCGAAAAGATTACTTCGCGTTGGAGAGCGTTCCACCAGCAAAACAACAGATAAAACGAAAGGCCAGTCTTTTCGAC
TGAGCCTTTCGTTTTATTGATGCCTGGTACCGGGTGAATCGGTTGATTATTTTCAGTGGCCCGCCGATGGATAATTACCATGGCCCGACCGA
CCGGGATTTCCAGACCAGTTGAACAGTATTAATTTAGCCTTTCCGGACAAGGCTCTGTGAAAACTTAAAAAAGTATTTAAGATTTTAAAGC
TAGCTTATTTCCGAGGAAATGTGTTTACTCGACTTGCCAGCAACACCGCGATTTCGTGAAGGATTTAGTCATGAGCTTGAGGGCTTTGGCCA
CTGTGCTCGAAAAATCGGGCTACATTGCTTCTTGCTACACCTGTGGGACCAACTCAACAGCGCTCCTTCATGGTGAGCTTGGGGAAAAATCA
TCTGATCCGCTTTTGGTATCGGACTACGGCATCACCTGGACAGAAATGGGGGATGACCGAGAATTAATGAAATTAGAAGGAGCCGAGCGGATC
GCCAGTTGGAAGAATTGGCCAATGTGGTCAAATATTGCCTAGCAGATGCCCCACTCGACCATATGGGAGAGCTCCCAACGCGTTGGATGCAT
AGCTTGAGTATTCATAGTGTACCTAAATAGCTTGGCGTAATCATGGTCATAGCTGTTTCTGTGTGAAATTTGTTATCCGCTCACAAATTCAC
ACAACATACGAGCCGGAAGCATAAAGTGTAAAGCTGGGGTGCCTAATGAGTGAGCTAACTCACATTAATTTGCGTTGCGCTCAGCTGCCCGCTT
CCAGTCGGGAAACCTGTCTGTGCCAGCTGCATTAATGAATCGGCCAACCGCGGGGAGAGGCGGTTTGCCTATTGGGCGCTTCCGCTTCCCTCG
CTCACTGACTCGCTGCGCTCGGTCGTTCCGGCTGCGGGCAGCGGTATCAGCTCACTCAAAGGCGGTAATACGGTTATCCACAGAATCAGGGGATA
ACCGAGGAAAGAATGTGAGCAAAAGGCCAGCAAAAGGCCAGGAACCGTAAAAAGGCCGCGTTGCTGGCGTTTTTCCATAGGCTCCGCCCCCTC
TGACGAGCATCACAAAAATCGACGCTCAAGTCAGAGGTGGCGAAACCCGACAGGACTATAAAGATACCAGGCGTTTTCCCTGGAAGCTCCCTC
GTGCGCTTCCCTGTTCCGACCCTGCCGCTTACCGGATACCTGTCCGCTTTCTCCCTTCGGGAAGCGTGGCGCTTCTCATAGCTACGCTGTA
GGTATCTCAGTTCCGGTGTAGGTCGTTCCGCTCCAAGCTGGGCTGTGTGCACGAACCCCGCTTCCAGCCGACCGCTGCGCTTATCCGGTAACCTA
TCGCTTTGAGTCCAACCCGGTAAGACACGACTTATCGCCACTGGCAGCAGCCACTGGTAACAGGATTAGCAGAGCGAGGATGTAGGCGGTGCT
ACAGAGTTCTTGAAGTGGTGGCTAACTACGGCTACACTAGAAGAACAGTATTTGGTATCTGCGCTCTGCTGAAGCCAGTTACCTTCGGAAAAA
GAGTTGGTAGCTCTTGATCCGGCAAAACAACCACCGCTGGTAGCCGTGGTTTTTTTTGTTTGCAGCAAGCAGAGATTACGCGCAGAAAAAAGGATC
TCAAGAAGATCCTTTGATCTTTTCTACGGGCTGACGCTCAGTGAACGAAAACACAGTTAAGGGATTTTGGTCATGAGATTACAAAAAGG
ATCTTACCTAGATCCTTTTAAATTAATAATGAAGTTTTAAATCAATCTAAAGTATATATGAGTAACTTGGTCTGACAGTTACCAATGCTTAA
TCAGTGAGGCACCTATCTCAGCGATCTGTCTATTTCTGTTTATCCATAGTTGCCTGACTCCCGCTCGTGTAGATAACTACGATACGGGAGGGCTT
ACCATCTGGCCCCAGTGTGCAATGATACCGCGAGACCCACGCTCACCAGCTCCAGATTTATCAGCAATAAACAGCCAGCCGGAAGGGCCGAG
CGCAGAAGTGGTCTGCAACTTTATCCGCTCCATCCAGTCTATTAATTTGTTGCCGGAAGCTAGAGTAAGTAGTTCCGCCAGTTAATAGTTTGC
GCAACGTTGTTGCCATTGCTACAGGCATCGTGGTGTACGCTCGCTGTTGGTATGGCTTCACTCAGCTCCGGTTCCCAACGATCAAGGCGAGT
TACATGATCCCCCATGTTGTGCAAAAAAGCGGTTAGCTCCTTCGGTCTCCGATCGTTGTGAGAAAGTAAAGTTGGCCGAGTGTATCACTCATG
GTTATGGCAGCACTGCATAATCTTACTGTCTATGCCATCCGTAAGATGCTTTTCTGTGACTGGTGAAGTACTCAACCAAGTCATTTCTGAGAA
AGTGTATGCGGCGACCGAGTTGCTCTTGGCCGGCTCAATACGGGATAATACCGCCACATAGCAGAACTTAAAAAGTCTCATCATTTGGAAA
```

```
ACGTTCTTCGGGGCGAAAACCTCTCAAGGATCTTACCGCTGTTGAGATCCAGTTCGATGTAACCCACTCGTGCACCCAACCTGATCTTCAGCATCT
TTTACTTTTACCAGCGTTTCTGGGTGAGCAAAAACAGGAAGGCAAAATGCCGCAAAAAGGGAATAAGGGCGACACGGAAATGTTGAATACTCA
TACTCTTCCTTTTCAATATTATTGAAGCATTATCAGGGTTATTGTCTCATGAGCGGATACATATTTGAATGTATTTAGAAAAATAAACAAAT
AGGGGTTCCGCGCACATTTCCCGAAAAGTGCCACCTGATGCGGTGTGAAATACCGCACAGATGCGTAAGGAGAAAAATACCGCATCAGGAAATT
GTAAGCGTTAATATTTTGTAAAAATTCGCGTTAAATTTTGTAAATCAGCTCATTTTTTAACCAATAGGCCGAAATCGGCAAAATCCCTTATA
AATCAAAAAGAAATAGACCGAGATAGGGTTGAGTGTGTTCCAGTTTGGAACAAGAGTCCACTATTTAAAGAACGTGGACTCCAACGTCAAAGGGCG
AAAAACCGTCTATCAGGGCGATGGCCCACTACGTGAACCATCACCTAATCAAGTTTTTTGGGGTCGAGGTGCCGTAAAGCACTAAATCGGAAC
CCTAAAGGGAGCCCCGATTTAGAGCTTGACGGGGAAAGCCGGCGAACGTGGCGAGAAAGGAAGGAAGAAAGCGAAAGGAGCGGGCGCTAGGG
CGCTGGCAAGTGTAGCGGTACGCTGCGGTAACCACCACACCCGCCGCTTAATGCGCGCTACAGGGCGCGTCCATTGCGCATTCAGGCTG
CGCAACTGTTGGGAAGGGCGATCGGTGCGGGCCTCTTCGCTATTACGCCAGCTGGCGAAAGGGGGATGTGCTGCAAGGCCGATTAAGTTGGGTAA
CGCCAGGGTTTTCCAGTCACGAGTTGTAAAACGACGGCCAGTGAATTGTAATACGACTCACTATAGGGCGAATTGGGCCCGACGTCGCATGC
TCCCGCCGCCATGGCGCCGCGGAATTTCGAT
```

**Supplementary Figure S2.** Plasmid pSN5. The plasmid map with the main features highlighted is depicted in **A** and the FASTA formatted sequence in **B**. N5.3 – 3’ homologous region for site N5; N5.5 – 5’ homologous region for site N5; TT – double transcriptional terminators; Amp<sup>R</sup> – gene encoding the protein responsible for ampicillin resistance.

A

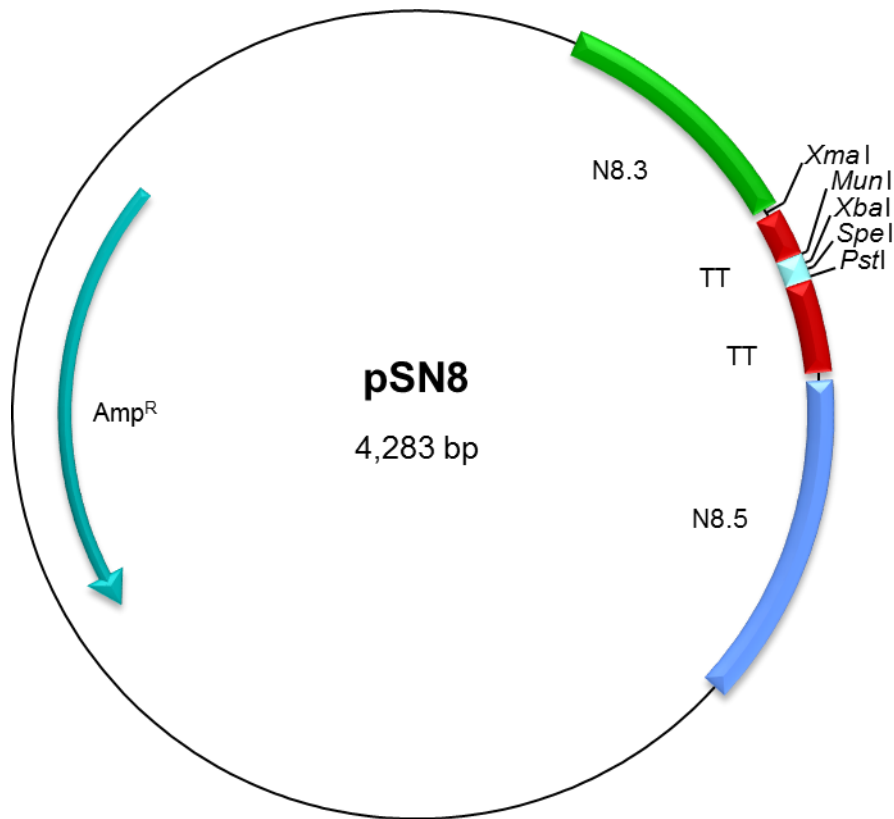

B

```
>pSN8
CACCCGCCGCGCTTAATGCGCCGCTACAGGGCGCGTCCATTCCGCCATTACAGGCTGCGCAACTGTTGGGAAGGGCGATCGGTGCGGGCCCTCTTCG
CTATTACGCCAGCTGGCGAAAGGGGATGTGCTGCAAGGCGATTAAAGTTGGGTAAACGCCAGGGTTTCCAGTCACGACGTGTGAAAACGACGG
CCAGTGAATTGTAATACGACTCACTATAGGGCGAATTGGGCCCGACGTCGCATGCTCCCGGCCGCCATGGCGGCCCGGGAATTCGATTGATGA
CCGCTGGCGGAGTTTAGTCCAGGGTTATTTGTACCGTCAAGGTTACATTGCCACCCAGATTTAACTACGCTGCGAGTCCGTACCATGGCGAT
CGGGCCTATCTCACCATTAAGGGTAAAAATGCCAGCATTGCCCGCTTGGATTTGAGTATGAAATCTTGCAGTGGGAAGCCAAATTAATTTTGAC
AGAACTCTGTTACCCGCCCTGATTGAAAATATCGTTATTGCTCGATTACCATGGTAAAACCTGAGAAGTAGACGAGTTTTTGGGGGATAACC
AGGTCTAATTTTAGCGGAAGTGAATTAACCTACACTGGTGAAAAAATAAGTCTACTTCCCTGGATCGGGGAAGAGGTAAACGGATGATGCCCG
CTATTACAACGCTCAATTTAGCCCAACATCCCTACAAAAATGGTGACAAGATTACACCCGGGAAAAAAAACCCCGCCCTGACAGGGCGGGGT
TTTTTTTCAGATAAAAAAATCCTTAGCTTTCGCTAAGGATGATTTCTGCAATTGGCGGCCGCTTCTAGAAATGCACTAGTAGCGGCCGCTGCAG
TCCGGCAAAAAACGGCAAGGTGTCCACCCTGCCCCTTTTCTTTAAAACCGAAAAGATTACTTCCGCTTGGAGAGCGTTCCACCGACAAAACA
ACAGATAAAACGAAAGGCCAGTCTTTCGACTGAGCCTTTCGTTTTATTGATGCTGGTACCAGGTTGTAATCCTTCAATCCCTTATTGTTATT
AATAGTCTCTGAACTAACAAATAAGCAAGATCAAATTTGGAAGAAAACGCAACAAAATGAACCATTAAGATAAATTTCTGTCTATCCTGGCTG
GTATATCCAGTCTACTCAGAAATGAGTTGTTTTATGACAAATCAGTATGTACCAAAATTAAGTGGCGCAATCGATCCTGGTAACCTATTTTG
TTGCTTACCCCTGGGTATTGTGGCATTATCAAGCATCGGAAGTAAATCTCGTTTAGCTTACGGGACTATGAAGGCGCTGTAAGGCTTCC
AAGGAAGCGAAAAAGTTTTGTTGGTGGTCTTTGGTGCCGGCATAATTTTCATTGCCATCATTGTTGTCGTAGTGGTTATTGGCCGCTTTG
GTCAGTAATTAAGTTACATTTTTGACTTTGCTTGTCCATTATTAACGAATACCATGTTTAGTTGAAAAATTAATCCCATCTCCAT
TACTATCCGCTAAGGCCAAGGAATATTTAGTATCACTTTGGTAACCCTAACCATGTGCTTGTGGCAGTCCGACATATGGGAGAGCTCCCAA
CGCGTTGGATGCATAGCTTGAGTATTCTATAGTGTCCCTAAATAGCTTGGCGTAATCATGGTCAATAGCTGTTTCCCTGTGTGAAATTTGTTATCC
GCTCACAAATTCACACAACATACGAGCCGGAAGCATAAAAGTGAAGGCCAGGGTGGCCTAATGAGTGAAGTAACTACATTAATTCGTTGCGC
TCACTGCCCGCTTTCCAGTCGGGAAACCTGTGCTGCCAGCTGCATTAATGAATCGGCCAACGCGCGGGGAGAGCGGTTTTGCGTATTGGCGCT
CTTCCGCTTCCCTCGCTCACTGACTCGCTGCGCTCGGTGCTTCCGCTGCGCGGAGCGGTATCAGCTCACTCAAAGCGGTAATACGGTTATCCAC
AGAATCAGGGGTAACGCAGGAAGAACAATGTGAGCAAAAGGCCAGCAAAAGGCCAGGAACCGTAAAAAGGCCGCTTGTGCGCTTTTTCCAT
AGGCTCCGCCCCCTGACGAGCATCAAAAAATCGACCGTCAAGTCAGAGGTGGCGAAAACCCGACAGGACTATAAAGATACCCAGGCGTTTTCC
CTGGAAGCTCCCTCGTGCCTCTCTGTCCGACCCTGCCGCTTACCGGATACCTGTCCGCTTTCTCCCTTCGGGAAGCGTGGCGCTTTCTCA
TAGCTCACGCTGTAGGTATCTCAGTTCCGTTGATGTCGCTCCAAGCTGGGCTGTGTGCACGAACCCCGTTCAGCCCGACCGCTGCGCC
TTATCCGGTAACATCGTCTTGAGTCCAACCCGGTAAGACACGACTTATCGCCACTGGCAGCAGCCACTGGTAACAGGATTAGCAGAGCGAGGT
ATGTAGGCGGTGCTACAGAGTTCTTGAAGTGGTGGCCTAACTACCGCTACACTAGAAGAACAGTATTTGGTATCTGCGCTCTGCTGAAGCCAGT
TACCTTCGGAAAAAGAGTTGGTAGCTCTTGATCCGGCAAAACAACCACCGCTGGTAGCGGTGGTTTTTTTTGTTTGAAGCAGCAGATTACGCGC
AGAAAAAAGGATCTCAAGAAGATCCTTTGATCTTTTCTACGGGCTGTGACGCTCAGTGAACGAAAACCTCACGTTAAGGATTTTTGGTCAATGA
GATTATCAAAAAGGATCTTACCTAGATCCTTTTAAATTAATAAATGAAGTTTAAATCAATCTAAAGTATATATGAGTAACTTGGTCTGACAG
TTACCAATGCTTAATCAGTGAGGCACCTATCTCAGCGATCTGTCTATTTTCGTTTCCATAGTTGCTGACTCCCCGTCGTGTAGATAAATACG
ATACGGGAGGGCTTACCATCTGGCCCCAGTGTGCAATGATACCGCGAGACCCACGCTCACCGGCTCCAGATTTATCAGCAATAAACCAGCCAG
CCGGAAGGGCCGAGCGCAGAAGTGGTCCGCAACTTTATCCGCTCCATCCAGCTTATTAATTTGTCGGGGAAGCTAGAGTAAGTAGTTCCGC
AGTTAATAGTTTGGCAACGTTGTTGCCATTGCTACAGGCATCGTGGTGTACCGCTCGTCTGGTATGGCTTCAATCAGCTCCGGTCCCAA
CGATCAAGCGGAGTTACATGATCCCCCATGTTGTGCAAAAAAAGCGGTTAGCTCCTTCGGTCCCTCCGATCGTTGTGCAAGTAAGTTGGCCCGAG
TGTTATCACTCATGGTTATGGCAGCACTGCATAATTTCTTACTGTGATGCCATCCGTAAGATGCTTTTCTGTGACTGGTGAAGTCAACCAA
```

```
GTCATTCTGAGAATAGTGTATGCGGCGACCGAGTTGCTCTTGCCCGGCGTCAATACGGGATAATACCGCGCCACATAGCAGAACCTTAAAAGTG
CTCATCATTGAAAACGTTCTTCGGGGCGAAAACCTCTCAAGGATCTTACCGCTGTTGAGATCCAGTTCGATGTAACCCACTCGTGACCCAACT
GATCTTCAGCATCTTTTACTTTCCAGCGTTTCTGGGTGAGCAAAAACAGGAAGGCAAAATGCCGCAAAAAGGAATAAGGGCGACACGGAA
ATGTTGAATACTCATACTCTTCCTTTTCAATATTATTGAAGCATTATCAGGGTTATTGTCTCATGAGCGGATACATATTTGAATGTATTTAG
AAAAATAACAAATAGGGGTTCCGCGCACATTTCCCGAAAAGTGCCACCTGATGCGGTGTGAAATACCGCACAGATGCGTAAGGAGAAAATAC
CGCATCAGGAAATGTAAGCGTTAATATTTGTTAAAATTCGCGTTAAAATTTTGTAAATCAGCTCATTTTTTAACCAATAGGCCGAAATCGG
CAAAATCCCTTATAAATCAAAGAATAGACCGAGATAGGGTTGAGTGTGTTCCAGTTTGAACAAGAGTCCACTATTAAAGAACGTGGACTCC
AACGTCAAAGGGCGAAAACCGTCTATCAGGGCGATGGCCACTACGTGAACCATCACCTAATCAAGTTTTTTGGGGTCGAGGTGCCGTAAG
CACTAAATCGGAACCTAAAGGGAGCCCCGATTTAGAGCTTGACGGGGAAAGCCGGCGAACGTGGCGAGAAAGGAAGGAAGAAAGCGAAAGG
AGCGGGCGCTAGGGCGCTGGCAAGTGTAGCGGTACGCTGCGCGTAACCACCA
```

**Supplementary Figure S3.** Plasmid pSN8. The plasmid map with the main features highlighted is depicted in **A** and the FASTA formatted sequence in **B**. N8.3 – 3' homologous region for site N8; N8.5 – 5' homologous region for site N8; TT – double transcriptional terminators; Amp<sup>R</sup> – gene encoding the protein responsible for ampicillin resistance.

**A**

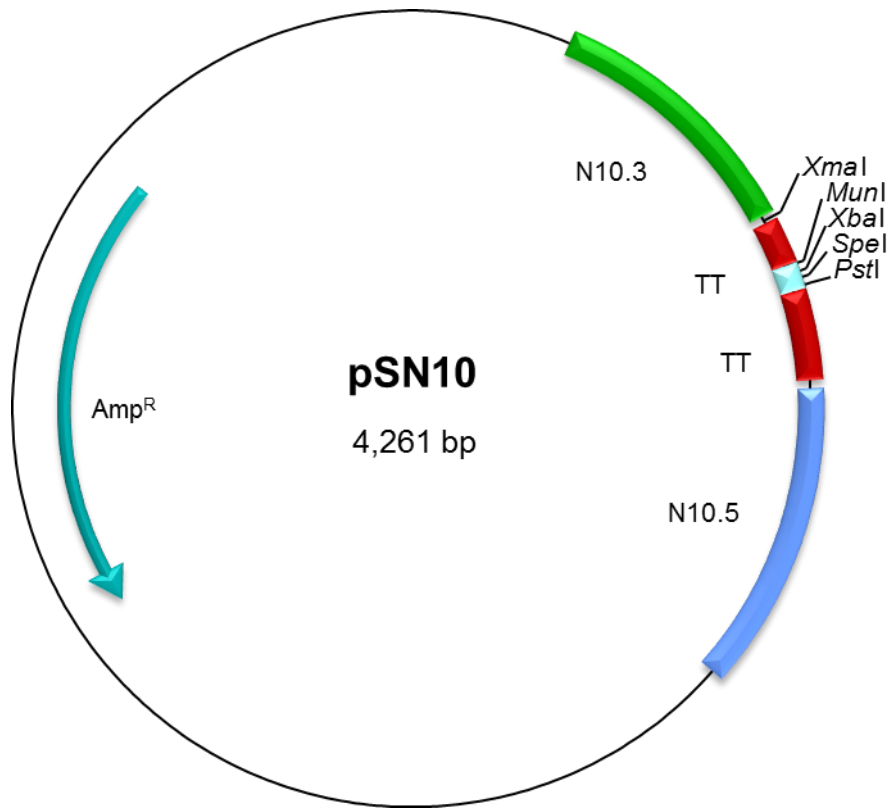

**B**

>pSN10

```
CACCCGCGCGCTTAATGCGCCGTACAGGGCGCGTCCATTCCGCATTACAGGCTGCGCAACTGTTGGGAAGGGCGATCGGTGCGGGCCTCTTCG
CTATTACGCCAGCTGGCGAAAGGGGATGTGCTGCAAGGCATTAAAGTTGGGTAAACGCCAGGGTTTTCCAGTCACGACGTTGTAACACGACGG
CCAGTGAATTGTAATACGACTCACTATAGGGCGAATTGGGCCCGACGTCGCATGCTCCCGGCCCGCATGGCGGCCGCGGGAATTCGATTGGACT
GACCCAAGATACAGTGGTAGCTTCAAGTTCGTCATCAACCCCAATGGAAAGCTGAGATAATCTGTTGTTGATGCGACCGTCTTCATTTTAGCT
AAAAAGACAAGCTGTGGCTAGTTACTATGACGAGGCCATCGGGTCTATCCAGCGGTCTTGCTGATTCCAAAACCTGGCGATTTTCTGAAGTA
GTATCTTTTACCCTTAAGCCGCCAAGGCTTTGGATGAGCTTGGTCGAATCATCTTTTGATGCCTCGACATCGGAATAACTTTGTAACGAC
CTTCCCGAGCTTGAATGCAAGTCGGTTAGATTATCCATCAGAGTTGAATGCCGATAATACAGACTGCTATACTATTTAATGAAAAGAGTGCT
GGCAAGCAAGCCCGCAACGTTGAAGCTGTGCAGCGCAACGAAAGCGCATTGTAGTTTGGCTCGGATTACACCCGGGAAAAAAAACCCCGC
CCCTGACAGGGCGGGTTTTTTTTCAGATAAAAAAATCCTTAGCTTTCGCTAAGGATGATTTCTGCAATGGCGGCCCGCTTCTAGAATGCACT
AGTAGCGCGCTGCAGTCCGGCAAAAAACGGCAAGGTGTACCACCCCTGCCCTTTTTCTTTAAAACCGAAAAGATTACTTCGCGTTGGAGA
GCGTTCACCGACAACAACAGATAAAACGAAAGGCCAGTCTTTCGACTGAGCCTTTCGTTTTATTTGATGCCTGGTACCGGGTGTAAATCCCA
TACTCAGCCTTCTAATGCTGAGAGAATGCCTGAAAAGAACCCTAAGTCAAATTTATTTGATTAAGTTTTATTAAGTCAACGGAGGTGTGAGT
AGCATTTAGATCGTAAAAGCATAACGGCATGAACAACCCATGAACGCCACTCCAGAGGTTAATGTTTACCCCAAGGTTTATGTTTACCAAAATCCCTGACT
TTTTCCGAGTTGGGGGACAAAATCAACTAATTTGGGCGACGATTTTTTCTGCTATCTGGCGATCGCCATGTTTGTCTAATCTCTGATCCAACCT
AGGTTTTTGGGGGCTTTCCAAACAAAAATCCAGTTGCCGGCGAAAATTTGCTGGTGGGGCACAATTTGGTGCTCTCCGTAAGTTCTGCAACCT
GCCAGTAAAATTCGCTTCCGCAAAACCATCCCTGGTGGGGAATAATCGGGACTTCTAATTTAACGCTTCAGCAAAGGTACCAAAACCCAG
GCTTGGAAAATACCCGTCGCAAGGGGCATTAATCCACCGGGCGACTCGACCATATGGGAGAGCTCCCAACCGGTTGGATGCAATAGCTTGG
TATTTCTATAGTGTACCTAATAGCTTGGCGTAATCATGGTCAATAGCTGTTTCCGTGTGAAATTTGTTATCCGCTCACAATTCACACAACATA
CGAGCCGGAAGCATAAAGTGTAAAGCCTGGGGTGCCATTAATGAATCGGCCAACGCGCGGGGAGAGGCGGTTTGGCTATTGGGCGCTCTTCCGCTCCTCGCTCACTGA
CTCGCTCGGCTCGGTCGTTTCGGCTGCGGGGAGCGGTATCAGTCACTCAAAGGCGGTAATACGGTTATCCACAGAAATCAGGGGATAACGCAGGA
AAGAACATGTGAGCAAAAGGCCAGCAAAAGGCCAGGAACCGTAAAAGGCCGCGTGTGCTGGCGTTTTTCCATAGGCTCCGCCCCCTGACGAGC
ATCACAATAATCGACGCTCAAGTCAGAGGTGGCGAAACCCGACAGGACTATAAAGATACCAGGCGTTTTCCCTGGAAGCTCCCTCGTGCCTC
TCTGTTCCGACCTGCGCTTACCGGATACCTGTCCGCTTTTCCCTTCGGGAAGCGTGGCGCTTTCTCATAGCTCACGCTGTAGGTATCTC
AGTTCGGGTAGGTCGTTTCGCTCAAGCTGGGCTGTGTGCACGAAACCCCGTTAGCCCGACCGCTGCGCCTTATCCGTTAATCACTATCGTCTT
AGTCCAACCCGGTAAAGACACGACTTATCGCCACTGGCAGCAGCCACTGGTAAACAGGATTAGCAGAGCGAGGTATGTAGGCGGTGTACAGAGTT
CTTGAAGTGGTGGCTAACTACGGCTACACTAGAAGAACAGTATTTGGTATCTGCGCTCTGCTGAAGCCAGTTACCTTCGGAAAAAGAGTTGGT
AGCTCTTGATCCGGCAACAACACCCGCTGGTAGCGGTGGTTTTTTTGGTTTGAAGCAGCAGATTACCGCGCAAAAAAAGGATCTCAAGAA
ATCCTTTGATCTTTCTACGGGGTCTGACGCTCAGTGGAACGAAACTCACGTTAAGGGATTTTGGTCAATGAGATATCAAAAAGGATCTTCAC
CTAGATCTTTTAAATTAATAATGAAGTTTAAATCAATCTAAAGTATATATGAGTAAACTTGGTCTGACAGTTACCAATGCTTAATCAGTGAG
GCACCTATCTCAGCGATCTGTCTATTTCTGTTTCCATAGTTGCCTGACTCCCGCTCGTGTAGATAACTACGATACGGGAGGGCTTACCATCTG
GCCCGAGTGTGCAATGATACCGCGAGACCCACGCTCACCGGCTCCAGATTTATCAGCAATAAACAGCCAGCCGGAAGGGCCGAGCGCAGAA
TGGTCTGCAACTTTATCCGCTCCATCCAGTCTATTAATTTGGTGGGAAAGCTAGAGTAAGTAGTTCCGCAAGTTAATAGTTTGGCAACGTT
GTTGCCATTGCTACAGGCATCGTGGTGTACGCTCGTCTTGGTATGGCTTCATTCAGCTCCGGTTCCCAACGATCAAGGCGAGTTACATGAT
CCCCATGTTGTGCAAAAAGCGGTTAGCTCCTTCGGTCTCCGATCGTTGTGCAAGTAAGTTGGCCGAGTGTATCACTCATGTTATGGC
```

```
AGCACTGCATAAATCTCTTACTGTGCATGCCATCCGTAAGATGCTTTTCTGTGACTGGTGAGTACTCAACCAAGTCATTCTGAGAATAGTGTATG
CGGCGACCGAGTTGCTCTTGCCCGGCGTCAATACGGGATAAATACCGCGCCACATAGCAGAACTTTAAAAGTGCTCATCATTGGAAAACGTTCTT
CGGGGCGAAAACCTCAAGGATCTTACCGCTGTTGAGATCCAGTTCGATGTAACCCACTCGTGCAACCAACTGATCTTCAGCATCTTTACTTT
CACCAGCGTTTCTGGGTGAGCAAAAACAGGAAGGCAAAAATGCCGCAAAAAGGGAATAAGGGCGACACGGAAATGTTGAATACTCATACTCTTC
CTTTTCAATATTTAAGCATTATCAGGGTTATTGTCTCATGAGCGGATACATATTTGAATGTATTTAGAAAAATAACAAAATAGGGGTTTC
CGCGCACATTTCCCGAAAAGTGCCACCTGATGCGGTGTGAAATACCGCACAGATGCGTAAGGAGAAAAATACCGCATCAGGAAATGTAAGCGT
TAATATTTGTTAAAATTCGCGTTAAATTTTGTAAATCAGCTCATTTTTTAACCAATAGGCCGAAATCGGCAAAATCCCTTATAAATCAAAA
GAATAGACCGAGATAGGGTTGAGTGTGTTCCAGTTTGGAACAAGAGTCCACTATTAAGAACGTGGACTCCAACGTCAAGGGCGAAAAACCG
TCTATCAGGGCGATGGCCACTACGTGAACCATCACCTAATCAAGTTTTTTGGGGTCGAGGTGCCGTAAGCACTAAATCGGAACCTAAGG
GAGCCCCGATTTAGAGCTTGACGGGAAAAGCCGGCGAACGTGGCGAGAAAGGAAGGAAAGCGAAAAGGAGCGGGCGCTAGGGCGCTGGCA
AGTGTAGCGGTCACGCTGCGCGTAACCACCA
```

**Supplementary Figure S4.** Plasmid pSN10. The plasmid map with the main features highlighted is depicted in **A** and the FASTA formatted sequence in **B**. N10.3 – 3' homologous region for site N10; N10.5 – 5' homologous region for site N10; TT – double transcriptional terminators; Amp<sup>R</sup> – gene encoding the protein responsible for ampicillin resistance.



**A**

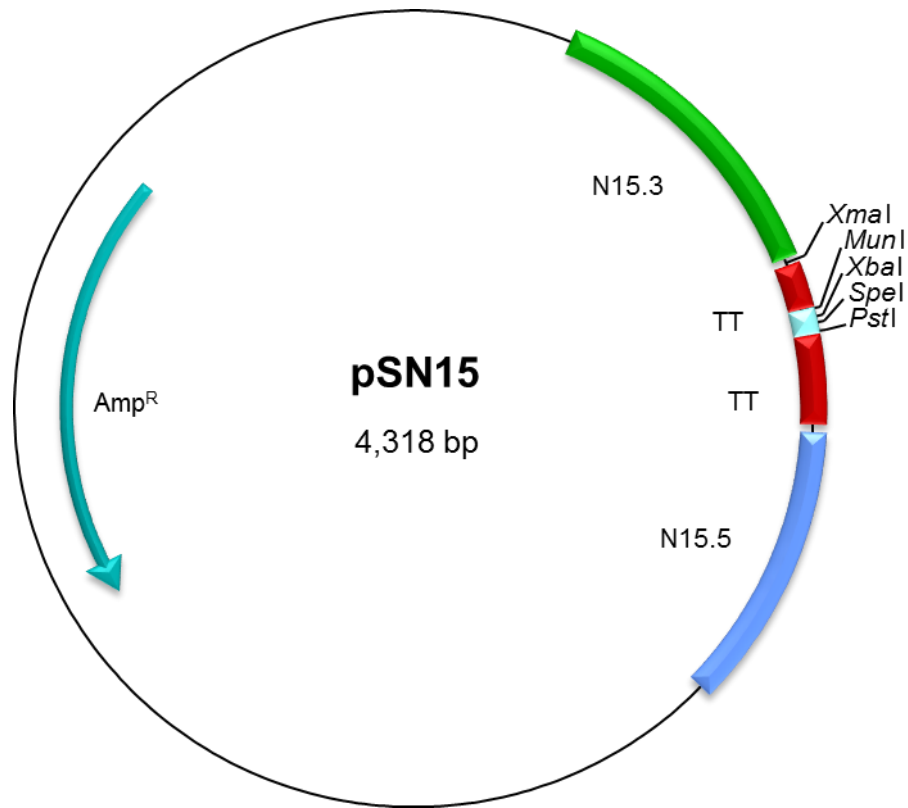

**B**

>pSN15

```
CACCCGCGCGCTTAATGCGCCGTACAGGGCGCGTCCATTCCGCATTACAGGCTGCGCAACTGTTGGGAAGGGCGATCGGTGCGGGCCTCTTCG
CTATTACGCCAGCTGGCGAAAGGGGATGTGCTGCAAGGCGATTAAAGTTGGTAAACGCCAGGGTTTTCCAGTCACGACGTTGTAACGACGG
CCAGTGAATTGTAATACGACTCACTATAGGGCGAATTGGGCCCGACGTCGCATGCTCCCGGCCGCCATGGCGGCCGCGGGAATTCGATTCTAAA
CTTACGGCATTGGCATCAACGGGAGCCACCGTCGGAGTAGGGGAAGTAACAACGGGGGAACTGGTATTGGTGGGCAAAATTTTACTAGCCATT
GATCCATTGGGGCAGATTGAACGCTCCCAACCACAAAAGTCCCCCTAATACAACGACAGAATAAATAACAGGAAAAAAGGAATCCAAGGAGT
TACCCCTCTTTATGGGATGGAACCTTCATCGACATTAAGGTGGGAGGGGAGGAGGCAATGGGACAATGGTGGTCCAGAAAAGGAAGGTGGC
TCCGACGTCAAGGCAACGGGACATCCACAGGATTCACAGAAACGAACCTGGGGGCTAAGGCGGTTGCCACAATTAGTACAAAAACGGGAGTAG
TCATAGGTGAAAACCCCGACTATAGAATTAGAAAAATTAACCTTTTATCCGAATTTTATTCGTCATGTTCCCAATAACTATCAAAATA
TGGAAAAATTAATTTGGTTCGTTGGTCACCGCTCCCTAAAAGACTGGCCATTGTAAGAGATTACACCCGGGAAAAAACCCTCCGCCCT
GACAGGGCGGGTTTTTTTTTCAGATAAAAAAATCCTTAGCTTTCGCTAAGGATGATTTCTGCAATTGGCGGCCGCTTCTAGAATGCACTAGTA
GCGGCCGCTGCAGTCCGGCAAAAAACGGGCAAGGTGTACCACCTGCCTTTTTCTTTAAAACCGAAAAGATTACTTCGCGTTGGAGAGCGT
TCACCGACAAACAACAGATAAAACGAAAGGCCAGTCTTTCGACTGAGCCTTCGTTTTATTTGATGCCTGGTACCGGGTGAATCCATTGGGC
ACGAGAGTTAGTGGGAGATTGCAATTAATAGAGGCTTAATGAGGCTTATGGTTGATAGGATGTTTTCGCTCCTGAAATTTTCGGCAAAATACAATACTTCGC
TCTTCTAGCCCTATTAACATTTTAAACGACAAATGATGGGGCAACGATTAACAATAATGAATAAAATTTATGTTTTCAAGATGAAAATTTG
AAAATTTGATTTCCCTATATTTCTACTATAGAAGACTAATACAATTAGATCTAAAATTTGCAAGTATAAAAAATCAGCAAAATAGTTATATTGTTA
ATAATTCATGACCCAATAACTCGTACTGTTATCTACGTGGTGAAGCCAAAAAGACGAACAGTTTAGCCTCCTCCTCCTCGGCGATCGCCAAG
CGAAATGTCATGGGAGATTGTCAGATTGAGCATTTTTTCTAAAAGCCCTTGCTAAAACAAACCATATGTCAGGGGTGTCGCCATGTTGACTA
AATTCAGCGGCTCGACCATATGGGAGAGCTCCCAACGCGTTGGATGCATAGCTTGAGTATCTATAGTGTACCTAAATAGCTTGGCGTAATCA
TGGTCATAGCTGTTTCTGTGTGAAATTTGTTATCCGCTCACAATTCACACAACATACGAGCCGGAAGCATAAAGTGTAAAGCCTGGGGTGCCT
AATGAGTGAGCTAACTCACATTAATTTGCGTTGCGCTCACTGCCCGCTTTCAGTCGGGAAACCTGTCGTGCCAGCTGCATTAATGAATCGGCCA
ACGCGCGGGGAGAGGCGGTTTGGCTATTGGGCGCTTTCGCTTCCGCTCACTGACTCGCTGCGCTCGGTCGTTTCGGCTGCGGCGAGCGGTA
TCAGCTCACTCAAAGGCGGTAATACGGTTATCCACAGAATCAGGGGATAACGCAGGAAAGACATGTGAGCAAAAGGCCAGCAAAAGGCCAGGA
ACCGTAAAAGGGCCGCTTGCTGGCGTTTTTCCATAGGCTCCGCCCCCTGACGAGCATCACAAAATCGACGCTCAAGTCAGAGGTGGCGAAA
CCCACAGGACTATAAAGATACCAGGCGTTTTCCCTGGAAGCTCCCTCGTGCCTCTCCTGTTCCGACCTGCCGCTTACCGGATACCTGTCC
GCCTTTCCCTTCGGGAAGCGTGGCGCTTCTCATAGCTACGCTAGGTTGATAGGATCTCAGTTCGGTGTAGGTCGTTTTCAGTTCGCTCCTCAAGCTGGGCTGTG
TGACGAACCCCGTTTCAGCCGACCGCTGCGCTTATCCGGTAACTATCGTCTTGAGTCCAACCCGGTAAGACACGACTTATCGCCACTGGC
AGCAGCCACTGGTAACAGGATTAGCAGAGCGAGGTATGTAGGCGGTGCTACAGAGTTCTTGAAGTGGTGGCTAACTACGGCTACACTAGAGA
ACAGTATTTGGTATCTGCGCTCTGCTGAAGCCAGTTACCTTCGGAAAAAGAGTTGGTAGCTCTTGATCCGGCAACAAACCACCGCTGGTAGCG
GTGGTTTTTTGTTTGCAGCAGCAGATTACGCGCAGAAAAAAGGATCTCAAGAAGATCCTTTGATCTTTCTACGGGGTCTGACGCTCAGTG
GAACGAAAACCTACGTTAAGGGATTTTGGTCATGAGATTATCAAAAAGGATCTTACCTAGATCCTTTTAAATTAATAAATGAAGTTTAAATCA
ATCTAAAATATATAGTAAACTTGGTCTGACAGTTACCAATGCTTAATCAGTGAAGCCATCTCAGCGATCTGTCTATTTGCTTATCCCA
TAGTTGCCTGACTCCCGCTGCTGATATAACTACGATACGGGAGGGCTTACCATCTGGCCCCAGTGTGCAATGATACCGCGAGACCCACGCTC
ACCGGCTCCAGATTTATCAGCAATAAACAGCCAGCCGGAAGGGCCGAGCGCAGAAGTGGTCCCTGCAACTTTATCCGCTCCATCCAGTCTATT
AATGTTGCCGGGAAGCTAGAGTAAGTAGTTCCGCGATTAATAGTTTGGCACAACGTTGTTGCCATTGCTACAGGCATCGTGGTGTACGCTCGT
CGTTTGGTATGGCTTCATTACGCTCCGGTTCACACGATCAAGGGGAGTTACATGATCCCCATGTTGTGCAAAAAGCGGTTAGCTCCTTCGG
```

TCCTCCGATCGTTGTCAGAAGTAAGTTGGCCGCGAGTGTATCACTCATGGTTATGGCAGCACTGCATAATTCTCTACTGTCATGCCATCCGTA  
AGATGCTTTTCTGTGACTGGTGAGTACTCAACCAAGTCATTCTGAGAATAGTGTATGCGGCGACCGAGTTGCTCTTGCCCGGCGTCAATACGGG  
ATAATACCGGCCACATAGCAGAACTTTAAAAGTGCTCATCATTGAAAAACGTTCTTCGGGGCGAAAACCTCAAGGATCTTACCGTGTTGAG  
ATCCAGTTCGATGTAACCCACTCGTGCACCCAAGTATCTTACGATCTTTTACTTTACCAGCGTTTCTGGGTGAGCAAAAACAGGAAGGCAA  
AATGCCGCAAAAAGGGAATAAGGGCGACACGGAAATGTTGAATACTCATACTCTTCCTTTTCAATATTATTGAAGCATTATCAGGGTTATT  
GTCTCATGAGCGGATACATATTTGAATGTATTTAGAAAAATAAACAAATAGGGGTTCCGCGCACATTTCCCCGAAAAGTGCCACCTGATGCGGT  
GTGAAATACCGCACAGATGCGTAAGGAGAAAATACCGCATCAGGAAATTGTAAGCGTTAATATTTGTTAAAATTGCGGTTAAATTTTGTAA  
ATCAGCTCATTTTTTAACCAATAGGCCGAAAATCGGCAAAATCCCTTATAAATCAAAGAATAGACCGAGATAGGGTTGAGTGTGTTCCAGTTT  
GGACAAGAGTCCACTATTAAAGAACGTGGACTCCAACGTCAAAGGGCGAAAACCGTCTATCAGGGCGATGGCCCACTACGTGAACCATCACC  
CTAATCAAGTTTTTTGGGGTCGAGGTGCCGTAAAGCACTAAATCGGAACCTAAAGGGAGCCCCCGATTTAGAGCTTGACGGGAAAAGCCGGCG  
AACGTGGCGAGAAAGGAAGGGAAGAAAGCGAAAGGAGCGGGCGTAGGGCGTGGCAAGTGTAGCGGTACGCTGCGCGTAACACCA

**Supplementary Figure S5.** Plasmid pSN15. The plasmid map with the main features highlighted is depicted in **A** and the FASTA formatted sequence in **B**. N15.3 – 3' homologous region for site N15; N15.5 – 5' homologous region for site N15; TT – double transcriptional terminators; Amp<sup>R</sup> – gene encoding the protein responsible for ampicillin resistance.

**A**

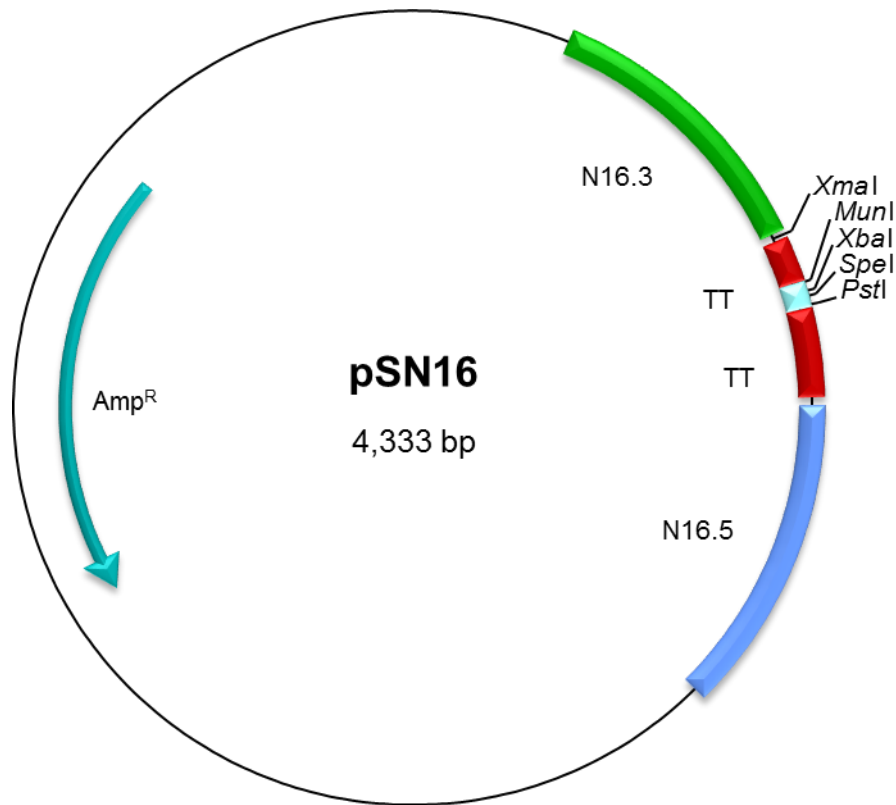

**B**

>pSN16

```
CACCCGCCGCGCTTAATGCGCCGTACAGGGCGCGTCCATTCCGCCATTAGGCTGCGCAACTGTTGGGAAGGGCGATCGGTGCGGGCCCTCTTCG
CTATTACGCCAGCTGGCGAAAGGGGGATGTGCTGCAAGGGGATTAAGTTGGGTAAACGCCAGGGTTTTCCAGTCACGACGTGTAAAACGACGG
CCAGTGAATTGTAATACGACTCACTATAGGGCGAATTGGGCCCGACGTCGCATGCTCCCGGCCGCCATGGCGGCCCGGGAAATTCGATTGTGAG
CTTGATGGTGTGGTGGGTAAAGCTTCAATGTCCATGCGCCGAGCTTGACGGTAAAAATCCGTGTCTGGGGCCAATCATTGGGAACGCTCACA
CAGATACCGTTGCGAGTTAAGTCGAAGGATACCCCAACCAATCCCTTCCATATCGAACACTTGGCAAAGGCCAACATCCGCTCTCCCTGCC
GTCGCTCTGCACCCCTGGAGATGGGCAATGGTTAGGGCTTCTTGGGAGAGGGAAGATGGAGAATCTTGAGCCATGGAGATTATTTCCCTCGGT
TAAATTAGGTTTACCTAGTAAATGGGCCAGGTTGACCATATTGTAGTCACTTCACTGGGTCGATCTTCCCTCCATCAGGGTCATTTGGTTAATT
GTTGATGAGAAATGGGAAGGAGTAATCCATAGATATTTGCCAGTAACTCGATTTGAGCAGAATGGGAAGGACGATTTGGGAACCTTTGGTTG
ACAGGGCAACAAAGCCAGCAGATTACACCCGGGAAAAAACCCTCCGCTGACAGGGCGGGGTTTTTTTTTCAGATAAAAAAATCCCTTAGCT
TTCGTAAGGATGATTTCTGCAATTGGCGCCGCTTCTAGAATGCACTAGTAGCGCCGCTGCAGTCCGGCAAAAAACGGGCAAGGTGTCACC
ACCTGCCCTTTTTCTTTAAAACGAAAAGATTACTTCGCGTTGGAGAGCGTTCCACGACAAACACAGATAAAAACGAAAGGCCAGTCTTTCG
ACTGAGCCTTTCGTTTTATTTGATGCTTGGTACCGGTTGTAATCGCTGGAGGCGAATGGGTGAGAACCATAAAAATCTGGGGAACAGGGGAAT
GTTAATGAACACACATGCGATAGGATAGCGAATTGATTTAAAGCAATTCCTCCCTGAGATAAATAATATTTTCCAGCCACTGCTCCGCTTAA
TTTTGGCGCTAATCTGGGCAAAAAATTCGTTGGTTTTCGGAAAGGTGAACCCGTAGCTAGCTTGTATTGCCAAACCTAACATCATTTGCTCCA
TGGCGGCCAAAAATCTTTAGGACAAAACGCGCCAGAGGTCAGGCTTGATTTTTTCAGAGGGAAAAATTCCTCGGCTAAATAATCAAAAAGTTG
AAAAAAAAGTTTTTCAGTAAGGTTGATGTTATATTTTATCTTATGTAGACTTTTGAAAAAACAAGTCCCGCAATCAAGCATCATTCAAC
GGAAAAAATAATCTATGCAAAACGCTCCACCCGCAATACCCGCAAAAGCATTACTCAATAAAGTTAAAGAACTATCCCATCTGCCCCGCTCGAG
AAACGGCAAAAGCCTGTGGTTACTACTCGACCATATGGGAGAGCTCCCAACGCGTTGGATGCATAGCTTGAGTATCTATAGTGTACCTAAAT
AGCTTGGCGTAATCATGGTCATAGCTGTTTCTGTGTGAAATTTGATATCCGCTCACAAATCCACACAACATACGACCCGGAAGCATAAAGTGTA
AAGCCTGGGGTGCCTAATGAGTGAGCTAACTCACATTAATTTGCGTTGCGCTCACTGCCCGCTTCCAGTCGGGAAACCTGCTGTCAGCTGCA
TTAATGAATCGGCCAACGCGCGGGGAGAGCGGTTTGGCTATTGGGCGCTTCCCGCTTCCGCTCACTGACTCGCTGCCCTCGGTCGTTTCGG
CTGCGCGAGCGGTATCAGCTCACTCAAAGCGGTAATACGGTTATCCACAGAATCAGGGGATAACGCAGGAAAGACATGTGAGCAAAAGGCC
AGCAAAAGGCCAGGAACCGTAAAAAGGCCGCTTGTGCGGTTTTTCCATAGGCTCCGCCCCCTGACGAGCATCACAAAAATCGACGCTCAAG
TCAGAGGTGGCAAAACCCGACAGGACTATAAAGATACAGGCGTTTTCCCTGGAAGCTCCCTCGTGCCTCTCCTGTTCCGACCTGCGGCTT
ACCGATACCTGTCCGCTTTCTCCCTTCGGGAAGCGTGCGCTTTCTCATAGCTCACGCTGTAGGTATCTCAGTTCGGGTAGGTCGTTTCGCT
CCAAGCTGGGCTGTGTGCACGAACCCCGTTCCAGCCGACCGCTGCGCCTTATCCGGTAACTATCGTCTTGAGTCCAACCCGGTAAAGACACGA
CTTATCGCCACTGGCAGCAGCCACTGGTAACAGGATTAGCAGAGCGAGGTATGTAGGCGGTGCTACAGAGTCTTGAAGTGGTGGCTAACTAC
GGTACACTAGAAGAACAGTATTTGGTATCTGCGCTCTGCTGAAGCCAGTTACCTTCGGAAAAAGAGTTGGTAGCTCTTGATCCGGCAACAAA
CCAGCCTGGTAGCGGTGGTTTTTTTTGTTTGCAAGCAGCAGATTACGCGCAGAAAAAAGGATCTCAAGAAGATCCCTTGATCTTTCTACGGG
GTCTGACGCTCAGTGAACGAAAACCTCACGTTAAGGGATTTGGTCAATGAGATTAACAAAAAGGATCTTACCTAGATCTTTTAAATTAAAAA
TGAAAGTTTTAAATCAATCTAAAGTATATATGAGTAAACTTGGTCTGACAGTTACCAATGTTAATCAGTGAGGCACCTATCTCAGCGATCTGTC
TATTTCTGTTTCAATAGTTGCCGACTCCCGCTCGTGTAGATAACTACGATACGGGAGGGCTTACCATCTGGCCCCAGTGTGCAATGATACCC
GCGAGACCCACGCTCACCGGCTCCAGATTTATCAGCAATAAACACGCGAGCCGGAAGGGCCGAGCGCAGAAAGTGGTCTGCAACTTTATCCGCC
TCCATCCAGTCTATTAATTTGTTGCCGGGAAGCTAGAGTAAGTAGTTCCGCAAGTTAATAGTTTGGCAACGTTGTTGCCATTGCTACAGGCATCG
TGGTGTACGCTCGTCTGTTGGTATGGCTTCATTCAGCTCCGGTTCACCAACGATCAAGGCGAGTTACATGATCCCCCATGTTGTGCAAAAAAGC
```

```
GGTTAGCTCCTTCGGTCCTCCGATCGTTGTCAGAAGTAAGTTGGCCGCAGTGTATCACTCATGGTTATGGCAGCACTGCATAATTCTCTTACT
GTCATGCCATCCGTAAGATGCTTTTCTGTGACTGGTGAGTACTCAACCAAGTCATTCTGAGAATAGTGTATGCGGCGACCGAGTTGCTCTTGCC
CGGCGTCAATACGGGATAATACCGGCCACATAGCAGAACTTTAAAAGTGTCTATCATTGGAAAACGTTCTTCGGGGCGAAAACCTCAAGGAT
CTTACCGCTGTTGAGATCCAGTTCGATGTAACCCACTCGTGCACCCAACTGATCTTCAGCATCTTTTACTTTTACCAGCGTTTCTGGGTGAGCA
AAAACAGGAAGGCAAAATGCCGCAAAAAGGGAAATAAGGGCGACACGGAAATGTTGAATACTCATACTCTTCCTTTTCAATATTATTGAGCA
TTTATCAGGGTTATTGTCTCATGAGCGGATACATATTTGAATGTATTTAGAAAAATAAACAAATAGGGGTTCCGCGCACATTTCCCCGAAAAGT
GCCACCTGATGCGGTGTGAAATACCGCACAGATGCGTAAGGAGAAAATACCGCATCAGGAAATGTAAGCGTTAATATTTGTTAAAATTCGCG
TTAAATTTTGTAAATCAGCTCATTTTTTAACCAATAGGCCGAAATCGGCAAAATCCCTTATAAATCAAAAAGAATAGACCGAGATAGGGTTGA
GTGTTGTTCCAGTTTGGAACAAGAGTCCACTATTTAAAGAAGTGGACTCCAACGTCAAAGGGCGAAAACCGTCTATCAGGGCGATGGCCCACT
ACGTGAACCATCACCTAATCAAGTTTTTTGGGGTCGAGGTGCCGTAAGCACTAAATCGGAACCTAAAGGGAGCCCCGATTTAGAGCTTGA
CGGGAAAGCCGGCAACGTGGCGAGAAAGGAAGGGAAGAAAGCGAAAGGAGCGGGCGCTAGGGCGCTGGCAAGTGTAGCGGTCACGCTGCGCG
TAACCACCA
```

**Supplementary Figure S6.** Plasmid pSN16. The plasmid map with the main features highlighted is depicted in **A** and the FASTA formatted sequence in **B**. N16.3 – 3' homologous region for site N16; N16.5 – 5' homologous region for site N16; TT – double transcriptional terminators; Amp<sup>R</sup> – gene encoding the protein responsible for ampicillin resistance.

**A**

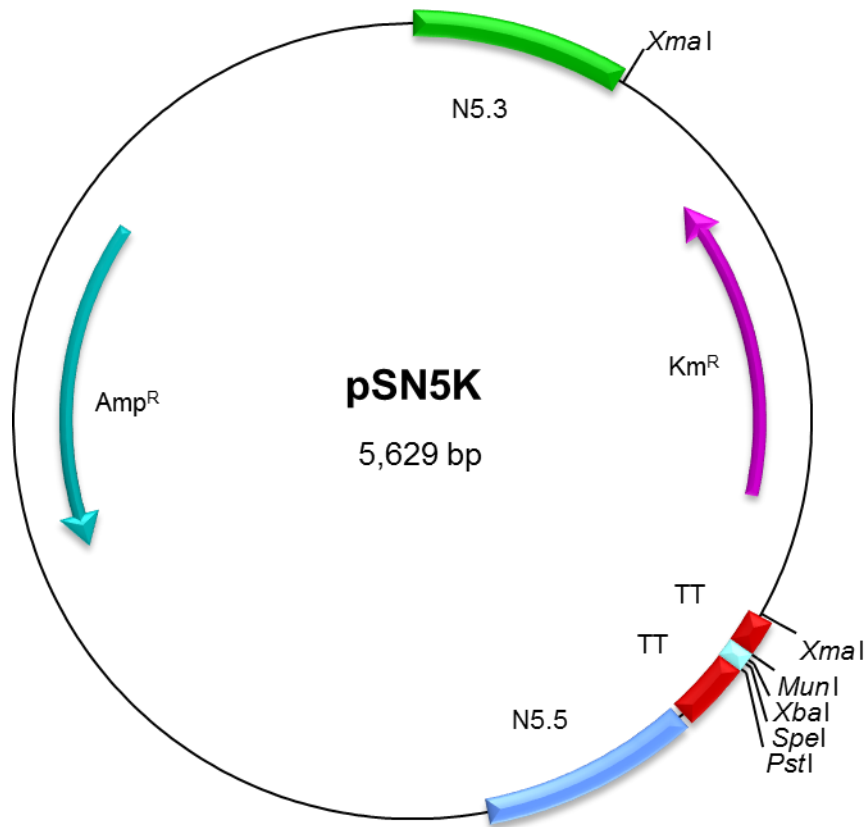

**B**

```
>pSN5K
TGTCAAAATCAGCATTTGCTCTGCCAGGTGAGACGGAGTTTTTGTCCCACTAATCCCTGTTGGATAGAAGGCGCTTGATACAGTTCCAACCAAAC
CCAATCTCCTGTCCTGGCTTTAGTTTCTCCACCCTCGGCAGGATTAACGACCCAACCACTCTCCAAAAGGCCGATAAATACGCCTCATCTAAA
TTCTGTTGACAGAGATAAATAATCTACCTGGTTGGCGGGCAACTGACTGCTAATTTGATAATCCGGGATGCGGCCAGAGGTTTCTGAGGTTGAA
ACAGCGTAGCTAGGGAAATCACCACCAGAGCGGCATCGCCACCAATACCATCCGCCAGCGCCATTGCTTCATCTGTGGACTGCCCTAAAAAATT
GCCATAAAAAACACCTGGGGCGTCTTTCCTGTTTCGACTCCAGATGTTTTTCTAATTTCTCACACCTGTCTAAGTATAAATCACCACCGG
GGATTGTCAAGGCTTCAGGATTACACCCGGGCGATTTACTTTTCGACCTCATTTCTATTAGACTCTCGTTTGGATTGCAACTGGTCTATTTTCTC
CTTTTGTGATAGAAAATCATAAAAGGATTTGCAGACTACGGGCGCTAAAGAATAAAAAATCTATCTGTTTCTTTTCATCTCTGTATTTTTT
ATAGTTTCTGTTGCATGGGCATAAAGTTGCCTTTTAAATCACAATTCAGAAAATATCATAATATCTCATTTCACATAAATAATAGTGAACGGCAG
GTATATGTGATGGGTTAAAAAGGATCGATCCTCTAGCGAACCCAGAGTCCCGCTCAGAAGAATCGTCAAGAAGGCGATAGAAGGCGATGCGC
TGCGAATCGGGAGCGGCATACCGTAAAGCACGAGGAAGCGGTACGCCCATTCGCGCCAAAGCTTTCAGCAATATCACGGGTAGCCAACGCTA
TGTCTGATAGCGGTCCGCCACACCCAGCCGCGCCAGTGCATGAATCCAGAAAAGCGGCCATTTTCCACCATGATATTCGGCAAGCAGGCATC
GCCATGGGTCACGACGAGATCCTCGCCCTCGGGCATCCCGCCCTTGAGCCTGGCGAACAGTTCGGCTGGCGCGAGCCCTGATGCTCTCGTCC
AGATCATCCTGATCGACAAGACCGGCTTCCATCCGAGTACGTGCTCGCTCGATGCGATGTTTCGCTTGGTGGTTCGAATGGGCAGGTAGCCGGAT
CAAGCGTATGCAGCCGCGCATTCGATCAGCCATGATGGATACTTTCTCGGCAGGAGCAAGGTGAGATGACAGGAGATCCTGCCCGGCACTTC
GCCCAATAGCAGCCAGTCCCTTCCCGCTTCAGTGACAACGTTCGAGCACAGCTGCGCAAGGAACGCCCGCTCGTGGCCAGCCACGATAGCCGCGCT
GCCTCGCTCTGGAGTTTCATTCAGGACACCGGACAGGTTCGCTTTCGACAAAAGAACCAGGCGCCCTGCGCTGACAGCCGGAACAGGCGGCAT
CAGAGCAGCCGATTTGCTGTTGTGCCAGTCATAGCCGAATAGCCTCTCCACCCAAGCGGCGGAGAACCTGCGTGAATCCATCTGTTCAAT
CATCGAAAACGATCTCATCTGCTCTTGTATCAGATCTTGATCCCTCGGCCATCAGATCCTTGGCGGCAAGAAAGCCATCCAGTTTACTTTG
CAGGGCTTCCCAACCTTACCAGAGGGCGCCCGCTGCGCAATTCGGTTCGCTTGTGTCATAAAAACCGCCAGTCTAGCTATCGCCATGTAA
GCCACTGCAAGCTACCTGCTTTTCTTTGCGCTTGCCTTTCCCTTGTCCAGATAGCCAGTAGCTGACATTCACCCGGGAAAAAAAACCCC
GCCCTGACAGGGCGGGGTTTTTTTTTTCAGATAAAAAAATCCTTAGCTTTCGCTAAGGATGATTTCTGCAATTTGGCGGCCGCTCTAGAAATGCA
CTAGTAGCGGCCGCTGACGTCGCGCAAAAAACGCGCAAGGTGTCAACACCCTGCCCTTTTCTTTTAAACCAGAAAGATTAATCTCGCGTTGGA
GAGCGTTCACCGACAAAACAACAGATAAAAACGAAAGGCCAGTCTTTTCGACTGAGCCTTTTCGTTTTATTTGATGCCTGGTACCGGGTGAATCGG
TTGATTATTTTCAGTGGCCCGGCCGATGGATAATTACCATGGCCCGACCGACCGGATTTCCAGACCAGTTTGAACAGTATTAATTAGCCTTTC
CGGACAAGGCCTCTGTGAAAATCTTAAAAAAGTATTAAGATTTTAAAAGCTAGCTTATTTTCGGAGGAAATGTGTTTACTCGACTTGCCAGCA
ACACCCGATTTTCGTGAAGATTTAGTCAATGAGCTTGAGGGCTTTGGCCACTGTGCTCGAAAATCGGGGCTACATTTGCTTCTTGCTACACCTGT
GGCGACCAACTCAACAGCGCCTCCTTCATGGTGAAGCTTTGGGGGAAAATCATCTGATCCGCTTTTTTGGTATCGGACTACGGCATCACTGGACAG
AAATGCGGGATGACCGAGAATTAATGAAATTAGAAGGAGCGGAGCGGATCGCCAGTGGGAAGAATTTGGCCAATGTGGTCAAATATGCTTACG
AGATGCCCCACTCGACCATATGGGAGAGCTCCCAACCGGTTGGATGCATAGCTTGAAGTATCTATAGTGTACCTAAATAGCTTGGCGTAAAT
ATGTTCAATAGCTGTTTCTGTTGAAATTTGTTATCCGCTCACAATTCACACAACATACGAGCCGGAAGCATAAAGTGTAAAGCCTGGGGTGGC
TAATGAGTGAAGTAACTCACAATTAATGCGTTGCGCTCACTGCGGCTTTCCAGTCCGGAAACCTGTCGTCGACGCTGCAATTAATGAATCGGCC
AACGCGCGGGGAGAGCGGTTTTCGCTATTGGGCGCTTTCGCTTCTCGCTCACTGACTCGCTCGCTCGGTCGTTTCGGTTCGCGCGAGCGGT
ATCAGCTCACTCAAAGGCGGTAATACGGTTATCCACAGAATCAGGGGATAACGCAGGAAGAACAATGTGAGCAAAAAGGCCAGCAAAAAGCCAGG
```

```
AACCGTAAAAAGCCGCGTTGCTGGCGTTTTTCCATAGGCTCCGCCCCCTGACGAGCATCACAAAAATCGACGCTCAAGTCAGAGGTGGCGAA
ACCCGACAGGACTATAAAGATACCAGGCGTTTTCCCCCTGGAAGCTCCCTCGTGGCGCTCTCCTGTTCCGACCCTGCCGCTTACCCGGATACTGTG
CGCCTTCTCCCTTCGGGAAGCGTGGCGCTTCTCATAGCTCACGCTGTAGGTATCTCAGTTCGGTGTAGGTGCTTCGCTCCAAGCTGGGCTGT
GTGCACGAACCCCGCTTACGCCGACCGCTGCGCCTTATCCGGTAACTATCGTCTTGTAGTCCAACCCGGTAAGACACGACTTATCGCCACTGG
CAGCAGCCACTGGTAACAGGATTAGCAGAGCGAGGTATGTAGGCGGTGCTACAGAGTTCTTGAAGTGGTGGCCTAACTACGGCTACACTAGAAG
AACAGTATTTGGTATCTGCGCTCTGCTGAAGCCAGTTACCTTCGGAAAAAGAGTTGGTAGCTCTTGATCCGGCAAAACAAACCACCCTGGTAGC
GGTGGTTTTTTTGTGTTGCAAGCAGCAGATTACGCGCAGAAAAAAGGATCTCAAGAAGATCCTTTGATCTTTTCTACGGGGTCTGACGCTCAGT
GGAACGAAAACTCACGTTAAGGGATTTTTGGTCAATGAGATTATCAAAAAGGATCTTACCTAGATCCTTTTAAATTAATAAAGTAAATTAATC
AATCTAAAGTATATATGAGTAAACTTTGGTCTGACAGTTACCAATGCTTAATCAGTGAGGCACCTATCTCAGCGATCTGTCTATTTTGTTCATCC
ATAGTTGCTGACTCCCGCTCGTGTAGATAAATACGATACGGGAGGGCTTACCATCTGGCCCCAGTGTGCAATGATACCCGCGAGACCCACGCT
CACCGGCTCCAGATTTATCAGCAATAAACAGCCAGCCGGAAGGGCCGAGCGCAGAAGTGGTCTTCAACTTTTATCCGCTCCATCCAGTCTAT
TAATTTGTTGCCGGGAAGCTAGAGTAAGTGTTCGCCAGTTAATAGTTTGCACAAGTTGTTGCCATTGCTACAGGCATCGTGGTGTACAGGCTCG
TCGTTTGGTATGGCTTCAATCAGCTCCGTTCCCAACGATCAAGGCGAGTTACATGATCCCCATGTTGTGCAAAAAAGCGGTTAGCTCCTTCG
GTCTCCGATCGTTGTGCAAGTAAAGTTGGCCGAGTGTATCACTCATGGTTATGGCAGCACTGCATAATTTCTTACTGTATGCCATCCGT
AAGATGCTTTTCTGTGACTGAGTACTCAACCAAGTCAATCTGAGAATAGTGTATGCGGCGACCGAGTTGCTCTGCCCCGCGTCAATACGG
GATAAATACCGGCCACATAGCAGAACTTTAAAAAGTGTCTCATTTGGAAAACGTTCTTCGGGGCGAAAACTCTCAAGGATCTTACCCTGTGTA
GATCCAGTTCGATGTAACCCACTCGTGCACCCAATGATCTTACGATCTTTTACTTTTACCAGCGTTTCTGGGTGAGCAAAAACAGGAAGGCA
AAATGCCGCAAAAAAGGGAATAAGGGCGACACGAAATGTTGAATACTCATACTCTTCTTTTCAATATATTGAAAGCATTTATCAGGGTTAT
TGCTCATGAGCGGATACATATTTGAATGTATTTAGAAAAATAAACAAATAGGGGTTCCGCGCACATTTCCCGAAAAGTGCACCTGATGCGG
TGTGAAATACCGCACAGATGCGTAAGGAGAAAAATACCGCATCAGGAAATGTAAGCGTTAATATTTTGTAAAAATTCGCGTTAAATTTTTGTTA
AATCAGCTCATTTTTTAACCAATAGGCCGAAATCGGCAAAATCCCTTATAAATCAAAGAATAGACCGAGATAGGGTTGAGTGTGTTCCAGTT
TGGAAACAAGAGTCCACTATTAAGAACGTGGACTCCAACGTCAAAGGGCGAAAAACCGTCTATCAGGGCGATGGCCCACTACGTGAACCATCAC
CCTAATCAAGTTTTTTGGGGTCGAGGTGCCGTAAGCACTAAATCGGAACCTAAAGGGAGCCCCGATTTAGAGCTTGACGGGGAAAGCCGCG
GAACGTGGCGAGAAAGGAAGGAAAGCAAGGAGCGGGCGCTAGGGCGCTGGCAAGTGTAGCGGTACGCTGCGCGTAACCCACACCC
GCCGCGTTAATGCGCCGCTACAGGGCGCTCCATTGCCATTACGGCTGCGCAACTGTTGGGAAGGGCGATCGGTGCGGGCCTCTTCGCTATT
ACGCCAGCTGGCGAAAGGGGATGTGCTGCAAGGCGATTAAGTTGGGTAAAGGCGAGGGTTTTCCAGTACGACGTTGTAATAACGACGGCCAGT
GAATTGTAATACGACTACTATAGGGCAATTGGGCCCCGACGTCGCATGCTCCCGGCCCATGGCGGCCGGGAATTCGAT
```

**Supplementary Figure S7.** Plasmid pSN5K. The plasmid map with the main features highlighted is depicted in **A** and the FASTA formatted sequence in **B**. N5.3 – 3’ homologous region for site N5; N5.5 – 5’ homologous region for site N5; TT – double transcriptional terminators; Amp<sup>R</sup> – gene encoding the protein responsible for ampicillin resistance; Km<sup>R</sup> – gene encoding the protein responsible for neomycin/kanamycin resistance.

A

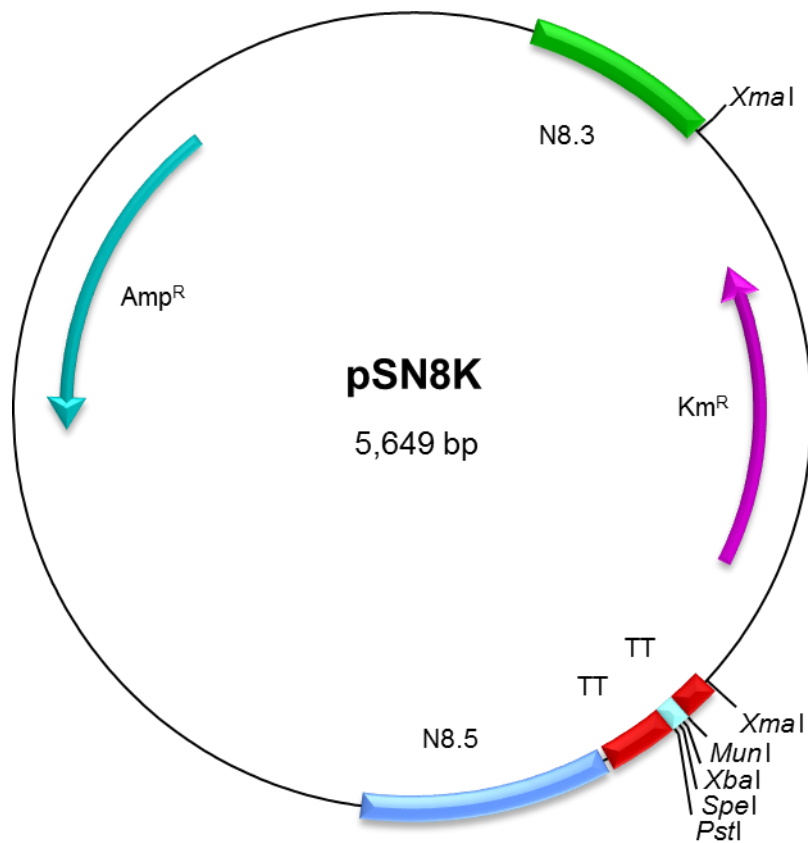

B

>pSN8K

```
CACCCGCCGCGCTTAATGCGCCGTACAGGGCGCGTCCATTCCGCCATTCAGGCTGCGCAACTGTTGGGAAGGGCGATCGGTGCGGGCCTCTTCG
CTATTACGCCAGCTGGCGAAAGGGGGATGTGCTGCAAGGCGATTAAGTTGGGTAACGCCAGGGTTTTCCAGTACAGACGTTGTAACACGACGG
CCAGTGAATTGTAATACGACTCACTATAGGGCGAATTGGGCCGACGTCGCATGCTCCCGCCGCCATGGCGCGCGGGAATTCGATTGATGA
CCGCTGGCGGAGTTTAGTCCAGGGTTATTTGTACCGTCAAGGTTACATTGCCACCCAGATTTAACTACGCTGCGAGTCCGTACCATTGGCGAT
CGGGCCTATCTCACCATTAAAGGTAAAAATGCCAGCATTGCCCGCTTGGATTTGAGTATGAAATTCCTGCAAGTGGAGCCAAATTAATTTTAC
AGAATCTGTTACCGCCCTGATTGAAAAATCGTTATTGCCTCGATTACCATGGTAAAACTGAGAAGTAGACGAGTTTTTGGGGGATAAAC
AGGTCTAATTTAGCGGAAGTGAATTAACCTACACTGGTAAAAAATAAGTCTACTTCCCTGGATCGGGGAAGAGGTAAACGGATGATGCCCG
CTATTACAACGTCATTTAGCCCAACATCCCTACAAAAATGGTGACAAGATTACACCCGGGCGATTTACTTTTGCACCTCATTTCTATTAGACT
CTGTTTGGATTGCAACTGGTCTATTTTCTCTTTTGTGTTGATAGAAAAATCATAAAAGGATTTGCAGACTACGGGCTAAAGAATAAAAATC
TATCTGTTCTTTTCATTTCTGTATTTTTTATAGTTTCTGTTGCATGGGCATAAAGTTGCCTTTTTAATCACAATTCAGAAAAATATCATAATA
TCTATTTCACTAAATAATAGTGAACGGCAGGTATATGTGATGGGTTAAAAAGGATCGATCCTCTAGCGAACCCAGATCCCGCTCAGAAAGAA
CTCGTCAAGAAGCGATAGAAGCGATGCGCTGCGAATCGGGAGCGCGATACCGTAAAGCACGAGGAAGCGGTAGCCCATTCGCGCCCAAGC
TCTTCAGCAATATCACGGGTAGCCAACGCTATGTCTGTAGCGGTCCGCCACACCCAGCCGGCCACAGTCGATGAATCCAGAAAAGCGGCCAT
TTCCACCATGATATTCGGCAAGCAGGCATCGCCATGGGTACGACGAGATCCTCGCCGTCGGGCATCCGCGCCTTGAGCCTGGCGAACAGTTC
GGTGGCGGAGCCCTGATGCTCTTCTGTCAGATCATCTGATCGACAAGACCCGCTCCATCCGAGTACGTGCTCGTTCGATGCGATGTTTC
GCTTGGTGGTCAATGGGCGAGTAGCCGGATCAAGCGTATGCAGCCGCCATTGCATCAGCCATGATGGATACTTTCTCGGCAGGAGCAAGGT
GAGATGACAGGAGATCCTGCCCCGCACTTCGCCCAATAGCAGCCAGTCCCTTCCCGCTTCAGTGACAACGTCGAGCACAGCTGCGCAAGGAAC
GCCCGTCTGGCCAGCCAGATAGCCCGCTGCCTCGTCTTGGAGTTCAATTCAGGGCACCGGACAGGTTCGGTCTTGACAAAAAGAACCGGGCGC
CCCTGCGCTGACAGCCGGAACAGCGCGGCATCAGAGCAGCGGATGTCTGTTGTGCCAGTCAATAGCCGAATAGCCTCCACCCAAAGCGGCCG
GAGAACCTGCGTGAATCCATCTTGTTCATCATGCGAAACGATCCTCATCTCTGTCCTTGCATCAGATCTTGATCCCTGCGCCATCAGATCCT
TGCGGCAAGAAAGCCATCCAGTTTACTTTGCAGGGCTTCCCAACCTTACCAGAGGGCGCCCGAGCTGGCAATCCGGTTTCGCTTGTGTCAT
AAAACCGCCAGCTAGCTATCGCCATGTAAGCCACTGCAAGCTACCTGCTTTTCTTTGCGCTTGCCTTTTCCCTTGTCCAGATAGCCAGT
AGCTGACATTCACCCGGGAAAAAACCCCGCCCTGACAGGGCGGGTTTTTTTTTCAGATAAAAAAATCCTTAGCTTTCGCTAAGGATGAT
TTCTGCAATTTGGCGCCGCTTCTAGAATGCACTAGTAGCGGCCGCTGCACTCCGGCAAAAAAACCGGCAAGGTGTCACCCCTGCCCTTTTTTC
TTTTAAACCGAAAAGATTACTTCGCGTTGGAGAGCGTTCCAGCAACAACAGATAAAACGAAAGGCCAGTCTTTCGACTGAGCCTTTCGTT
TTATTTGATGCTTGGTACCGGGTGAATCCTTCAATTTCCCTATTGTTATTAATAGTGTCTGAAACTAACAAAATAGCAAGATCAAATTTGTGAA
GAAAACGCAACAAAATGAACCTAAGATAATTTCTGTATCTTGGCTGGTATATTCAGTCTACTCAGAAATGAGTTTGTTTTATGACAAAT
CAGTATGTACCAATTAATCTGGCGCAATCGATCCTGGTAACTCTATTTTGTGTTACCCCTGGGTATTGTGGCATTATCAAAGCATCGGAAG
TTAATCTCGTTTAGCTTACGGGACTATGAAGGCGCTGTAAGGCTTCCAAGGAAGCGAAAAAGTTTTGTTGGTGGTCCCTTGGTGCCGGCAT
AATTTTCAATGCCATCTATTTTGTGCTAGTGGTTATTGCCGCGCTTTTGGTTCAGTAATTAAGTTACATTTTTTGTACTTGCCTTGTTCACCA
TTCATTAACGAATACCATGTTTAGTTTGAATAATTTCCCATCTCCATTACTATCCGTAAGGCCAAGGAATATTTAGTATTCACCTTTGGTA
ACCTAACCAATTTGCTGGCCTCGACCATATGGGAGAGCTCCCAACGCGTTGGATGTCATAGCTTGAATATCTATAGTGTACCTAAAT
AGCTTGGCGTAATCATGGTCATAGCTGTTTCTGTGTGAAATTTGTTATCCGCTCACAAATCCACACAACATACGAGCCGGAAGCATAAAGTGA
```

```
AAGCCTGGGGTGCCTAATGAGTGAGCTAACTCACATTAATTGCGTTGCGCTCACTGCCCGCTTTCCAGTCGGGAAACCTGTCGTGCCAGCTGCA
TTAATGAATCGGCCAACCGCGCGGGGAGAGGCGGTTTTCGCTATTGGGGCGCTCTCCGCTTCCCTCGCTCACTGACTCGCTGCCGCTCGGTTCGG
CTGCGGGCAGCGGTATCAGCTCACTCAAAGGCGGTAATACGGTTATCCACAGAATCAGGGGATAACGCAGGAAAGAACATGTGAGCAAAAGGCC
AGCAAAAGGCCAGGAACCGTAAAAAGGCCGCGTTGCTGGCGTTTTTCCATAGGCTCCGCCCCCTGACGAGCATCACAAAAATCGACGCTCAAG
TCAGAGGTGGCGAAACCCGACAGGACTATAAAGATACCAGGCGTTTCCCCCTGGAAGCTCCCTCGTGCCTCTCCTGTTCCGACCCTGCCGCTT
ACCGGATACCTGTCCGCCTTCTCCCTTCGGGAAGCGTGGCGCTTCTCATAGCTCACGCTGTAGGTATCTCAGTTCGGTGTAGGTGCTTCGCT
CCAAGCTGGGCTGTGTGCAGAACCCCGCTTTCAGCCCGACCGCTGCGCCTTATCCGGTAACTATCGTCTTGAGTCCAACCCGGTAAAGACAGCA
CTTATCGCCACTGGCAGCAGCCACTGGTAAACAGGATTAGCAGAGCGAGGTATGTAGGCGGTGCTACAGAGTCTTGAAGTGGTGGCTAACTAC
GGTACACTAGAAAGACAGTATTTGGTATCTGCGCTCTGTGAAGCCAGTTACCTTCGGAAAAAGAGTTGGTAGCTCTTGATCCGGCAAAACAAA
CCACCGCTGGTAGCGGTGGTTTTTTTGTGTTGCAAGCAGCAGATTACGCGCAGAAAAAAGGATCTCAAGAAGATCCCTTGATCTTTTCTACGGG
GTCTGACGCTCAGTGGAAAGAAACTCAGTTAAGGGATTTTGGTCATGAGATTATCAAAAAGGATCTTACCTAGATCCCTTTAAATTAATAA
TGAAGTTTTAAATCAATCTAAAGTATATATGAGTAAACTTGGTCTGACAGTTACCAATGCTTAATCAGTGGGCACTATCTCAGCGATCTGTC
TATTTTCGTTTCATCAGTGTGCTGACTCCCCGTCGTGTAGATAACTACGATACGGGAGGGCTTACCATCTGGCCCCAGTCTGCAATGATACC
GCGAGACCCACGCTCACCGGCTCCAGATTTATCAGCAATAAACAGCCAGCCGGAAGGGCCGAGCGCAGAAAGTGGTCTGCAACTTTATCCGCC
TCCATCCAGTCTATTAATTGTTGCCGGGAGCTAGAGTAAGTAGTTCGCGAGTTAATAGTTTGGCAACGTTGTTGCCATTGCTACAGGCATCG
TGGTGTACGCTCGTTCGTTTGGTATGGCTTCATTCAGCTCCCGTTCCCAACGATCAAGGGCAGTTACATGATCCCCATGTTGTGCAAAAAAGC
GGTTAGCTCCTTCGTTCCGATCGTTGTCAGAAAGTAAAGTTGGCCGAGTGTATCACTCATGGTTATGGCAGCACTGCATAATCTCTTACT
GTCATGCCATCCGTAAGATGCTTTTCTGTGACTGGTGAGTACTCAACCAAGTCAATCTTGAGAATAGTGTATGCGGCGACCGAGTTGCTCTTGC
CGCGCTCAATACGGGATAATACCGGCCACATAGCAGAACTTTAAAAGTGCTCATATTGAAAAACGTTCTTCGGGGCGAAAACCTCAAGGAT
CTTACCGCTGTTGAGATCCAGTTTCGATGTAACCCACTCGTGCACCCAACGATCTTCAGCATCTTTTACTTTACCAGCGTTTCTGGGTGAGCA
AAAACAGGAAGGCAAAATGCCGCAAAAAAGGGAATAAGGGCGACACGGAATGTTGAATACTCATACTCTTCCTTTTCAATATTATTGAAGCA
TTTATCAGGGTTATTTGCTCATGAGCGGATACATATTTGAATGATTTAGAAAAATAAACAAATAGGGGTTCCCGGCACATTTCCCGCAAAAGT
GCCACCTGATGCGGTGTGAAATACCGCACAGATGCGTAAGGAGAAAAATACCGCATCAGGAAATGTAAGCGTTAATATTTGTTAAAATTCGGG
TTAAATTTTGTAAATCAGCTCATTTTTTAACCAATAGGCCGAAATCGGCAAAATCCCTTATAAATCAAAAGAAATAGACCGGATAGGGTTGA
GTGTTGTTCCAGTTTGAACAAGAGTCCACTATTAAGAAGCTGGACTCCAACGTCAAAAGGGCGAAAAACCGTCTATCAGGGCGATGGCCCACT
ACGTGAACCATCACCTAATCAAGTTTTTTGGGGTCGAGGTGCCGTAAGCACTAAATCGGAACCTAAAGGGAGCCCCGATTTAGAGCTTGA
CGGGAAAGCCGGCAACGTGGCGAGAAAGGAAGGAAAGCAAGGAGCGGGCGCTAGGGCGCTGGCAAGTGTAGCGGTACGCTGCGCG
TAACCACCA
```

**Supplementary Figure S8.** Plasmid pSN8K. The plasmid map with the main features highlighted is depicted in **A** and the FASTA formatted sequence in **B**. N8.3 – 3' homologous region for site N8; N8.5 – 5' homologous region for site N8; TT – double transcriptional terminators; Amp<sup>R</sup> – gene encoding the protein responsible for ampicillin resistance; Km<sup>R</sup> – gene encoding the protein responsible for neomycin/kanamycin resistance.



**A**

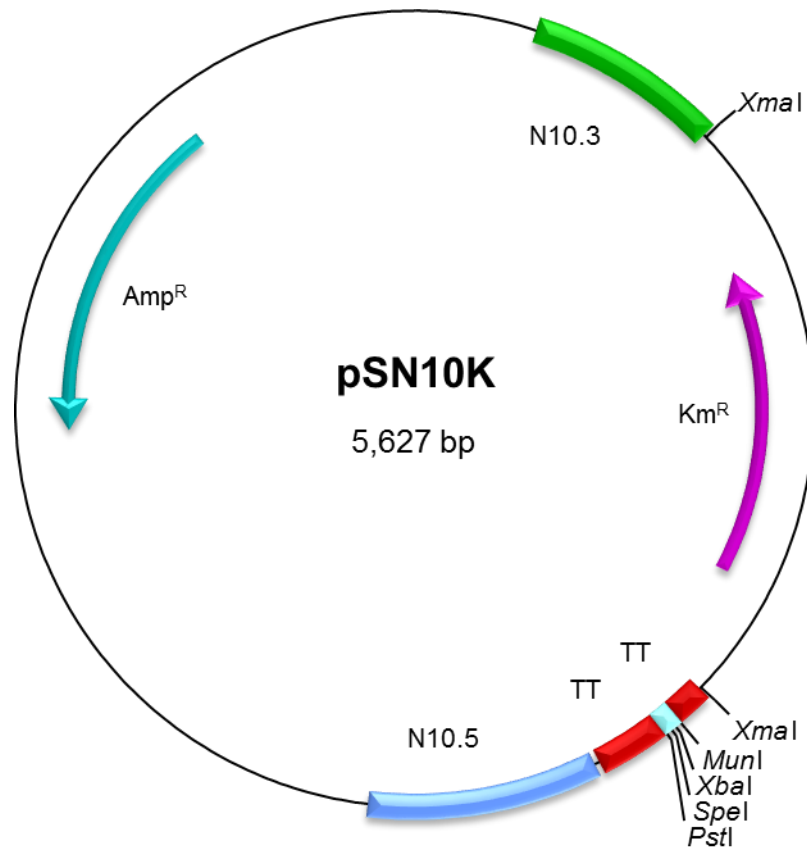

**B**

>pSN10K

```
CACCCGCCGCGCTTAATGCGCCGCTACAGGGCGCGTCCATTCGCCATTCAAGGCTGCGCAACTGTTGGGAAGGGCGATCGGTGCGGGCCCTCTTCG
CTATTACGCCAGCTGGCGAAAGGGGATGTGCTGCAAGGCGATTAAAGTTGGGTAACGCCAGGGTTTTCCAGTCACGACGTTGTAAAACGACGG
CCAGTGAATTGTAATACGACTCACTATAGGGCGAATTGGGCCCGACGTCGCATGCTCCCGGCCGCATGGCGGCCGCGGGAATTCGATTGGACT
GACCCAAGATACAGTGGTAGCTTCAAGTTCGTCAATCAACCCCAATGAAAGCTGAGATAATCTGTTGTTGATGCGACCCGCTCTTCAATTTAGCT
AAAAAGACAAGTCTGTGGCTAGTTACTATGACGAGGCCATCGGGTCTATCCAGCGGTCTTGCTGATTCCAAAACCTGGCGATTTTCTGAAGTA
GTATCTTTTACCAGCTTAAGCCGCCAAGGCTCTGGATGAGCTTGGTCGAATCATCTTTGATGCCTCGACATCGGAATAACTTTGTAAACGAC
CTTCCCGAGCTTGAATGCAAAGTCGGTTAGATTATCCATCAGAGTTGAATGCCGATAATACAGACTGCTATACTATTTAATGAAAAGAGTGCT
GGCAAGCAAGCCCGCCGAACGTTGAAGCTGTGCAGCGCAACGAAGCGCATTTGATGTTTGCCTCGGATTACACCCGGGCGATTTACTTTTCGA
CCTCATTTCTATTAGACTCTCGTTTGGATTGCAACTGGTCTATTTTCTCTTTTGTGTTGATAGAAAATCATAAAAGGATTTGCAGACTACGGGCC
TAAAGAACTAAAAATCTATCTGTTTCTTTTTCATCTCTGTATTTTTTATAGTTTCTGTTGCATGGGCATAAAGTTGCCTTTTAAATCACAAAT
CAGAAAATATCATAATATCTCATTTCACTAAATAATAGTGAACGGCAGGTATATGTGATGGGTTAAAAAGGATCGATCCTTAGCGAACCCAG
AGTCCCGCTCAGAAGAAGTCTGTCAGAAGGCGATAGAAGGCGATGCGCTGCGAATCGGGAGCGCGATACCGTAAAGCACGAGGAAGCGGTGAG
CCCATTCCGCCCAAGCTCTTACGAATATCACGGGTAGCCAACGCTATGTCTGATAGCGGTCCGCCACACCCAGCCGGCCACAGTCGATGAA
TCCAGAAAAGCGGCCATTTTCCACCATGATATTCGGCAAGCAGGCATCGCCATGGGTGACGACGATCCTCGCCGTCGGGCATCCGCGCCTTG
AGCTGGCGAACAGTTCCGGCTGGCGGAGCCCCGATGCTCTTCCGTCCAGATCATCTGATCGACAAGACCCGGCTTCCATCCGAGTACGTGCTC
GCTCGATGCGATGTTTCGTTGGTGGTTCGAATGGGCAGGTAGCCGGATCAAGCGTATGCAAGCCGCGCATGTCATGACCCATGATGATGATCTT
CTCGGCAGGAGCAAGGTGAGATGACAGGATCCTGCCCGGCACTTCGCCCAATAGCAGCCAGTCCCTTCCCGCTTCAAGTACAAAGTTCGAGC
ACAGCTGCGCAAGGAACGCCGCTGTTGGCCAGCCACGATAGCCCGCTGCCTCGTCTTGGAGTTCATTCAGGGCACCGGACAGGTGCGTCTGTA
CAAAAAGAACCCGGCGCCCTGCGCTGACAGCCGGAACACGGCGGCATCAGAGCAGCCGATTTGCTGTTGTGCCAGTCAAGCCGAATAGCCT
CTCCACCAAGCGCGGAGAACCTGCGTGCATCCATCTTGTTCATCATGCGAAGCATCCTCATCCTGTCTTGTATGATAGATCTTGTATCCC
CTGCGCCATCAGATCCTTGGCGGCAAGAAAGCCATCCAGTTTACTTTGAGGGCTTCCCAACCTTACCAGAGGGCCCGCCAGCTGGCAATCCG
GTTCCGCTTGTGTCATAAAACCGCCAGTCTAGCTATCGCCATGTAAGCCACTGCAAGCTACCTGCTTCTCTTTCGCTTGCCTTTTCCCT
TGTCAGATAGCCAGTAGCTGACATTCACCCGGGAAAAAAAACCCCGCCCTGACAGGGCGGGTTTTTTTTTTCAGATAAAAAAATCCTTAG
CTTTCGCTAAGGATGATTTCTGCAATTGGCGGCCGCTTCTAGAATGCACTAGTAGCGCCGCTGCAGTCCGGCAAAAAACGGCAAGGTGTCA
CCACCTGCCCTTTTTTTTAAACCGAAAAGATTACTTCGCGTTGGAGAGCGTTTACCAGCAAAACAACAGATAAAAACGAAAGGCCAGTCTTT
CGACTGAGCCTTTTCGTTTTATTTGATGCTTGGTACCGGGTGAATCCCCATACTCAGCCTTCTAATGCTGAGAGAATGCCTGAAAAGAACCACT
AAGTCAAAATATTTGGATTAAGTTTTTAAAGTCAACGGAGGTGTCAGATAGCATTTAGATCGTAAAAGCATACGGCATGAACAACCATGAACG
GCTTCCAGAGGTTAACCCAGGTTTATGTTTACCAAAATCCCTGACTTTTTCCGAGTTGGGGACAAAATCAACTAATTTGGCGCAGCATTT
TTTTCTGCTATCTGGCGATCGCCATGTTTGTCTAACTTCTGATCCAACCTAGGTTTTTGGGGGCTTTCCAACAAAAAATCCAGTTGCCCGCGA
AAAATTGCTGGTGGGACACAATTTGGTGTCTCCGTAGTTCTGCAAACTGCCAGTAAAACCTTGCCTTCCGCAAAACCATCCCTGGTGAGGGA
AATAATCGGGACTTCTAACTTTAACGCTTCAGCAAAAGGTACCAAAACAGGCTTGGAAAAATACCCGTCGCGCAAGGGGCATTAATCCACCGGG
CGACTCGACCATATGGGAGAGCTCCCAACCGCTGGATGCATAGCTTGAATTTCTATAGTGTACCTAAATAGCTTGGCGTAATCATGGTCAAT
```

```

AGCTGTTTCTGTGTGAAATTGTTATCCGCTCACAAATTCACACAAACATACGAGCCGGAAGCATAAAGTGTAAGCCTGGGGTGCCTAATGAGT
GAGCTAACTCACATTAATTGCGTTCGCGTCACTGCCCGCTTCCAGTTCGGGAAACCTGTCGTGCCAGCTGCATTAATGAATCGGCCAACCGCGG
GGGAGAGGGGGTTTGCATATTGGGCGCTTCCGCTTCCGCTCACTGACTCGCTGCGCTCGGTGCTTCCGCTGCGGCGAGCGGTATCAGCTC
ACTCAAAGGGCGTAAATACGGTTATCCACAGAATCAGGGGATAACGAGGAAAGAATGTGAGCAAAAAGGCCAGCAAAAAGGCCAGGAACCGTAA
AAAGGCCGCGTTCGTCGGCTTTTCCATAGGCTCCGCCCCCTGACGAGCATCACAAAAATCGACGCTCAAGTCAGAGGTGGCGAAACCCGACA
GGACTATAAAGATACCAGGCGTTTCCCCCTGGAAGCTCCCTCGTGCCTCTCCTGTTCCGACCCTGCCGCTTACCGGATACTGTCCGCTTTC
TCCCTTCGGGAAGCGTGGCGCTTCTCATAGCTCAGCTGTAGGTATCTCAGTTCGGTGTAGGTGCTTCCGCTCCAAGCTGGGCTGTGTGCACGA
ACCCCCGTTTCAGCCGACCGCTGCGCTTATCCGGTAACTATCGTCTTGAGTCCAACCCGGTAAGACACGACTTATCGCCACTGGCAGCAGCC
ACTGGTAACAGGATTAGCAGAGCGAGGTATGTAGGCGGTGCTACAGAGTCTTGAAGTGGTGGCTAACTACGGTACACTAGAAGAACAGTAT
TTGGTATCTGCGCTCTGCTGAAGCCAGTTACCTTCGGAAAAAGAGTTGGTAGCTCTTGATCCGGCAAAACAAACCACCGCTGGTAGCGGTGGTTT
TTTTGTTTGAAGCAGCAGATTACGCGCAGAAAAAAGGATCTCAAGAAGATCCTTTGATCTTTTCTACGGGGTCTGACCGTCAGTGGAAACGAA
AACTCACGTTAAGGGATTGTTGGTATGAGATTATCAAAAAGGATCTTCACTAGATCCTTTTAAATTAATAATGAAGTTTAAATCAATCTAAA
GTATATATAGTAAACTTGGTCTGACAGTTACCAATGCTTAATCAGTGAAGCACCTATCTCAGCGATCTGTCTATTTTCGTTTCATCCATAGTTC
CTGACTCCCCGTCGTGTAGATAACTACGATACGGGAGGGCTTACCATCTGGCCCCAGTGTGCAATGATACCGCGAGACCCACGCTCACCGGCT
CCAGATTTATCAGCAATAAACAGCCAGCCGGAAGGGCCGAGCGCAGAGTGGTCTGCAACTTTATCCGCTCCATCCAGTCTATTAATTTGTT
GCCGGAAAGCTAGAGTAAGTAGTTCCGCAAGTTAATAGTTTGCAGCAAGTTGTTGCCATTGCTACAGGCATCGTGGTGTACGCTCGTTCGTTGG
TATGGCTTCACTCAGCTCCGGTTCCCAACGATCAAGGCGAGTTACATGATCCCCATGTTGTGCAAAAAAGCGGTAGCTCCTTCGGTCCCTCG
ATCGTTGTCAGAAGTAAGTTGGCCGAGTGTATCACTCATGGTTATGGCAGCACTGCATAAATCTCTTACTGTCTATCCGTAAGATGCT
TTCTGTGACTGGTGAGTACTCAACCAAGTCATTCTGAGAATAGTGTATGCGGCGACCGAGTTGCTCTTCCCGGCGTCAATACGGGATAATAC
CGCGCCATAGCAGAACTTTAAAAGTGTCTCATCATTGAAAAACGTTCTTCGGGGCGAAAACTCTCAAGGATCTTACCGCTGTTGAGATCCAGT
TCGATGTAAACCCACTCGTGCACCCAACTGATCTTCACTCTTTTACTTTACCAGCGTTTCTGGGTGAGCAAAAAAGGAAAGGCAAAATGCCG
CAAAAAAGGGAAATAAGGGCGACCGGAAATGTTGAATACTCATACTCTTCTTTTCAATATTATGAAGCATTATCAGGGTTATTTGTCTCAT
GAGCGGATACATATTTGAATGTATTTAGAAAAATAACAATAAGGGTTCCGCGCACATTTCCCGAAAAAGTGCCACCTGATGCGGTGTGAAAT
ACCGCACAGATGCGTAAGGAGAAAAATACCGCATCAGGAAATGTAAGCGTTAATATTTTGTAAAATTCGCGTTAAATTTTTGTTAAATCAGCT
CATTTTTTAACCAATAGGCCGAAATCGGCAAAATCCCTTATAAATCAAAAAGAAATAGACCGAGATAGGGTTGAGTGTGTTCCAGTTTGGAAACA
GAGTCCACTATTAAGAAGCTGGACTCCAACGTCAAAGGGCGAAAAACCGTCTATCAGGGCGATGGCCCACTACGTGAACCATCACCCATAATCA
AGTTTTTTGGGGTCGAGGTGCCGTAAAGCACTAAATCGGAACCTAAAGGGAGCCCCGATTTAGAGCTTGACGGGAAAGCCGGCGAACGTGG
CGAGAAAGGAAGGAAGAAAGCGAAAGGAGCGGGCGCTAGGGCGCTGGCAAGTGTAGCGGTCACGCTGCGCGTAACCCACA

```

**Supplementary Figure S9.** Plasmid pSN10K. The plasmid map with the main features highlighted is depicted in **A** and the FASTA formatted sequence in **B**. N10.3 – 3’ homologous region for site N10; N10.5 – 5’ homologous region for site N10; TT – double transcriptional terminators; Amp<sup>R</sup> – gene encoding the protein responsible for ampicillin resistance; Km<sup>R</sup> – gene encoding the protein responsible for neomycin/kanamycin resistance.

A

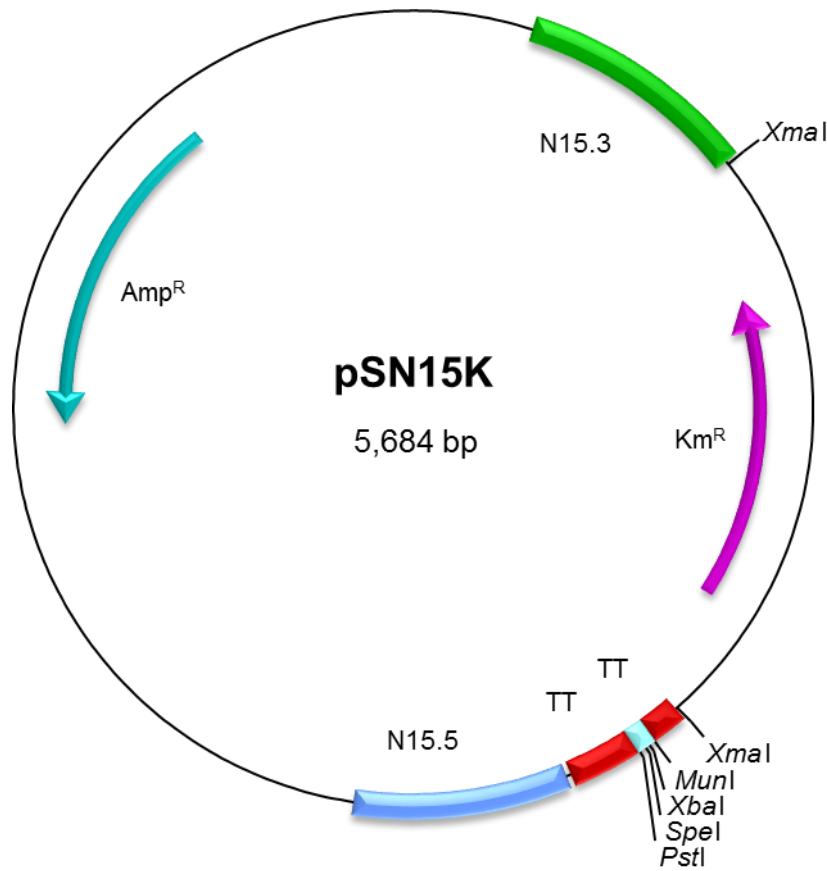

B

```
>pSN15K
CAGCCGCCGCGCTTAATGCGCCGTACAGGGCGCGTCCATTCCGCATTACAGGCTGCGCAACTGTTGGGAAGGGCGATCGGTGCGGGCCTCTTCG
CTATTACGCCAGCTGGCGAAAGGGGATGTGCTGCAAGGCGATTAAGTTGGGTAAACGCCAGGGTTTTCCAGTACGACGTTGTAAAACGACCG
CCAGTGAATTGTAAATACGACTCACTATAGGGCGAATTGGGCCCGACGTGCGATGCTCCCGGCCGCCATGGCGGCCCGGGAATTCGATTCTAAA
CTTACGGCATTGGCATCAACGGGAGCCACCGTCGGAGTAGGGGAAGTAACAACGGGGAACTGGTATTGGTGGGCAAAATTTTTACTAGCCATT
GATTCATGGGGCAGATTGAACGCTCCCAACCACAAAAGTCCCCCTAATACAACGACAGAATAAATAACAGGAAAAAAGGAATCCAAGGAGT
TACCCCTCTTTATGGGATGGAACCTTCAATCGACATTAAGGTGGGAGGGGGAGGAGGCAATGGGGACAATGGTGGTCCAGAAAAGGAAGGTGGC
TCCGACGTCAAGGCAACGGGACATCCACAGGATTACAGAAACGAACCTGGGGGCTAAGGCGGTTGCCACAATTAGTACAAAAAACGGGAGTAG
TCATAGGTGAAAACCCGACTATAGAATTAGAAAAATTTAACTTTTTATCCGAATTTTATTCGTCATGTTCCCAAATAACTATCAAAATAAT
TGGAAAAATTAATATTTGGTCTGTTGGTCACCGCTCCCTAAAGACCTGGCCATTGTAAGAGATTACACCCGGGCGATTACTTTTCGACCTC
ATCTATTAGACTCTCGTTTGGATTGCAACTGGTCTATTTTCCTCTTTTGTGTTGATAGAAAAATCAAAAAGGATTTGCAGACTACGGGCCTAAA
GAATAAAAAATCTATCTGTTTCTTTTCATTCTCTGATTTTTTATAGTTTCTGTTGTCATGGGCATAAAAGTTGCCTTTTTAATCACAAATTCAGA
AAATATCATAATATCTCATTTCACTAAATAATAGTGAACGGCAGGTATATGTGATGGGTTAAAAAGGATCGATCCCTTAGCGAACCCAGAGTC
CCGCTCAGAAGAACTCGTCAAGAAGGCGATAGAAGGCGATGCGCTGCGAATCGGGAGCGGCGATACCGTAAAGCACAGGGAAGCGGTCAGCCCA
TTCCGCGCAAGCTCTCAGCAATATCACGGGTAGCCAACGCTATGTCCTGATAGCGGTCGCCACACCCAGCCGGCCACAGTCGATGAATCCA
GAAAAGCGGCCATTTTCCACCATGATATTCGGCAAGCAGGCATCGCCATGGGTACGACAGAGATCTCGCCGTCGGGCATCCGCGCTTGAGCC
TGGCGAACAGTTCCGGCTGGCGGAGCCCTGATGCTCTTCGTCAGATCATCCTGATCGACAAGACCGGCTTCCATCCGAGTACGTGCTCGCTC
GATGCGATGTTTCGCTTGGTGGTGAATGGGCAGGTAGCCGGATCAAGCGTATGCAGCCGCCGATGTCATCAGCCATGATGGATACTTTCTCG
GCAGGAGCAAGGTGAGATGACAGGAGATCTGCCCGGCACTTCGCCAATAGCAGCCAGTCCCTTCCCGCTTCAGTGACAACGTCGAGCACAG
CTGCGCAAGGAACGCCCGCTCGTGGCCAGCCACGATAGCCGCGCTGCCTCGTCTTGGAGTTCATTACAGGGCACCGGACAGGTCGGTCTTGACAAA
AAGAACCAGGGCCCGCTGCGCTGACAGCCGAACAGCGCGCATCAGAGCAGCCGATTGTCTGTTGTGCCAGTCATAGCCGAATAGCCTCTCC
ACCAAGCGGCCCGGAGAACCTGCGTGCAATCCATCTTGTCAATCATGCGAAACGATCCCTCATCTGTCTCTTGATCAGATCTTGATCCCTGCG
GCCATCAGATCCTTGGCGGCAAGAAAGCCATCCAGTTTACTTTGACAGGGCTTCCCAACCTTACCAGAGGGCGCCCGAGTGGCAATTCGGGTTT
GCTTGCTTCCATAAAAACCGCCAGTCTAGCTATCGCCATGTAAGCCCACTGCAAGCTACCTGCTTTCTCTTTGCGCTTGCGTTTTCCCTTGTC
CAGATAGCCAGTAGCTGACATTCACCCGGGAAAAAAAACCCCGCCCTGACAGGGCGGGGTTTTTTTTTTCAGATAAAAAAATCCTTAGCTTT
CGTAAAGGATGATTTCTGCAATTTGGCGGCGCTTCTAGATGCACTAGTAGCGGCGCTGCGAGTCCGGCAAAAAACGGGCAAGGTGTCACCAC
CCTGCCCTTTTCTTTAAACCGAAAAGATTACTTCGCGTTGGAGAGCGTTCCACGACAAAACAACAGATAAAACGAAAAGGCCAGTCTTTTCGAC
TGAGCCTTTCGTTTTATTTGATGCTGGTACCGGGTGAATCCATTGGGCACGAGAGTTAGTAAGGCAGTGGCAATTAATAGAGGCTTATGGTT
GATTCGATGTTTTGCTCTGAAATTTTCGGCAATAACAATACTTCGCTCTTCTAGCCCTATTAACCATTTTAACGACAAAATGATGGGGCA
ACGATTAACAAAATGAATAAATTTATGTTTTCAAGATGAAAATTTGAAAATTTGATTTCTTATATTTCTACTATAGAAGACTAATACAA
TTAGATCTAAAATTTGCAAGTATAAAAAATCAGCAAAATAGTTATATTTGTTAATAATTTCAATGACCCAATAACTCGTACTGTTATCTACGTGGTGA
AAGCCAAAAAGACGAACAGTTTAGCCTCTCCTCCTCGGCGATCGCCAAGCGAAATGTCTATGGGAGATGTTTCAGATTGAGCATTTTTTTCTAAA
AGCCCTTGCTAAAACAACACATGTGCAGGGTGTCCCGGATGTTGACTAAATTCAGCGGCTCGACCATATGGGAGAGCTCCCAACCGGTTGGA
```

```
TGCATAGCTTGAGTATTCTATAGTGTACCTAAATAGCTTGGCGTAATCATGGTCATAGCTGTTTCTGTGTGAATTTGTTATCCGCTCACAAT
TCCACACAACATACGAGCCGGAAGCATAAAGTGTAAAGCCTGGGGTGCCTAATGAGTGTAGCTAACTCACATTAATTGCGTTCGCGTCACTGCC
GCTTCCAGTTCGGGAAACCTGTCTGTCCAGCTGCATTAATGAATCGGCCAACCGCGGGGAGAGGCGGTTTGCCTATTGGGCGCTCTCCGCTT
CCTCGCTCACTGACTCGTTCGCGTTCGGTTCGGCTGCGGCGAGCGGTATCAGTCACTCAAAGGCGGTAATACGGTTATCCACAGAATCAGG
GGATAACGCAGGAAAGAATGTGAGCAAAGGCCAGCAAAGGCCAGGAACCGTAAAAAGGCCGCGTTCGCTGGCGTTTTTCCATAGGCTCCGC
CCCCGTGACGAGCATCAAAAAATCGACGCTCAAGTCAAGAGTGGCGAAACCCGACAGGACTATAAAGATACCAGGCGTTTTCCCCCTGGAAGCT
CCCTCGTGGCTCTCCTGTCCGACCTGCGGCTTACCGGATACCTGTCCGCTTCTCCCTTCGGGAAGCGTGGCGCTTCTCATAGCTCACG
CTGTAGGTATCTCAGTTCGGTGTAGGTCTGTCCGCTCCAAGCTGGGCTGTGTGCACGAACCCCGCTTCAGCCGACCGCTGCGCTTATCCGGT
AATATCGTCTTGAGTCCAACCCGGTAAGACACGACTTATCGCCACTGGCAGCAGCCACTGGTAACAGGATTAGCAGAGCGAGGTATGTAGCGG
GTGCTACAGAGTCTTGAAGTGGTGGCCTAACTACGGCTACACTAGAAGAACAGTATTTGGTATCTGCGCTCTGCTGAAGCCAGTTACCTTCGG
AAAAGAGTTGGTAGCTCTTGATCGGGCAAACAACCACCGCTGGTAGCGGTGGTTTTTTTGTGTTGCAAGCAGCAGATTACGCGCAGAAAAAAA
GGATCTCAAGAAGATCCTTTGATCTTTTACGGGCTGTGACGCTCAGTGAACGAAAACTCACGTTAAGGGATTTTGGTCATGAGATTATCAA
AAAGGATCTTACCTAGATCCTTTTAAATTAATAATGAAGTTTTTAAATCAATCTAAAGTATATATGAGTAACTTGGTCTGACAGTTACCAATG
CTTAATCAGTGAGGCACCTATCTCAGCGATCTGTCTATTTTCGTTTATCCATAGTTGCCTGACTCCCCGTCGTGTAGATAACTACGATACGGGAG
GGCTTACCATCTGGCCAGTGCATGCAATGATACCGCGAGACCCAGCTCACCGGCTCCAGATTTATCAGCAATAAACCCAGCCAGCCGGAAGGG
CCGAGCGCAGAAAGTGGTCTGCAACTTTTACCGCTCCATCCAGTCTATTAATTTGTTGCCGGAAGCTAGAGTAAGTATGTTCCAGTTAATAG
TTTGGCAACGTTGTTGCCATTGCTACAGGCATCGTGGTGTACGCTCGTGGTTTGGTATGGCTTCATTCAGCTCCGGTTCCCAACGATCAAGG
CGAGTTACATGATCCCCCATGTTGTGCAAAAAAGCGGTTAGCTCCTTCGGTCCCGATCGTTGTCAGAAAGTAAAGTTGGCCGAGTGTATCAC
TCATGGTTATGGCAGCACTGCATAATCTCTTACTGTCTATCCGCTAAGATGCTTTTCTGTGACTGGTGGTACTCAACCAAGTCATTTCTG
AGAATAGTGTATGCGGGCAGCCGAGTTGCTCTTGGCCGGGCTCAATACGGGATAATACCGCGCCACATAGCAGAACTTAAAAGTGTCTATCATT
GGAAAACGTTCTTCGGGGGCAAACTCTCAAGGATCTTACCGCTGTTGAGATCCAGTTCGATGTAACCCACTCGTGCACCACTGATCTTCAG
CATCTTTTACTTTTACCAGCGTTTTCTGGGTGAGCAAAAACAGGAAGGCAAAATGCCGCAAAAAAGGGAAATAAGGGCGACACGGAAATGTTGAAT
ACTCATACTCTTCTTTTCAATATTTTGAAGCATTATCAGGGTTATGTCTCATGAGCGGATACATATTTGAATGTATTTAGAAAAATAAA
CAAAATAGGGGTTCCGCGCACATTTCCCGAAAAAGTGCCACCTGATGCGGTGTGAAATACCGCACAGATGCGTAAGGAGAAAAATACCGCATCAGG
AAATGTAAGCGTTAATATTTTGTAAAAATTCGCGTAAATTTTTGTTAAATCAGCTCATTTTTTAAACCAATAGGCCGAAATCGGCAAAATCCC
TTATAAATCAAAAGAATAGACCGAGATAGGGTTGAGTGTGTTCCAGTTTGAACAAGAGTCCACTATTAAGAAGCTGGACTCCAACGTCAAA
GGCGCAAAACCGTCTATCAGGGCGATGGCCACTACGTGAACCATCACCTAATCAAGTTTTTTGGGGTCGAGGTGCCGTAAGCACTAAATC
GGAACCTAAAGGGAGCCCCGATTTAGAGCTTGACGGGGAAAGCCGGCAACGTGGCGAGAAAGGAAGGAAGAAAGCGAAAGGAGCGGGCGC
TAGGGCGTGGCAAGTGTAGCGGTACGCTGCGGTAACCACCA
```

**Supplementary Figure S10.** Plasmid pSN15K. The plasmid map with the main features highlighted is depicted in **A** and the FASTA formatted sequence in **B**. N15.3 – 3' homologous region for site N15; N15.5 – 5' homologous region for site N15; TT – double transcriptional terminators; Amp<sup>R</sup> – gene encoding the protein responsible for ampicillin resistance; Km<sup>R</sup> – gene encoding the protein responsible for neomycin/kanamycin resistance.

**A**

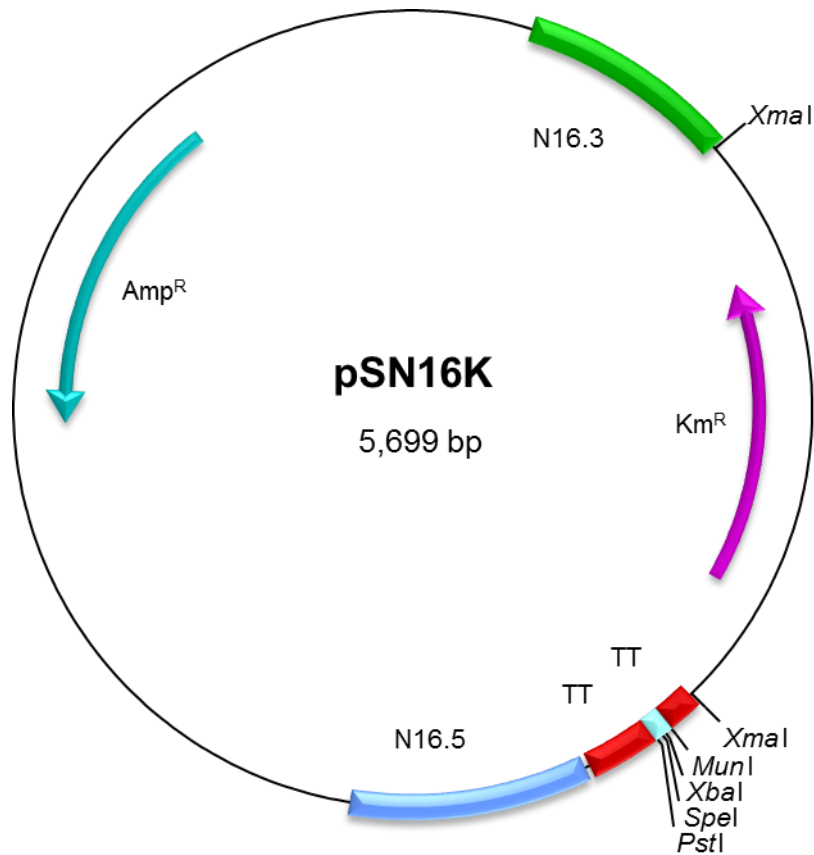

**B**

>pSN16K  
CACCCGCCGCGCTTAATGCGCCGTACAGGGCCGCTCCATTCCGCATTACAGGCTGCGCAACTGTTGGGAAGGGCGATCGGTGCGGGCCTCTTCG  
CTATTACGCCAGCTGGCGAAAGGGGATGTGCTGCAAGGCGATTAAGTTGGGTAACGCCAGGGTTTTCCAGTCACGACGTTGTAACACGACGG  
CCAGTGAATTGTAATACGACTCACTATAGGGCGAATTGGGCCCGACGTCGCATGCTCCCGGCCGCCATGGCGGCCGCGGGAATTCGATTGTGAG  
CTTGATGGTGATGGTGGGTAAAGCTTCATTGTCCATGCGCCGAGCTTGACGGTAAAAATCCGTGTCTGGGGCCAATCATTGGGAACGCTCACA  
CAGATACCGTTGCGAGTTAAGTCAAGGATACCCCAACCAATCCCTTCCATATCGAACACTGGCAAAAGGCCAACATCCGCTCTCCTGCC  
GTCGCTCCTGCACCCCTGGAGATGGGCAATGGTTAGGGCTTCTTGGGAGAGGGAAGATGGAGAATCTTGAGCCATGGAGATTATTTCTCGGT  
TAAATTAGTTTTACTAGTAAATGGGCCAGGTTGACCATATTGTAGTCATTCACCTGGGTCGATCTCTCCATCAGGGTCATTTGGTTAATT  
GTTGATGAGAAATGGGAAGGAGTAATCCATAGATATTTGCCAGTTAACTCGATTTGAGCAGAATGGGAAGGACGATTTGGAACTTTGGTTG  
ACAGGGCAACAAAGCCAGCAGATTACACCCGGGCGATTTACTTTTCGACCTCATCTATTAGACTCTCGTTGGATTGCAACTGGTCTATTTTC  
CTCTTTTGTGATAGAAAATCATAAAAGGATTTGCAGACTACGGGCTAAAGAATAAAAAATCTATCTGTTTCTTTTCATTCTCTGTATTTT  
TTATAGTTTCTGTGTCATGGGCATAAAGTTGCCTTTTTAATCACAAATTCAGAAAATATCATAAATCTCATTTCACTAAATAATAGTGAACGGC  
AGGTATATGTGATGGGTTAAAAAGGATCGATCTCTAGCGAACCCAGAGTCCCGCTCAGAAGAACTCGTCAAGAAGGCGATAGAAGGCGATGC  
GCTGCGAATCGGGAGCGGCATACCGTAAAGCACGAGGAAGCGGTACAGCCATTGCGCCGCAAGCTCTTCAGCAATATCACGGGTAGCCAACGC  
TATGTCTGATAGCGGTCGCCACACCCAGCCGGCCACAGTCGATGAATCCAGAAAAGCGGCCATTTCCACCATGATATTCGGCAAGCAGGCA  
TCGCCATGGGTCACGACGAGATCCTCGCCGTGCGGCATCCGCGCCTTGAGCCTGGCGAACAGTTCCGGCTGGCGCAGCCCTGATGCTCTTCGT  
CCAGATCATCCTGATCGACAAGACCGGCTTCCATCCGAGTACGTGCTCGCTCGATGCGATGTTTCGCTTGGTGGTCAATGGGCAGGTAGCCGG  
ATCAAGCGTATGCAAGCCGCGCATGTCATCAGCCATGATGGATACTTTCTCGGCAGGAGCAAGGTGAGATGACAGGAGATCCTGCCCGGCACT  
TCGCCAATAGCAGCCAGTCCCTTCCCGCTTCACTGACACAGTCGAGCACAGCTGCGCAAGGAACGCCCGCTGCTGGCCAGCCACGATAGCCGG  
CTGCTCCTGTTGGAGTTCAATTCAGGGCACCGGACAGGTCGGTCTTGACAAAAAGAACCGGGCGCCCTGCGCTGACAGCCGGAACACGGCGGC  
ATCAGAGCAGCCGATTGCTGTTGTGCCCAGTCATAGCCGAATAGCCTCTCCACCAAGCGGGCCGAGAACCTGCGTGCAATCCATCTTGTTC  
ATCATGGCAACGATCCTCATCCTGTCTTTGATCAGATCTTGATCCCTGCGCCATCAGATCCTTGGCGGCAAGAAAGCCATCCAGTTTACTT  
TGAGGGCTTCCCAACCTTACCAGAGGGCGCCAGCTGGCAATCCGGTTTCGCTTGGCTGTCATAAAACCGCCAGTCTAGCTATCGCCATGT  
AAGCCACTGCAAGCTACCTGCTTCTCTTTGCGCTTGGGTTTTCCCTTGTCCAGATAGCCAGTACGATTCACCCGGGAAAAAAAACC  
CCGCCCTGACAGGGCGGGTTTTTTTTTCAGATAAAAAAATCCTTAGCTTTCGTAAGGATGATTTCTGCAATTTGGCGGCGCTTCTAGAATG  
CACTAGTAGCGGCGCTGCACTCCGGCAAAAAACCGGGCAAGGTGTCAACCCCTGCCCCTTTTCTTTTAAACCGAAAGATTAATTCGCGTTG  
GAGAGCGTTCACCGACAACAACAGATAAAACGAAAGGCCAGTCTTTCGACTGAGCCTTTCGTTTTATTGATGCTGGTACCGGGTGTAAATC  
GCTGGAGGCGAATCGGTTGAGAACCATAAAATCTTGGGGAACAGGGGAATGTTAATGAACACATGACATGATAGGATAGCGAATGATTTAAA  
GCAATGATTTCCCTGAGATAAAATATATTTGACCCACTGCTCCGCTTAATTTTGGCGCTAATCTGGGCAAAAATTCGTTGGTTTTCCGAAAGG  
TGAACCGTAGCTAGCTTGTATTGCCCCAACCTAACTCATCATTGCTCCATGGCGGCCAAAAATCTTTAGGACAAAACCTCCGAGGTCGAGG  
CTTGATTTTTTCAGAGGAAAAATTCCTCGGCTAAATAATCAAAAAGTTGAAAAAAAAGTTTTTCAGCTAAGGTTTGTATGTTATATTTTATCT  
TATGTAGACTTTTAAAAAACAAGTCCCGCAATCAAGCATCATTCAAGGAAAAAATATCCTATGCCAACGCTCCACCGCACTAACCGG  
CAAAGCATTACTCAATAAAGTTAAAGAACTATCCCATCTGCCCGTCGAGAAACGGCAAAAGCCTGTGGTTACTACTCGACCATATGGGAGAGC

TCCCAACGCGTTGGATGCATAGCTTGAGTATTCATAGTGTACCTAAATAGCTTGGCGTAATCATGGTCATAGCTGTTTCTGTGTGAAATTG  
TTATCCGCTCACAAATCCACACAACATACGAGCCGGAAGCATAAAGTGTAAAGCCTGGGGTGCCTAATGAGTGAGCTAACTCACATTAATTGCG  
TTGCGCTCACTGCCCCGCTTCCAGTCGGGAAACCTGTCTGTCCAGCTGCATTAATGAATCGGCCAACGCGCGGGGAGAGGCGGTTTGCCTATTG  
GGCGCTCTTCCGCTTCTCGCTCACTGACTCGCTCGCTCGGTCTCGCTGCGCGGAGCGGTATCAGCTCACTCAAAGGCGGTAATACGGTT  
ATCCACAGAAATCAGGGGATAACGCAGGAAAGAACATGTGAGCAAAGGCCAGCAAAGGCCAGGAACCGTAAAAAGGCCGCTTGTGGCGTTT  
TTCCATAGGCTCCGCCCCCTGACGAGCATCACAAAAATCGACGCTCAAGTCAGAGGTGGCGAAACCCGACAGGACTATAAAGATACCAGGCGT  
TTCCCCCTGGAAGCTCCCTCGTGCCTCTCTGTTCGACCTGCGCTTACCGGATACCTGTCCGCTTCTCCCTTCGGGAAGCGTGGCGCT  
TTCTCATAGCTCACGCTGTAGGTATCTCAGTTCGGTGTAGGTCTGCTCCAAAGCTGGGCTGTGTGCACGAACCCCGCTTACGCCGACCGC  
TGGCCTTATCCGTAACATCGCTTGTAGTCCAACCCGTAAGACACGACTTATCGCCACTGGCAGCAGCCACTGGTAACAGGATTAGCAGAG  
CGAGGTATGTAGGCGGTGTACAGAGTCTTGAAGTGGTGGCTAACTACGGCTACACTAGAAGAACAGTATTTGGTATCTGCGCTCTGTGAA  
GCCAGTTACCTTCGGAAAAAGAGTGTGTAGCTCTTGATCCGGCAACAAACCACGCTGGTAGCGGTGGTTTTTTTGGTTTGAAGCAGCAGATT  
ACGCGCAGAAAAAAGGATCTCAAGAAGATCCTTTGATCTTTTACGGGCTGACGCTCAGTGAACGAAAACTCACGTTAAGGGATTTTGG  
TCATGAGATTATCAAAAAGGATCTTCACCTAGATCCTTTTAAATTAATAATGAAGTTTTTAAATCAATCTAAAGTATATATAGTAAACTTGGTC  
TGACAGTTACCAATGCTTAATCAGTGAGGCACCTATCTCAGCGATCTGTCTATTTTCGTTTCCATCCATAGTTGCCTGACTCCCGCTCGTGTAGATA  
ACTACGATACGGGAGGGCTTACCATCTGGCCCCAGTGTCTGCAATGATACCGCGAGACCCACGCTCACGGCTCCAGATTTATCAGCAATAAAC  
AGCCAGCCGGAAGGGCCGAGCGAGAAGTGGTCTGCAACTTTTCCGCTCCATCCAGTCTATTAATTGTTGCCGGGAAGCTAGAGTAAGTAG  
TTGCCAGTTAATAGTTTGGCAACGTTTGGCATTGTACAGGCATCGTGGTGTACGCTCGTCTGGTATGGCTTATTACGCTCGGGT  
TCCCAACGATCAAGGCGAGTTACATGATCCCCATGTTGTGCAAAAAAGCGGTTAGCTCCTTCGGTCTCCGATCGTGTGAGAAAGTAAAGTGG  
CCGAGTGTATCACTCATGGTTATGGCAGCACTGCATAATCTCTTACTGTCTATGCCATCCGTAAGATGCTTTTCTGTGACTGGTGAGTACTC  
AACCAAGTCATTTGAGAAATAGTGTATGCGGCGACCCGAGTTGCTCTTGCCCGGCGTCAATACGGGATAAATACCCGCGCCACATAGCAGAACTTTA  
AAAGTCTCATCATTTGAAAACGTTCTTCCGGGCGAAAACTCTCAAGGATCTTACCGCTGTTGAGATCCAGTTCGATGTAACCCACTCGTGCAC  
CCAAGTATCTTACGATCTTTTACTTTTACCAGCGTTTCTGGGTGAGCAAAAACAGGAAGGCAAAATGCCGCAAAAAAGGGAATAAGGGCGAC  
ACGGAAATGTTGAATACTCATACTCTTCTTTTCAATATTTAAGCATTATCAGGGTATTTGTCTCATGAGCGGATACATATTTGAATGT  
ATTTAGAAAAATAAACAATAGGGGTTCCGCGCACATTTCCCGAAAAAGTGCCACCTGATGCGGTTGAAATACCGCACAGATGCGTAAGGAGA  
AAATACCGCATCAGGAAATGTAAGCGTTAATATTTTGTAAAAATTCGCGTTAAATTTTGTAAATCAGCTCATTTTTTAAACCAATAGGCCGA  
AATCGGCAAAATCCCTTATAAATCAAAAGAATAGACCGAGATAGGGTTGAGTGTGTTCCAGTTTGAACAAGAGTCCACTATTAAGAAGCGTG  
GACTCCAACGTCAAAGGGCGAAAAACCGTCTATCAGGGCGATGGCCACTACGTGAACCATCACCTAATCAAGTTTTTTGGGGTCGAGGTGCC  
GTAAAGCACTAAATCGGAACCTAAAGGGAGCCCCGATTTAGAGCTTGACGGGGAAAGCCGGCAACGTTGGCGAGAAAGGAAGGAAGAAAGC  
GAAAGGAGCGGGCTAGGGCGTGGCAAGTGTAGCGGTACGCTGCGCTAACACCA

**Supplementary Figure S11.** Plasmid pSN16K. The plasmid map with the main features highlighted is depicted in **A** and the FASTA formatted sequence in **B**. N16.3 – 3' homologous region for site N16; N16.5 – 5' homologous region for site N16; TT – double transcriptional terminators; Amp<sup>R</sup> – gene encoding the protein responsible for ampicillin resistance; Km<sup>R</sup> – gene encoding the protein responsible for neomycin/kanamycin resistance.

**A**

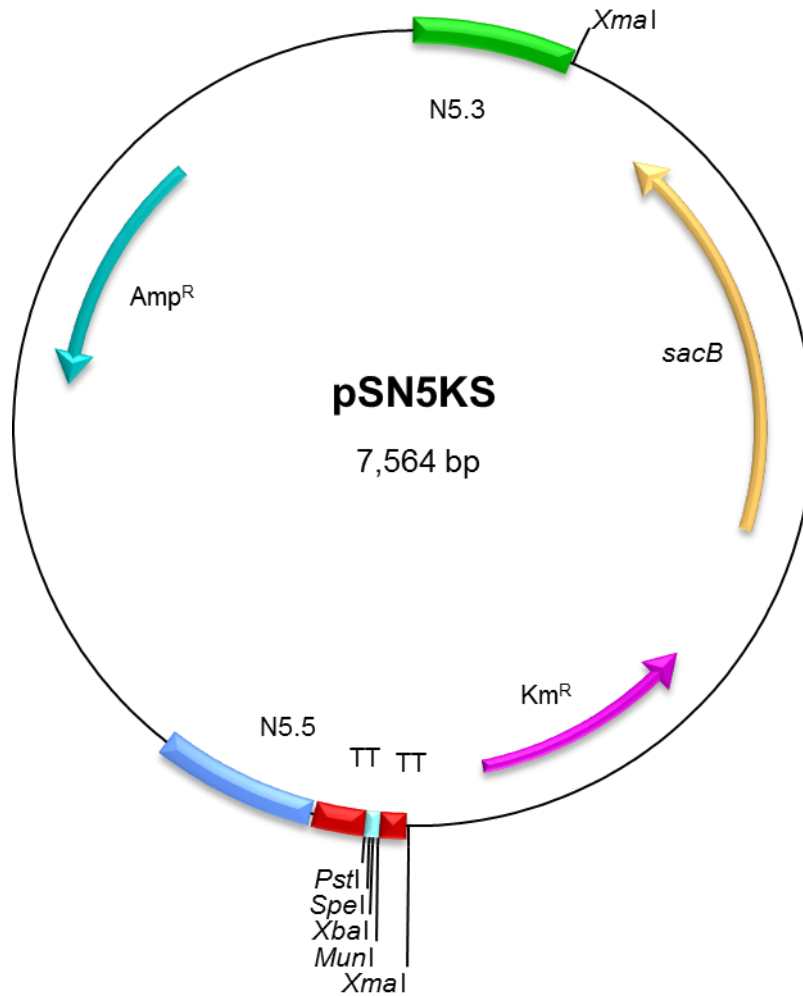

**B**

```

>pSN5KS
TGTCCAAATCAGCATTGCTCTGCCAGGTGAGACGGAGTTTTTGTCCCACTAATCCCTGTTGGATAGAAGGCGCTTGATACAGTTCCAACCAAAAC
CCAATCTCCTGTCTGGCTTTAGTTTCTTCCACCGTCGGCAGGATTAACGACCCAACCACTCTCCCAAAGGCCGATAATACGCCTCATCTAAA
TTCTGTTGCAGAGGATAATAATCTACCTGGTTGGCGGGCAACTGACTGCTAATTTGATAATCCGGGATGCGGCCAGAGGTTTCTGAGGTTGAA
ACAGCGTAGCTAGGGAATCACCACGAGCGGGCATCGCCACCAATACCATCCGCCAGCGCCATTGCTTTCATCTGTGGACTGCCCTAAAAATT
GCCATAAAAAACACCTGGGGCGTCTTTTCTTGTTCGACTCCAGATGTTTTTTCTAATTTCCCTCACACCTGTCCCTAAGTATAAATCACCACGG
GGATTGTCAAGGCTTCAGGATTACACCCGGCAAGCGGATGGCTGATGAAACCAAGCCAACCAGGAAGGGCAGCCACCTATCAAGGTGTACTG
CCTTCCAGACGAACGAAGAGCGATTGAGGAAAAGCGGGCGGGCCGGCATGAGCCTGTGCGCCTACCTGCTGGCCGTGCGCCAGGGCTACAAA
ATCAGGGCGTCGTGGACTATGAGCAGTCCCGGAGGGCGTCCCGGAAAACGATTCCGAAGCCCAACCTTTCATAGAAGGCGGGCGTGGAAATCG
AAATCTCGTGATGGCAGGTGGGGCGTCCGCTGGTCCGGTCATTTCCGCTCCGTACCATCGGCATTTTCTTTTGGCGTTTTTATTTGTTAACTGTTAA
TTGTCCTTGTTC AAGGATGCTGTCTTTGACAACAGATGTTTTCTTGCCTTTGATGTTTCAGCAGGAAGCTCGGCCGCAAACGTTGATTGTTTGTCT
GCGTAGAATCCTCTGTTTGTCAATAGCTTGAATCAGCACATTTTCTTTCGCTTGAGGTACAGCGAAGTGTGAGTAAGTAAAGGTTTACAT
CGTTAGGATCAAGATCCATTTTAAACAAGGCCAGTTTTTGTTCAGCGGCTTGATGGGCCAGTTAAAGAATTAGAAACATAACCAAGCATGTA
AATATCGTTAGACGTAATCCCGTCAATCGTCATTTTGTATCCCGGGGAGTCAGTGAACAGGTACCATTTGCGCTTATTAAAGAGCGTTCGCG
CGTTCAATTTTCATCTGTTACTGTGTTAGATGCAATCAGCGGTTTTCATCACTTTTTTTCAGTGTGTAATCATCGTTTGTAGCTCAATCATAACCGAGAG
CGCGGTTTGTCTAAGTCAAGCGTGCCTTTTTTATCGCTTTGCGAGAGTTTTTGTACTTCTTTCAGCGGAAGAAATGATGTGCTTTTGCATAGTATGC
TTTGTAAATAAAGATTTCTGCGCTTGGTAGCCATCTTCAGTTCAGTGTGTTGCTTCAAATACTAAGTATTTGTGGCCTTTATCTTCTACGTAG
TGAGGATCTCTCAGCGTATGGTTGTGCGCTGAGCTGATGTTGCCCTCATCGATGAACAGTGTGTTGATACATTTTGTGATACGTTTTTCCGTCACCGTCAA
AGATTGATTTATAATCCTCTACACCGTTGATGTTCAAAGAGCTGTCTGATGCTGATACGTTAACTTGTGCAGTTGTCAGTGTGTTGTTGCGGTA
ATGTTTACCGGAGAAATCAGTGTAGAATAAACGGATTTTTCCGTCAGATGTAATGTGGCTGAACCTGACCATTCTGTGTTTGGTCTTTTAGG
ATAGAATCATTGTCATCGAATTTGTGCTGTCTTTAAAGACGCGGCCAGCGTTTTTCCAGCTGTCAATAGAAGTTTCGCCGACTTTTTGATAGA
ACATGTAATCGATGTGTATCCGCATTTTTAGGATCTCCGGCTAATGCAAAGACGATGGTAGCCGTGATAGTTTCCGACAGTCCCGTCAGC
GTTTTGTAATGGCCAGCTGTCCCAAACGTCAGGCCTTTTGCAGAAGAGATATTTTAAATGTGGACGAATCAAATTCAGAACTTGATATTTT
TCATTTTTTGTCTGTTACAGGATTTGCAGCATATCATGGCGTGTAAATATGGGAAATGCCGTATGTTTCTTATATGGCTTTTGGTTCGTTTCTT
TCGCAAACGCTTGAGTTGCGCCTCTGCCAGCAGTGGCGTAGTAAAGGTTAATACTGTTGCTTGTGTTTGCAACTTTTTGATGTTTCATCGTTCA
TGTCCTTTTTTATGTAAGTGTGTTAGCGGTCTGCTTCTCCAGCCCTGTTTGAAGATGGCAAGTTAGTTACGCACATAAAAAAAGACCT
AAAAATATGTAAGGGGTGACGCCAAAGTATACACTTTGCCCTTTACACATTTTAGTCTTGCCTGCTTTATCAGTAACAAACCCGCGCATTTAC
  
```

TTTTTCGACCTCATCTATTAGACTCTCGTTGGATTGCAACTGGTCTATTTTCTCTTTTTGTTTGTATAGAAAATCATAAAAGGATTTGCAGACT  
ACGGGCCATAAAGAACTAAAAATCTATCTGTTTCTTTTTCATTCTCTGTATTTTTTATAGTTTCTGTTGCATGGGCATAAAGTTGCCTTTTTTAAT  
CACAAATTCAGAAAATATCATATAATCTCATTTTCACTAAATAATAGTGAACGGCAGGTATATGTGATGGGTTAAAAAGGATCGATCCTCTAGCGA  
ACCCAGAGTCCCCTCAGAAAGACTCGTCAAGAAGCGGATAGAAGGCGATGCGTGCGAATCGGGAGCGCGATACCGTAAAGCACGAGGAAG  
CGGTCAGCCCATTCGCGCCCAAGCTCTTTCAGCAATATCAGGGGTAGCCACGCTATGTCTGTATAGCGGTCCGCCACACCCAGCCGGCCACAGT  
CGATGAATCCAGAAAAGCGGCCATTTTCCACCATGATATTCGGCAAGCAGGCATCGCCATGGGTACGACGAGATCTCGCCGTCGGGCATCCG  
CGCCTTGAGCCTGGCAACAGTTTCGGCTGGCGGAGCCCTGATGCTCTTCGTCCAGATCATCCTGATCGCAAGACCCGGCTCCATCCGAGTA  
CGTGCTCGCTCGATGCGATGTTTCGCTTGGTGGTCAATGGGCAGGTAGCCGGATCAAGCGTATGCAGCCGCCGATTCGATCAGCCATGATGG  
ATACTTTCTCGGCAGGAGCAAGGTGAGATGACAGGAGATCCTGCCCGGCACTTCGCCCAATAGCAGCCAGTCCCTTCCCGTTCAGTGACAAC  
GTCGAGCACAGTGCAGAAAGACGCCCGTCTGGCCAGCCAGATAGCCGCGTGCCTCGTCTTGGAGTTCATTTCAGGGCACCGGACAGGTTCG  
GTCTTGACAAAAAGAACCGGGCGCCCTGGCTGACAGCCGGAACACGGCGGCATCAGAGCAGCCGATTGTGTGTTGTCGCGAGTATAGCCGA  
ATAGCCTCTCCACCAAGCGCCGAGAACCTGGTGCATCCATCTTGTTCATCATGCGAAACGATCCTCATCTGTCTTGTATCAGATCT  
TGATCCCTTCGCGCATCAGATCCTTGGCGCAAGAAAGCCATCCAGTTTACTTTGAGGGTTCCTCAACCTTACCAGAGGGCGCCCGAGCTGGC  
AATTCGGTTCGCTTGTCTCCATAAAACCGCCAGTCTAGCTATCGCCATGTAAGCCCACTGCAAGTACCTGCTTTCTCTTTGCGCTTGGCT  
TTTTTTCAGATAAAAAA  
TCCTTAGCTTTTCGATAAGGATGATTTCTGCAATTTGGCGCGCTTCTAGAAATGCACTAGTAGCGCGCTCAGTCCGCGCAAAAAACGGGCAA  
GGTTCACCACTTCGCTTTTTTCTTAAACCGAAAAGATTACTTCGCGTTGGAGAGCTTACCGACAACAACAGATAAAACGAAAGGCC  
AGTCTTTTCGACTGAGCCTTTCGTTTTATTTGATGCTTGTACCGGTGTAATCGGTTGATTTTTCAGTGGCCCGCCGATGGATAAATACCAT  
GGCCGACCGACCGGATTTCCAGACAGTTTGAACAGTATTAATAGCTTTCCGACAGGCTCTGTGAAAATCTTAAAAAGTATTAAG  
ATTTTAAAAAGTATCTTATTTTCGAGGAAATGTTTTACTCGACTTGGCCAGCAACCGCGATTTTCGTGAAGGATTTGATCATGAGCTTGG  
GGCTTTGGCCACTGTGCTCGAAAATCGGGCTACATTGCTTCTTGTACACTGTGGCGACCACTCAACAGCGCTCCTTCATGTTGAGCTTG  
GGGAAAATCATCTGATCCGCTTTTTTGGTATCGGACTACGGCATCACCTGGACAGAAATCGGGATGACCGAGAATTAATGAAATTAGAAGGAG  
CCGAGGCGATCGCCAGTTGGAAGAATGGCCAATGTGGTCAAATATTGCCTAGCAGATGCCCCACTCGACCATATGGGAGACTCCCAACGC  
GTTGGATGCATAGCTTGTGATTTCCATAGTGTCACTAAATAGCTTGGCCATATCATGGTCATAGCTGTTTCCATGTTGAAATTTGATCCGCT  
CACAAATCCACACAACATACGAGCCGGAAGCATAAAGTGTAAAGCCTGGGGTGCCTAATGAGTGAGCTAACTCACATTAATGCGTTGCGCTCA  
CTGCCCGCTTTCCAGTCCGGAAACCTGTGCTGCCAGCTGCATTAATGAATCGGCCAACCGCGGGGAGAGCGGTTTGCATTTGGCGCTCT  
CCGCTTCTCGCTCACTGACTCGCTGCGCTCGTTCGCTGCGGCTGCGGCGAGCCGATCAGCTCACTCAAAGCGGTAATACGGTTATCCACAGA  
ATCAGGGATAAACCGAGAAAGACATGTGAGCAAAAAGCCGCAAAAAGCCGTAATAAAGCCGCTTAAAGCCGCTTTCGCTGGCTTTTTCCATAGG  
CTCCGCCCTTGCAGGATCACAAAAATCGACGCTCAAGTCAAGGTGGCGAAACCCGACAGGACTATAAAGATACCAGGCGTTTTCCCTG  
GAAGCTCCCTCGTCCGCTCTCTGTTCCGACCTTCCCGTACCAGGATACCTGTCCGCTTTCTCCCTTCGGGAAGCGTGGCGCTTTCTCATAG  
CTCACGCTGTAGGTATCTCAGTTCCGGTGTAGGTGCTTCCGCTCAAGCTGGGCTGTGTGCACGAACCCCGCTTACGCCGACCGCTGCGCTTA  
TCCGGTAACTAGCTTGTGATTTCCATAGTGTACCAAGGATGATGAGTAAAGGATGAGTAAACAGGACTGAGTAAACAGGATTTGACATGATG  
TAGGCGGTGCTACAGAGTTCTTGAAGTGGTGGCTAACTACGGCTACACTAGAAGACAGTATTTGGTATCTGCGCTCTGCTGAAGCCAGTTAC  
CTTCGGAAAAAGAGTTGGTAGCTCTTATCCGGCAAAACAAACCCGCTGTTGAGCGGTGTTTTTTTTGTTTGCAGCAGCAGATTACGCGCAGA  
AAAAAGGATCTCAAGAAGATCTTTGATCTTTTCTACGGGTCTGACGCTCAGTGAACGAAAACCTCACGTTAAGGATTTTGGTTCATGAGAT  
TATCAAAAAGGATCTTACCTAGATCTTTTAAATTAATAATGAAGTTTTTAAATCAATCAAAGTATATATGAGTAAACTGGTCTGACATGTA  
CCAATGCTTAATCAGTGAGGCACCTATCTCAGCGATCTGTCTATTTCTGTTTCCATAGTTGCCTGACTCCCGCTCGTGTAGATAACTACGATA  
CGGAGGGCTTACCATCTGGCCCGAGTGTGCAATGATACCGGAGACCCACGCTCACCGGCTCCAGATTTATCAGCAATAAACAGCCGACCGC  
GAAGGCGCAGCAGAGTGGTCTGCAACTTTATCCGCTCCATCCAGTCTATTAATTTGTTGCGGGAAGCTAGAGTAAGTAGTTCCGCGAT  
TAATAGTTTTCGCAACGTTGTGCTTGCATTTAGGATCTGTTGCTGCTGCTGTTGTTGATGGCTTCATTGAGTCCAGCTTCCCAACGA  
TCAAGGCGAGTTACATGATCCCATGTTGTGCAAAAAGCGGTTAGCTCCTTCGGTCCCTCCGATCGTTGTCAGAAGTAAGTTGGCCGAGTGT  
TATCACTCATGGTTATGGCAGACTGCATAATCTCTTACTGTATGCCATCCGTAAGATGCTTTTCTGTGACTGGTGAAGTACTCAACCAAGTC  
ATCTGAGAATAGTGTATCGGGCAGCAGTGTCTTTCGCGGCGTCAATACGGGATAATACCGCGCCACATAGCAGAACTTAAAAAGTGTCT  
ATCATTTGAAAACGTTCTTCGGGGCGAAAACCTCAAGGATCTTACCCTGTTGAGATCCAGTTTCGATGTAACCCACTCGTGCACCCCACTGAT  
CTTCAGCATCTTTTACTTTTACCAGCGTTTCTGGGTGAGCAAAAACAGGAAGGCAAAATGCCGCAAAAAGGGAAATAAGGGCGACACGGAATG  
TTGAATACATACCTCTTCTTTTCAATATATTTGAAGCATTATCAGGGTTATGTCTCATGAGCGGATACATATTTGAATGTATTTAGAAA  
AATAAACAAATAGGGGTTCCGCGCACATTTCCCGAAAAGTGCCACCTGATGCGGTGTAATAACCGCACAGATGCGTAAGGAGAAAATACCGC  
ATCAGAAAATTTGAAGCGTAAATTTTTGTTAAAATTCGCGTAAATTTTTGTTAAAATCAGCTCATTTTTTAAACCAATAGCCGAAATCGGCAA  
AATCCCTTATAAATCAAAAGAATAGACCGAGATAGGGTTGAGTGTGTTCCAGTTTGGAAACAAGAGTCCACTATTTAAAGAACGTGGACTCCAAC  
GTCAAAAGGGCGAAAACCGTCTATCAGGGCGATGGCCACTACGTGAACCATCACCTAATCAAGTTTTTTGGGGTCGAGGTGCCGTAAGCAC  
TAAATCGGAACCTTAAAGGGAGCCCGGATTTAGAGCTTACGGGGAAAGCCGGCGAACGTGGCGAGAAAGGAAGGAAGAAAGCGAAAGGAGC  
GGCGCTAGGGCGTGGCAAGTGTAGCGGTACGCTGCGGTAACCACACACCCCGCGCTTAAATGCGCCGCTACAGGGCGCGTCCATTCGC  
CATTCAGGCTGCGCAACTGTTGGGAAGGGCGATCGGTGCGGGCTCTTCGCTATTACGCCAGCTGGCGAAAGGGGATGTGCTGCAAGGCGATT  
AAGTTGGTAAACGCCAGGTTTTCCAGTACGACGTTGTAACGACGCGCCAGTGAATTTGTAATACGACTCACTATAGGGCGAATTTGGCCCG  
ACGTGCGATGCTCCCGCCGCCATGGCGGCCGCGGAAATTCGAT

**Supplementary Figure S12.** Plasmid pSN5KS. The plasmid map with the main features highlighted is depicted in **A** and the FASTA formatted sequence in **B**. N5.3 – 3' homologous region for site N5; N5.5 – 5' homologous region for site N5; TT – double transcriptional terminators; Amp<sup>R</sup> – gene encoding the protein responsible for ampicillin resistance; Km<sup>R</sup> – gene encoding the protein responsible for neomycin/kanamycin resistance; *sacB* – gene encoding the protein responsible for sucrose sensitivity.



A

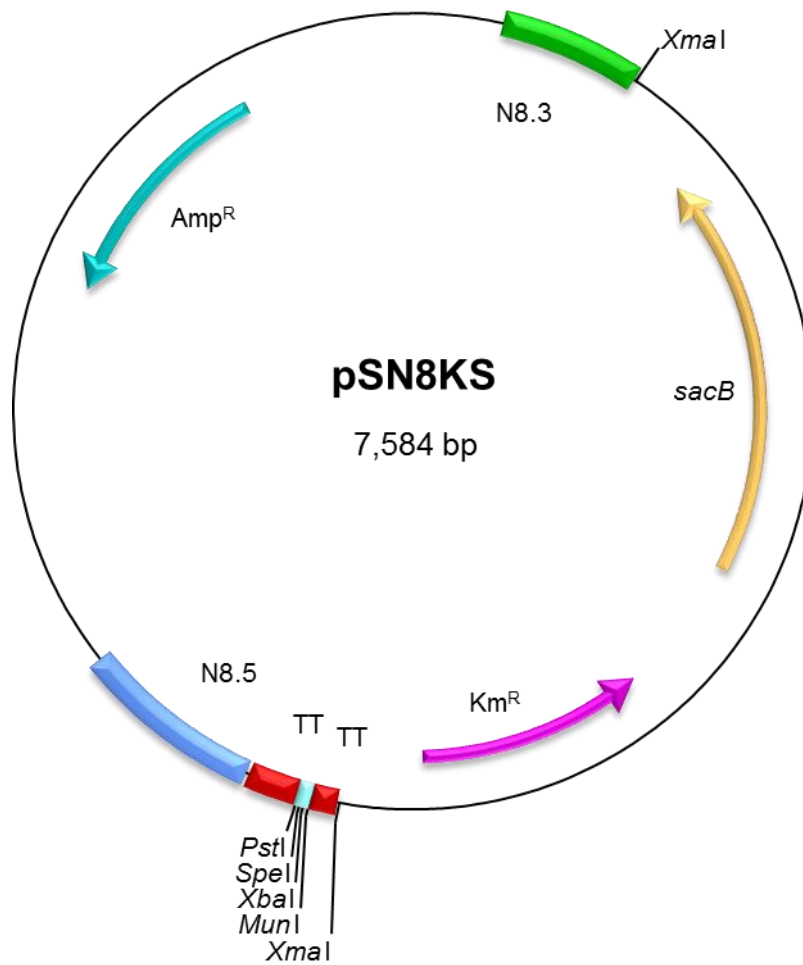

B

```
>pSN8KS
CACCCGCCGCGCTTAATGCGCCGTACAGGGCGCGTCCATTCCGCATTACAGGCTGCGCAACTGTTGGGAAGGGCGATCGGTGCGGGCCTCTTCG
CTATTACGCCAGCTGGCGAAAGGGGGATGTGCTGCAAGGCATTAAGTTGGGTAACGCCAGGGTTTTCCAGTACAGACGTTGTAACACGACGG
CCAGTGAATTGTAATACGACTCACTATAGGGCGAATTGGGCCCGACGTCCGATGCTCCCGGCCGCCATGGCGGGCCGGGAATTCGATTGATGA
CCGCTGGCGGAGTTTAGTCCAGGGTTATTTGTACCGTCAAGGTTACATTTGCCACCCAGATTTAACTACGCTGCGAGTCCGTACCATTTGGCGAT
CGGCCTATCTCACCATTAAGGGTAAAAATGCCAGCATTGCCCGCTTGGATTTGAGTATGAAATTTCTGCAAGTGGAGCCAAATTAATTTTGAC
AGAACTCTGTTCCAGCCCTGATTGAAAAATACGTTATTTGCCTCGATTACCATGGTAAAAACCTGAGAAGTAGACGAGTTTTTGGGGGATAACC
AGGTCTAATTTTAGCGGAAGTGAATTAACCTACACTGGTGAAAAAATAAGTCTACTTCCCTGGATCGGGGAAGAGGTAACGGATGATGCCCC
CTATTACAACGTCATTTAGCCCAACATCCCTACAAAAATTTGGTACAAGATTACACCCGGGCAAGCGGATGGCTGATGAAACCAAGCCAACCA
GGAAGGGCAGCCACCTATCAAGGTGTACTGCCTTCCAGACGAACGAAGAGCGATTGAGGAAAAGCGGCGGCGGCGGCGGATGAGCTGTGCGC
CTACCTGCTGGCCGTCGGCCAGGGCTACAAAAATCACGGGCGTCTGGACTATGAGCACGTCGCGGAGGGCGTCCCGGAAAACGATTCCGAAGCC
CAACCTTTCATAGAAGGCGCGGTGGAATCGAAATCTCGTGATGGCAGGTTGGGGCTCGCTTGGTCGGTCATTTCCGCTCGGTACCATCGGCATT
TTCTTTTGGCTTTTTATTTGTTAACTGTTAATTTGCCTTGTTCAGGATGCTGTCTTTGACAACAGATGTTTTCTGCCTTTGATGTTACAGCAG
GAAGCTCGGCGCAACGTTGATTGTTTGTCTGCGTAGAATCCCTCTGTTTGTATATAGCTTGAATCACGACATTTGTTCCCTTTCGCTTGAGGT
ACAGCGAAGTGTGAGTAAGTAAAGGTTACATCGTTAGGATCAAGATCCATTTTAAACACAAGGCCAGTTTTGTTACAGCGGCTTGTATGGGCCAG
TTAAAGAATTAGAAACATAACCAAGCATGTAATATCGTTAGACGTAATGCCGTCATTTTGTATCCCGGGGAGTCAGTGAACAGGTA
CCATTTGCCGTTTCAATTTAAAGACGTTCCGCGGTTCAATTTTCACTGTACTGTGTTAGATGCAATCAGCGGTTTTCATCACTTTTTTTCAGTGTG
TAATCATCGTTTAGTCAATCATACCGAGAGCGCGTTTGTCTAATCAGCCGTGCGTTTTTTATCGCTTTGCAGAAAGTTTTGACTTTCTTGAC
GGAAGAATGATGTGCTTTTGCCATAGTATGCTTTGTTAAATAAAGATTCTTCGCTTGGTAGCCATCTTCAGTCCAGTGTGTTGCTTCAAATAC
TAAGTATTTGTGGCCTTTATCTTCTACGTAGTGAGGATCTCTCAGCGTATGTTTGTGCGCTGAGCTGAGTGTAGTTGCCCTCATCGATGAATGCTGT
ACATTTTGATACGTTTTTCCGTCACCGTCAAAGATTGATTATAATCTCTACACCGTTGATGTTCAAAGAGCTGTCTGATGCTGATACGTTAA
CTTGTGCGAGTTGTGAGTGTGTTTGGCCGTAATGTTTACCGGAGAAATCAGTGTAGAATAAACGGATTTTCCGTCAGATGTAATGTGGCTGA
ACCTGACCATTCTTGTGTTTGGTCTTTTAGGATAGAATCATTTGCATCGAATTTGTGCGTGTCTTTAAAGACGCGGCCAGCGTTTTTCCAGCTG
TCAATAGAAGTTTTCCCGACTTTTTGATAGAACATGTAATCGATGTGTGTCATCCGCATTTTAGGATCTCCGGCTAATGCAAAAGACGATGTGGT
AGCCGTGATAGTTTGGCAGAGTGGCGTACGCGTTTTGTAATGGCCAGCTGTCCAAAACGTCACAGGCTTTTGCAGAAAGAGATATTTTAAATGTT
GGACGAATCAAATCAGAAACTTGATATTTTCAATTTTTTGTGCTGTTACAGGATTTGCAGCATATCATGGCGTGAATATGGAAATGCCGTAT
GTTTCCCTTATATGGCTTTTGGTTCGTTCTTTTCGAAAACGCTTGAAGTGGCGCTCCTGCCAGCAGTGGCGTAGTAAAGGTTAATACTGTTGCTT
GTTTTGCAAACTTTTTGATGTTTCATCGTTCATGCTCTCTTTTTATGTAATGTTGTTAGCGGCTCGCTTCTCCAGCCCTCGTTTTGAAGATGG
CAAGTTAGTTACGCACAATAAAAAAAGACCTAAAAATGTAAGGGGTGACGCCAAAGTATACACTTTGCCTTTACATTTTAGGCTTTCCT
```

GCTTTATCAGTAACAACCCGCGGATTTACTTTTCGACCTCATCTATTAGACTCTCGTTTGGATTGCAACTGGTCTATTTTCCTCTTTTGT  
TGATAGAAAATCATAAAAGGATTTCGAGACTACGGGCCTAAAGAATAAAAAATCTATCTGTTTCTTTTCATTCTCTGTATTTTTATAGTTTC  
TGTTGCATGGGCATAAAGTTGCCGTTTTTAATCACAATTCAGAAAATATCAATATCTCATTTCACATAAATAAGTGAACGGCAGGTATATGT  
GATGGGTTAAAAAGGATCGATCCTCTAGCGAACCCAGAGTCCCCTCAGAAAGACTCGTCAAGAAGCGGATAGAAGCGGATGCGCTGCGAATC  
GGGAGCGCGGATACCGTAAGCAGGAGGAGCGGTGAGCCATTGCGCGCAAGCTCTTACGCAATATCAGGGTAGCCACGCTATGCTCTGA  
TAGCGGTCCGCCACACCCAGCCGACAGTGCATGAATCCAGAAAAGCGGCCATTTCCACCATGATATTCGGCAAGCAGGATCGCCATGGG  
TCACGACGAGATCCTCGCGTTCGGGCATCCGCGCCTTGAGCCTGGCGAACAGTTCGGCTGGCGGAGCCCTGATGCTCTTCGTCAGATCATC  
CTGATCGACAAGACCGGCTTCCATCCGAGTACGTGCTCGCTCGATGCGATGTTTTCGCTTGGTGGTTCGAATGGGCAGGTAGCCGATCAAGCGTA  
TGCAGCCGCGCATTCATCAGCCATGATGGATACTTTCTCGGCAGGAGCAAGGTGAGATGACAGGAGATCCTGCCCGGCACTTCGCCCAATA  
GCAGCCAGTCCCCTCCCGCTCAGTGACAACGTGAGCACAGTGCAGCAAGAACCGCCGCTCGTGGCCAGCCAGATAGCCGCGTGCCTCGTC  
TTGGATTTTATTACAGGGCACCGGACAGGTCCGTCTTGACAAAAGAACCGGGCGCCCTGCGCTGACAGCCGGAACACGGCGCATCAGAGCAG  
CCGATTGCTGTTGTGCCAGTCAAGCCGAAATAGCCTTCCACCCAGCGCGGAGAACCTGGGTGCAATCCATCTTGTTCATCATGCGAA  
ACGATCCTCATCTGTCTTTGATCAGATCTTGATCCCTGCGCCATCAGATCCTTGGCGGCAAGAAAGCATCCAGTTTACTTTGCAGGGCTT  
CCCAACCTTACCAGAGGGCGCCAGCTGGCAATTCGGTTCGCTGCTGCCATAAAACCGCCAGTCTAGCTATCGCCATGTAAGCCCACTG  
CAAGCTACCTGCTTTCTTTGCGCTTGGTTTTCCCTTGTCCAGATAGCCAGTAGCTGACATTCACCCGGAAAAAACCAGCCGCTTGC  
CAGGGCGGGTTTTTTTTTTCAGATAAAAAAATCCTTAGCTTTTCGTAAGGATGATTTCTGCAATTTGGCGCGCTTCTAGAAATGCATAGTGC  
GGCGCTGAGTCCGGCAAAAAACGGGCAAGGTGTACCACCTGCGCTTTTTCTTAAACCGAAAAGATTACTTCGCTTGGAGAGCGTTC  
ACCGACAACAACAGATAAAACGAAAGGCCAGTCTTTGACTGAGCCTTTTCGTTTTATTGATGCTGTTACCGGGTGAATCCTTCATTCCT  
CTATGTTATTAATAGTCTCTGAACTAACAAATAAGCAAGATCAAATGTGAAGAAACGCAAAATAAAGCAATTAAGATAATTTCTGTC  
TATCTGCTGGTATATTCAGTACTACTCAGAAATGAGTTTGTATGACAAAATCAGTATGTACCAAAATTAATTTGGCGCAATCGATCCTGTA  
ACTCTATTTTGTGCTTACCCTGGGTATTTGGCCATTTCAAAGCATCGGAAGTTAATCTCGTTTAGCTTCAGGGGACTATGAAGGCGCTG  
TAAAGGCTTCCAAGGAAGCGAAAAAGTTTTGTTGGTGGTCTTTGGTGGCGGCAATTTTCATTGCCATCTATTTGTGCTAGTGGTTATTCG  
CGCGCTTTGGTCAATAAAGTTACATTTTTGACTTTGCTTGTTCACCATTAACGAATACCATGTTAGTTTGAATAATTTATTC  
CCCATCTCCATTACTACCGCTAAGGCCAAGGAATTTAGTATTCAGTCTTTGGTAACCTAACCATTTGCTGTTGGCCACTCGACCATATGGG  
AGAGCTCCCAACGCGTTGGATGCATAGCTTGAATTTCTATAGTGTACCTAAATAGCTTGGCGTAATCATGGTCAATAGCTTTCTGTGTGA  
AATGTTATCCGCTCACAATCCACACAACATACGAGCCGGAAGCATAAAGTGTAAAGCCTGGGGTGCCTAATGAGTGAAGTAACTACATTA  
TTGCTTGGCGTCACTCCCGCTTCCAGTCCGGAACCTGCTGTCAGCTGCAATTAATGAATCGGCCAACCGCGGGGAGAGCGGTTTGGC  
TATTTGGCGCTTTCGCTTCCCTGCTCAGTCTGCTGCGTTCGCTTGGTTCGCTTCCGCTGCGCGGAGCGGATCAGTCACTCAAAGCGGTAATA  
CGGTTATCCACAGAATCAGGGGATAACGCAGGAAAGAACATGTGAGCAAAAGGCCAGCAAAAGGCCAGGAACCGTAAAAGGCCGCTTGTCTGG  
CGTTTTCCATAGGCTCCGCCCCCTGACGAGCATCAAAAAATCGACGCTCAAGTCAAGGTTGGCGAAACCCGACAGGACTATAAAGATACCA  
GGCGTTTTCCCTGGAAGCTCCCTCGTGGCTCTCCTGTTCCGACCCTGCCGCTTACCGGATACCTGTCGCTTTCCTCCTCGGGAAGCGTG  
GCCATTTCCATTACTACCGCTAAGGCCAAGGAATTTAGTATTCAGTCTTTGGTAACCTAACCATTTGCTGTTGGCCACTCGACCATATGGG  
ACCGCTGCGCTTATCCGGTAACATCGTCTTGAAGTCCAAACCGGTAAGACAGACTTATCGCCACTGGCAGCAGCCACTGGTAACAGGATTAG  
CAGAGCGAGGTATGATAGCGGTGCTACAGAGTTCTTGAAGTGGTGGCCTAACTACGGCTACACTAGAAGAACAGTATTTGGTATCTGCGCTG  
CTGAAGCAGTTACCTTCGGAAGAAAGAGTTGGTAGCTCTTGATCCGGCAAAACACCACCGCTGGTAGCGGTGGTTTTTTGTTTGAAGCAGC  
AGATTACCGCGCAAAAAAAGGATCTCAAGAAGATCCTTTGATCTTTTCTACGGGTCTGACGCTCAGTGAACGAAAACTACGTTAAGGGAT  
TTTTGGTATGAGATTATCAAAAAGGATCTTCACTAGATCCTTTTAAATTAATAAAGTAAATCAATCTAAAGTATATATGAGTAACT  
TGGTCTGACAGTTACCAATGCTTAAATCAGTGAAGCCTTATCTCAGCGATCTGTCTATTTTCGTTTATCCATAGTTGCCTGACTCCCGCTCGTGT  
AGATAACTACGATACGGGAGGCTTACCATCTGGCCCCAGTGTGCAATGATACCGCGAGACCCAGCTCACCGGCTCCAGATTTATCAGCAAT  
AAACCGCAGCCGAAAGGGCCGAGCGCAAGAGTGGTTCGCACTTTTCCGCTCCATCCAGTCTATTAATTTGTTGGCGGAAAGCTAGAGTA  
AGTAGTTCGCGAGTTAATAGTTTGGCAACGTTGTTGCCATTGCTACAGGCATCGTGGTGTACGCTCGTCTGTTGGTATGGCTTCAATTCAGCT  
CCGTTTCCCAACGATCAAGGCGAGTTACATGATCCCCATGTTGTGCAAAAAGCGGTTAGCTCCTTCGCTCCTCCGATCGTTGTGAGAAGTAA  
GTTGGCCGAGTGTATCACTCATGGTTATGGCAGCACTGCATAATCTCTTACTGTCTATGCCATCCGTAAGATGCTTTTCTGTGACTGGTGAG  
TACTCAACCAAGTCACTTGTAGAAATAGTGTATGCGGCGACCGAGTTGCTCTTGGCCGGCTCAATACGGGATAAATACCGCCACATAGCAGAA  
CTTTAAAAGTGTCTATCATTTGAAAACGTTCTTCCGGGGCAAAACTCTCAAGGATCTTACCGCTGTTGAGATCCAGTTCGATGTAACCCACTCG  
TGCACCCAACTGATCTTACGATCTTTTACTTTACCAGCGTTTCTGGGTGAGCAAAAACAGGAAGGCAAAATGCCGCAAAAAGGGAATAAGG  
CGGACACGGAAATGTTGAATACTCATACTCTTCTTTTTCAATATTTAAGCAATTTATCAGGGTATTTGTCTCATGAGCGGATACATATTTG  
AATGATTTAGAAAAATAAAATAAGGGTTCCGCGCACATTTCCCGAAAAGTGCACCTGATGCGGTGTGAAATACCGCACAGATGCGTAA  
GGAGAAAATACCGCATCAGGAATTTGAAGCGTTAATATTTTGTAAAATTCGCGTTAAATTTTTGTTAAATCAGCTCATTTTTTAACCAATAG  
GCCGAAATCGGCAAAATCCCTTATAAATCAAAAGAAATAGACCGAGATAGGGTTGAGTGTGTTCCAGTTTGAACAAGAGTCCACTATTAAGA  
ACGTGGACTCCAACGTCAAAGGGCGAAAAACCGTCTATCAGGGGATGGCCACTACGTGAACCATCACCTAATCAAGTTTTTTGGGTCGAG  
GTGCCGTAAGCACTAAATCGGAACCTAAAGGGAGCCCGCATTTAGAGCTTGACGGGGAAAGCCGGCGAACGTTGGCGAGAAAGGAAGGAA  
AAAGCGAAAGGAGCGGGCTAGGGCGTGGCAAGTGTAGCGGTACGCTGCGGTAACCA

**Supplementary Figure S13.** Plasmid pSN8KS. The plasmid map with the main features highlighted is depicted in **A** and the FASTA formatted sequence in **B**. N8.3 – 3' homologous region for site N8; N8.5 – 5' homologous region for site N8; TT – double transcriptional terminators; Amp<sup>R</sup> – gene encoding the protein responsible for ampicillin resistance; Km<sup>R</sup> – gene encoding the protein responsible for neomycin/kanamycin resistance; *sacB* – gene encoding the protein responsible for sucrose sensitivity.

**A**

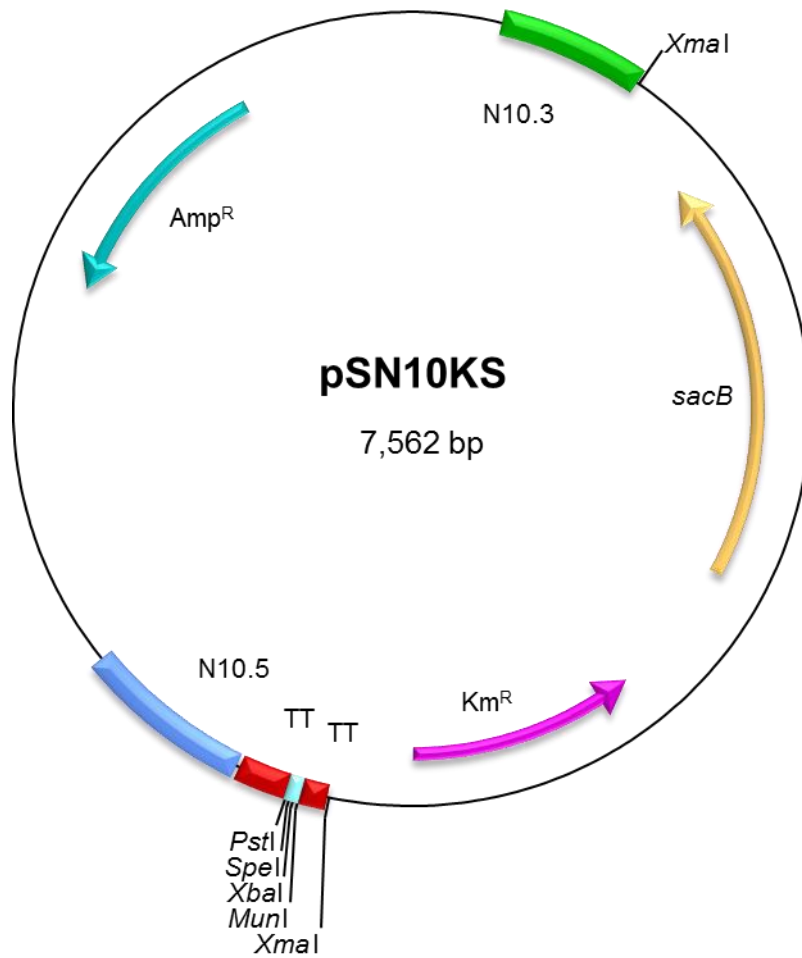

**B**

>pSN10KS

```
CACCCGCCGCGCTTAATGCGCCGCTACAGGGCGCGTCCATTGCGCATTAGGCTGCGCAACTGTTGGGAAGGGCGATCGGTGCGGGCCTCTTCG
CTATTACGCCAGCTGGCGAAAGGGGATGTGCTGCAAGCGATTAAAGTTGGGTAACGCCAGGGTTTCCAGTCACGACGTTGTAAAACGACGG
CCAGTGAATTGTAATACGACTCACTATAGGGCGAATTGGGCCGACGTCGCATGCTCCCGCCGCCATGGCGGCCGCGGAATTCGATTGGACT
GACCAAGATACAGTGGTAGCTTCAAGTTCGTCAATCAACCCCAATGGAAAGCTGAGATAATCTGTTGTTGATGCGACCGTCTTCATTTAGCT
AAAAAGACAAGTCTGTGGCTAGTTACTATGACGAGGCCATCGGGTCTATCCAGCGGTCTTGCTGATTCCAAAACCTGGCGATTTTCTGAAGTA
GTATCTTTTACCAGCTTAAGCCGCAAGGCTTTGGATGAGCTTGGTCGAATCATCTTTTGATGCCTCGACATCGCGAATAACTTTGTAAACGAC
CTTCCCGAGCTTGAATGCAAGTCGGTTAGATTATCCATCAGAGTTGAATGCCGATAATACAGACTGCTATACTATTTTAAATGAAAAGAGTGCT
GGCAAGCAAGCCCGCAACGTTGAAGCTGTGACGCGCAACGAAGCGCATTGTAAGTTTGCCTCGGATTACACCCGGGCAAGCGGATGGCTGA
TGAAACCAAGCCAACCAAGGAAGGCGAGCCACCTATCAAGGTGTAAGTGCCTTCCAGACGAACGAAGCGGATTGAGGAAAAGGCGCGCGGCC
GGCATGAGCCTGTGCGCCTACCTGCTGGCCGTGCGCCAGGGCTACAAAATCACGGGCGTGTGGACTATGACACGCTCCGCGAGGGCGTCCCGG
AAAACGATTCCGAAGCCCAACCTTTCATAGAAGGCGCGGTGGAATCGAAATCTCGTGATGGCAGGTTGGGCGTGCCTTGGTCCGTCATTTCCG
TCGGTACCATCGGCATTTTCTTTTGGCTTTTATTTGTTAACTGTTAATGTCTTGTTCAGGATGCTGCTTTTGACAACAGATGTTTTCTTG
CCTTTGATGTTACAGCAGGAAGCTCGGCGCAACGTTGATTGTTTGTCTGCGTAGAATCCTCTGTTTGTCAATAGCTTGTAAATCAGGACATGTT
TTCCTTTCCGCTTGAGGTACAGCGAAGTGTGAGTAAGTAAAGTTACATCGTTAGGATCAAGATCCATTTTAAACAAGCCAGTTTTGTTCAG
CGCTTGTATGGCCAGTTAAAGAATTAGAAACATAACCAAGCATGTAATATCGTTAGACGTAATGCCGCAATCGTCAATTTTGTATCCGCGG
GAGTCAGTGAACAGGTACATTTGCCGTTCAATTTAAAGACGTTCCGCGCTTCAATTTCACTGTTACTGTGTTAGATGCAATCAGCGGTTTCA
TCACTTTTTTCAAGTGTGTAATCATCGTTTAGCTCAATCAATACCGAGAGCCGCTTTGCTAACTACGCCGTGCGTTTTTTATCGCTTTGCAGAA
TTTTGACTTCTTGACGAAGAATGATGTGCTTTGCCATAGTATGCTTTGTTAAATAAGATTCTTCGCTTGGTCCGCGATCTTCAGTTCCA
GTGTTTGTCTCAATACTAAGTATTTGTGGCCTTTATCTTCTACGTAGTGAGGATCTCTCAGCGTATGGTTGTGCGCTGAGCTGTAGTTGCCTT
CATCGATGAAGTGTGATACATTTTGTATGCTTTTCCGTCACCGTCAAAAGATTGATTTATAATCCTCTACACCGTTGATGTTCAAAGAGCTGTC
TGATGCTGATACGTTAACTTGTGACGTTGTCAGTGTGTTTGTGCGGTAATGTTTACCGGAGAAATCAGTGTAGAATAAACGGATTTTCCGTC
GATGAAATGTGGCTGAACCTGACCATTTCTGTGTTGGTCTTTTAGGATAGAATCATTTGCATCGAATTTGTGCGTGTCTTTAAAGACCGCGC
CAGCGTTTTTCCAGCTGTCAATAGAAGTTTCGCCGACTTTTGTATAGAACATGTAATCGATGTGTCATCCGCAATTTTAGGATCTCCGGCTAA
TGCAAGACGATGTTGTTAGCCGTGATAGTTTGGCAGAGTCCGCTCAGCGTTTTGTAATGGCCAGCTGTCCCAAACGTCAGGCTTTTGCAGAA
GAGATATTTTAAATGTTGACGAAATCAAAATTCAGAAACTTGATATTTTTTCAATTTTTTGTGTTTCCAGGATTTGCAGCATATCATGGCGTAA
TATGGGAAATGCCGATGTTTCCCTATATGGCTTTTGGTTCGTTCTTTCCGCAACGCTTGAGTTGCGCTCCTGCCAGCAGTGCCTGATGAA
GGTTAAACTGTTGCTGTTTGGCAAACTTTTGTATGTTTCATCGTTCATGTCTCCTTTTTTATGTAAGTGTGTTAGCGGCTGCTTCTCCAGCC
CTCCTGTTTGAAGATGGCAAGTTAGTTACGCACAATAAAAAAGACCTAAAATATGTAAGGGGTGACGCCAAGTATACACTTGGCCTTTACA
```

CATTTTAGTCTTGCCTGCTTTATCAGTAACAAACCCGCGGATTTACTTTTCGACCTCATTCTATTAGACTCTCGTTTGATTGCAACTGGTC  
TATTTTCTCTTTTGTGTTGATAGAAAATCATAAAAGGATTTGCAGACTACGGGCTAAAGAACTAAAAATCTATCTGTTTCTTTTCATTCTCT  
GTATTTTATATAGTTTCTGTTGCATGGGCATAAAGTTGCCCTTTTAAATCAAAATTCAGAAAATATCATAATATCTCATTTCACATAAAATAGT  
GAACGGCAGGTATATGTGATGGGTAAAAAAGATCGATCCTCTAGCGAACCCAGAGTCCCGCTCAGAAGAACTCGTCAAGAAGCGGATAGAAG  
GCGATGCGCTGCGAATCGGGAGCGGCGATACCGTAAAGACAGGAGGAGCGGTACGCCATTCGCCGCCAAGCTCTTCAGCAATATCACGGGTAG  
CCAACGCTATGCTCTGATAGCGGTCCGCCACACCCAGCCGGCCACAGTCGATGAATCCAGAAAAGCGGCCATTTTCCACCATGATATTCGGCAA  
GCAGGCATCGCCATGGGTACGACGAGATCCTCGCCGTGGGCATCCGCCCTTAGCCCTGGCGAACAGTTCGGCTGGCGCGAGCCCTGATGC  
TCTTCGTCAGATCATCTGATCGACAAGACCGGCTTCCATCCGAGTACGTGCTCGCTCGATGCGATGTTTCGCTTGGTGGTCAATGGGCAGG  
TAGCCGATCAAGGATGACGAGCCGCCGATTCGATCAGCCATGATGGATACTTCTCGGAGGAGCAAGGTGAGATGACAGGAGATCCTGCC  
CGGCACTTCGCCAATAGCAGCCAGTCCCTTCCCGCTTCACTGACAACGTCGAGCACAGTTCGCAAGGAACGCCGCTCGTGGCCAGCCAGAT  
AGCCGCGCTGCCCTGTTGGAGTTCATTACGGGCACCGGACAGGTTCGGTCTTGACAAAAGAACCGGGCCGCCCTGCGCTGACAGCCGGAACA  
CGCGGCATCAGAGCAGCCGATTGCTGTGTGTCGCCAGTCATAGCCGAATAGCCCTTCCACCCAAAGCGGCCGAGAACCTGCGTGAATCCATC  
TTGTTCAATCATGGAAAGGATCCTCATCTGTCTCTTGATCAGATCTTGATCCCTGCGCCATCAGATCCTTGGCGCAAGAAAGCCATCCAG  
TTTACTTTGCAGGGCTTCCCAACCTTACCAGAGGGCGCCCGAGTGGCAATCCGGTTCGCTTGTGTCCATAAAACCCGCCAGTCTAGCTATC  
GCCATGTAAGCCATGCAAGTACCTGCTTCTCTTTGGCTTCGGTTTCCCTTGTCAGATAGCCAGTACGATTCACCCGGGAAAA  
AAAAACCCCGCCCTGACAGGGCGGGTTTTTTTTTTCAGATAAAAAAATCCTTAGCTTTTCGTAAGGATGATTTCTGCAATTCGGCGCCGCTC  
TAGAATGCACTAGTAGCGGCGCTGCAGTCCGGCAAAAAACGGGCAAGGTGTACCACCTGCCCTTTTCTTTAAACGAAAAGATTACTT  
CGGTTGGAGAGCGTTACCGGACAAAACAAGATAAAAAGAAAGCCAGTCTTTTCGACTGAGCCTTTTCGTTTTATTTGATGCTGGTACCGGG  
TGTAATCCCATACTCAGCTTCTAATGCTGAGAGAATGCTGAAAAGAACCTAAGTCAAATTTTGGATTAAGTTTTATTAAGTCAACGG  
AGGTGTCAGATAGCATTGATAAAGCATAACGGCATGAAACCACTGAACCGGCTTCCAGAGGTTAACCCAGGTTTATGGTTTACCAAA  
ATCCCTGACTTTTTCCGAGTTGGGGGACAAAACAATAATTTGGGCGACGATTTTTCTGCTATCTGGCGATCGCCATGTTGCTAATCTC  
TGATCCAACCTAGGTTTTTGGGGGCTTTCCAAACAAAAATCCCGTTCGCCGGCAAAAAATGCTGGTGGGGCACAAATTTGGTGTCTCCGTA  
TCTGCAAACTGCCAGTAAACTTGGCTTCCGCAAAACATCCCTGGTGGGAAATAATCGGGACTTCAACTTAAACGCTTACGCAAGGT  
ACCAAAACAGGCTTGGAAAATACCCGTCGCAAAAGGGCATTTAAATCCACCGGCGACTCCGACATATGGGAGAGCTCCCAACCGGTTGGATG  
CATAGCTTGAGTATCTATAGTGTACCTAAATAGCTTGGCGTAATCATGGTCAATAGCTGTTTCTGTGAAATGTTATCCGCTCACAATC  
CACACAACATACGAGCCGGAAGCATAAAGTGTAAAGCCTGGGGTGCCTAATGAGTGAGCTAACTCACATTAATTGCGTTGCGCTACTGCCCGC  
TTCCAGTCGGAAACCTGTGCTGCCAGCTGCATTAATGAATCGGCCAACGCGCGGGGAGAGGCGGTTGCGTATTGGGCGCTTCCGCTTCC  
TCGCTACTGACTCGCTGCGCTCGCTGCGCTGCGGCGAGGCGCATCAGCTCACTCAAAGGCGGTAATACGGTTATCCACAGAAATCAGGGG  
ATAACGAGGAAAGAACATGTGAGCAAAAGGCCAGCAAAAGGCCAGGAACCGTAAAAGGCCGCGTGTGCTGGCGTTTTTCCATAGGCTCCGCCC  
CCCTGACGAGCATCACAATAACGACGCTCAAGTCAGAGGTGGCGAAACCCGACAGGACTATAAAGATACAGGCGTTTTCCCTGGAAGCTCC  
CTCGTGGCTCTCCTGTTCCGACCTGCCGCTTACCGGATACCTGTCCGCTTTCTCCCTTCGGGAAGCGTGGCGCTTTCATAGCTACAGCT  
GTAGGTACTGACTGAGTTCGCTTCCGCTTCCGCTTCCGCTTCCGCTTCCGCTTCCGCTTCCGCTTCCGCTTCCGCTTCCGCTTCCGCTTCCGCT  
CTATCGTCTGAGTCCAACCCGTAAGACACGACTTATCGCCACTGGCAGCAGCCACTGGTAACAGGATTAGCAGAGCGAGGTATGATGGCGGT  
GCTACAGAGTTCTTGAAGTGGTGGCCTAATACGGCTACTAGAGAAGCAGTATTTGGTATCTGCGCTCGCTGAGGCCAGTTACTTCCGAA  
AAAGATTTGGTAGCTCTGATCCGGCAAAACACCCGCTGGTAGCGGTGGTTTTTTTGTGTTGCAAGCAGCAGATTACGCGCAGAAAAAAGG  
ATCTCAAGAAGATCCTTTGATCTTTTCTACGGGGTCTGACGCTCAGTGGAAACGAAAACCTCAGCTTAAGGGATTTTGGTCAAGATTATCAAAA  
AGGATCTTACCTAGATCCTTTTAAATTAATAAGTTTTAAATCAATCTAAAGTATAATAGATAAACTTGGTCTGACAGTTACCAATGCT  
TAATCAGTGAGGACATCTCAGCGATCTGTCTATTTTCGTTCAATAGTTCAGTTCAGTCCCGCTCGTGTAGATAACTACGATACGGGAGGG  
CTTACCATCTGGCCCCAGTGTGCAATGATACCGCGAGACCAGCTCACCAGCTCCAGATTTATCAGCAATAAACAGCCAGCCGGAAGGGCC  
GAGCGCAAGAGTGGTCTGCAACTTTATCCGCTTCCAGTCTATTAAATTTGTCGGGGAAGCTAGAGTAAGTAGTTTCGCCAGTTAATAGTT  
TGCGCAACGTTGTTGCCATTGCTACAGGCATCGTGGTGTACGCTCGCTTGGTATGGCTTCAATTCAGCTCCGGTTCCCAACGATCAAGGCG  
AGTTACATGATCCCCATGTTGTGCAAAAAGCGGTTAGCTCCTCGGCTCCTCGATCGTGTGCAAGTAAGTTGGCCGAGTGTATCACTC  
ATGGTTATGGCAGCACTGCATAATTTCTTACTGTCTGCAATCCGTAAGATGCTTTTCTGTGACTGGTGGTACTCAACCAAGTCAATCTGAG  
AATAGTGTATGGCGCAGCGAGTTGCTCTTGGCCGGCTCAATACGGGTAATACCGCGCCACATAGCAGAACTTAAAAGTGTCTCATCATTGG  
AAAAGCTTCTTCGGGGGCAAACTCTCAAGGATCTTACCCTGTTGAGATCCAGTTCGATGTAACCCACTCGTGCACCCAACTGATCTTCAGCA  
TCTTTTACTTTTACCAGCGTTTTCGGGTGAGCAAAAACAGGAAGGCAAAATGCCGCAAAAAGGGAAATAAGGGCGACACGGAAATGTTGAATAC  
TCATACTTCTCTTTTCAATATTTAAGCATTTATCAGGGTATTGTCTCATGAGCGGATACATATTTGAATGATTTAGAAAAATAAACA  
AATAGGGGTTCCGCGCACATTTCCCGAAAAGTGCCACCTGATGCGGTGTGAAATACCGCACAGATGCGTAAGGAGAAAAATACCGCATCAGGAA  
ATTGTAAGCGTTAATATTTGTTAAAATTCGCGTTAAATTTTGTAAAATCAGCTCATTTTTAAACCAATAGGCCGAAATCGGCAAAATCCCTT  
ATAAATCAAAAGAAATAGACCGAGATAGGGTTGAGTGTGTTCCAGTTTGGAAACAAGAGTCCACTATTAAGAAACGTGGACTCCAACGTCAAAGG  
GCGAAAACCGCTATCAGGGCGATGGCCACTACGTGAACCATCACCCTAATCAAGTTTTTGGGGTCGAGGTGCCGTAAGCACTAAATCGG  
AACCTAAAGGGAGCCCGATTTAGAGCTTACGCGGGAAGGCCGCGAACGTGGCGAGAAAGGAAGGAAGAAAGCGAAAAGGAGCGGGCGCTA  
GGCGCTGGCAAGTGTAGCGGTACGCTGCGGTAACCACCA

**Supplementary Figure S14.** Plasmid pSN10KS. The plasmid map with the main features highlighted is depicted in **A** and the FASTA formatted sequence in **B**. N10.3 – 3’ homologous region for site N10; N10.5 – 5’ homologous region for site N10; TT – double transcriptional terminators; Amp<sup>R</sup> – gene encoding the protein responsible for ampicillin resistance; Km<sup>R</sup> – gene encoding the protein responsible for neomycin/kanamycin resistance; *sacB* – gene encoding the protein responsible for sucrose sensitivity.

A

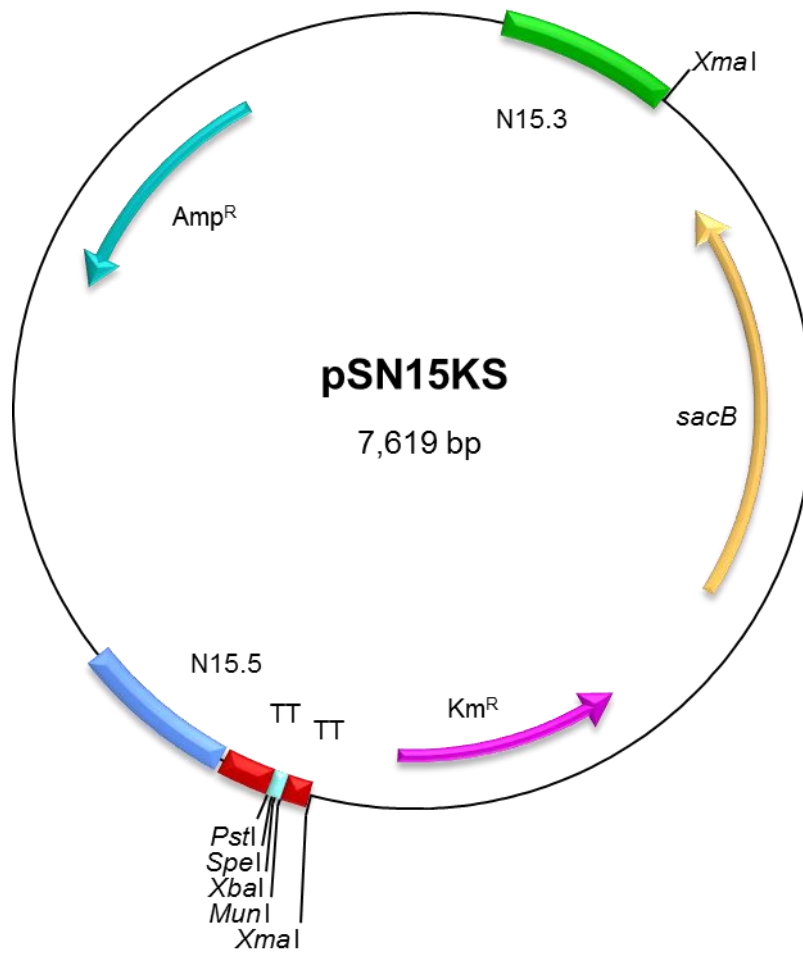

B

>pSN15KS

```
CACCCGCGCGCTTAATGCGCCGTACAGGGCGCGTCCATTCGCCATTCAGGCTGCGCAACTGTTGGGAAGGGCGATCGGTGCGGGCCTCTTCG
CTATTACGCCAGCTGGCGAAAGGGGATGTGCTGCAAGCGATTAAGTTGGGTAACGCCAGGGTTTTCCAGTACAGACGTTGTAAAACGACGG
CCAGTGAATTGTAATACGACTCACTATAGGGCGAATTGGGCCGAGCTCGCATGCTCCCGCCGCCATGGCGGCCGCGGGAATTCGATTCTAAA
CTTACGGCATTGGCATCAACGGGAGCCACCGTCCGGAGTAGGGGAAAGTAACAACGGGGGAACTGGTATTGGTGGGCAAAAATTTTACTAGCCATT
GATTCATTGGGGCAGATTGAACGCTCCCAACCACCAAGTCCCCCTAATAACAACGACAGAACTAATAACAGGAAAAAGGAATCCAAGGAGT
TACCCCTCTTTATGGGATGGAACCTCATCGACATTAAGGTGGGAGGGGAGGGCAATGGGGACAATGGTGGTCCGAGAAAAGGAAGGTGGC
TCCGACGTCAAGGCAACGGGACATCCACAGGATTCACAGAAACGAACCTGGGGGCTAAGGCGGTTGCCACAATTAGTACAAAAACGGGAGTAG
TCATAGGTGAAAACCCCGACTATAGAATTAGAAAAATTTAACTTTTTATCCGAATTTTATTCGTCATGTTCCCAATAACTATCAAAAATAT
TGGAAAAATTAATTAATTTGGTCGTTGGTCACCGCTCCCTAAAGACCTGGCCATTGTAAGAGATTACACCCGGCAAGCGGATGGCTGATGAA
ACCAAGCCAACCAAGGAAGGGCAGCCACCTATCAAGGTGTAACCGAGAGCGCGTTCCAGACGAACGAAGAGCGATTGAGGAAAAGCGCGCGCCGCA
TGAGCCTGTGCGCCTACCTGCTGGCCGTGGCCAGGGCTACAAAATCACGGGCGTCTGGACTATGAGCACGTCGCCGAGGGCGTCCCGGAAAA
CGATTCGAAGCCCAACCTTTTATAGAAGCGCGGTGGAATCGAAATCTCGTGATGGCAGGTTGGGCGTCGCTTGGTCGGTCATTTTCGCTCGG
TACCATCGGCATTTCTTTTGGCTTTTTATTTGTTAACTGTTAATTTGCTTGTTCAGGATGCTGTCTTTGACAACAGATGTTTTCTTGCCCTT
TGATGTTACAGGGAAGCTCGGCCAAAACGTTGATTTGTTGCTGCGTAGAATCCCTCTGTTTGTATATAGCTTGTAAATCACGACATTTGTTCC
TTTTGCTTTGAGGTACAGCGAAGTGTGAGTAAGTAAAGGTTACATCGTTAGGATCAAGATCCATTTTAAACACAAGCCAGTTTTGTTTCAGCGGC
TTGTATGGCCAGTTAAAGAATTAGAAACATAACCAAGCATGTAATATCGTTAGACGTAATGCCGTCATTCGTCATTTTTGATCCGCGGGAGT
CAGTGAACAGGTACCATTTGCGCTTCATTTTAAAGACGTTCCGCGGTTCAATTTTCATCTGTACTGTGTTAGATGCAATCAGCGGTTTCATCAC
TTTTTTCAGTGTGTAATCATCGTTTAGCTCAATCATACCAGTAGCGGTTGCTTACACTAGCGGTTGCTTTTTATCGCTTTCAGAAAGTTTT
TGACTTTCTTGACGGAAGAATGATGTGCTTTTGCCATAGTATGCTTTGTTAAATAAAGATTTCTTCGCTTGGTAGCCATCTTCAGTTCCAGTGT
TTGCTTCAAATACTAAGTATTTGTGGCCTTTATCTTCTACGTAGTGAGGATCTCTCAGCGTATGGTTGTGCGCCTGAGCTGTAGTTGCCTTATC
GATGAACGTGTACATTTTGATACGTTTTTCCGTCACCGTCAAGATTGATTTATAATCCTCTACACCGTTGATGTTCAAAGAGCTGTCTGAT
GCTGATACGTTAACTTTGTGACGTTGTGAGTGTGTTGTTGCGGTAATGTTTACCGGAGAAATCAGTGTAGAATAAACGGATTTTTCCGTCAGATG
TAAATGTGGCTGAACCTGACCATTCTTGTGTTGGTCTTTTAGGATAGAATCATTTGCATCGAATTTGTCGCTGTCTTTAAAGACGCGGCCAGC
GTTTTTCCAGCTGCAATAGAAGTTTCGCCGACTTTTTGATAGAACATGTAATCGATGTGTCATCCGCATTTTTAGGATCTCCGCTAATGCA
AAGACGATGTGGTAGCCGTGATAGTTTGCAGACGTGCCGTCAGCGTTTTGTAATGGCCAGCTGTCCCAAACGTCACAGGCTTTTTGCAGAAAGAG
TATTTTTAATTGTGGACGAATCAAATTCAGAACTTGATATTTTTCATTTTTTCTGTTTCAGGGATTTGCAGCATATCATGGCGTGAATATG
GGAAATGCCGATGTTTCCCTTATATGGCTTTTGGTTCGTTTTCTTCGCAACGCTTGAGTTGGCCTCTGCCAGCAGTGGGTTAGTAAAGGTT
AATACTGTGCTTGTGTTTTGCAAACTTTTTGATGTTTCATCGTTCATGCTCTCTTTTTTATGTAAGTGTGTTAGCGGTTGCTCTTCCAGCCCTCC
```

TGTTTGAAGATGGCAAGTTAGTTACGCACAATAAAAAAGACCTAAAATATGTAAGGGGTGACGCCAAAGTATACACTTTGCCCTTTACACATT  
TTAGGCTTGCCTGCTTTATCAGTAACAACCCGCGCATTTACTTTTCGACCTCATTCTATTAGACTCTCGTTTGGATTGCAACTGGTCTATT  
TTCTCTTTTGTGTGATAGAAAATCATAAAAGGATTTGACAGACTACGGGGCTAAAGAACTAAAAATCTATCTGTCTTTTTCATCTCTGTAT  
TTTTTATAGTTTCTGTTGATGGGCATAAAGTTGCCTTTTTTAATCACAATTCAGAAAATATCATAATATCTCATTTCCTAAATAATAGTGAAC  
GGCAGGTATATGTGATGGGTTAAAAAGGATCGATCCTCTAGCGAACCCAGAGTCCCGCTCAGAAGAAGCTCGTCAAGAAGGCGATAGAAGCGA  
TGCGCTGGCAATCGGGAGCGGCGATACCGTAAAGCAGCAGGAAGCGGTAGCCCATTCGCGGCCAAGCTCTTCAGCAATATCACGGGTAGCCAA  
CGCTATGTCTGATAGCGGTCCGCGCACACCCAGCGGCCACAGTCTGATGAAATCCAGAAAAGCGGCCATTTCCACCATGATATTCGGCAAGCAG  
GCATCGCCATGGGTACAGCAGAGATCCTCGCCGTCGGGCATCCGCGCCTTGAGCCTGGCGAACAGTTCGGCTGGCGCAGCCCTGATGCTCTT  
CGTCCAGATCATCTGATCGACAAGACCGGCTTCCATCCGAGTACGTGCTCGCTCGATGCGATGTTTCGCTTGGTGGTTCGAATGGGAGGTAGC  
CGGATCAAGCGTATGCAGCCGCGCATTCATCAGCCATGATGGATCCTTCTCGGCAGGAGCAAGGTGAGATGACAGGAGATCCTGCCCGGCG  
ACTTCGCCCCAATAGCAGCCAGTCCCTTCCGCTTCAGTGACAACGCTCGAGCACAGTGGCAAGGAACGCCCGCTGTTGGCCAGCCAGCAGTACG  
GGCTGCCTCGTCTTGGAGTTTATTTCAGGGCACCGGACAGGTTCGCTTTGACAAAAAGAACCGGGCGCCCTGCGCTGACAGCCGGAACCGGC  
GGCATCAGAGCAGCGGATGTCTGTTGTGCCAGTTCATAGCCGAATAGCCTCTCCACCCAGCGCGGAGAACCCTGCGTGCATCCATCTGTGT  
TCATCATGCGAAACGATCCTCATCTGTCTTTGATCAGATCTTTGATCCCTTGGCCATCAGATCCTTGGCGGCAAGAAAGCCATCCAGTTTA  
CTTTGACGGGCTTCCCAACCTTACCAGAGGGCGCCAGTGGCAATCCGGTTGCTGCTGCCATAAAACCGCCAGTCTAGTCTAGTATCGCCA  
TGTAAAGCCACTGCAAGCTACTCTTTCTTTTGGCTTTCGCTTTTCCCTTGTCCAGATAGCCAGTAGCTGACATTCACCCGGAAAAAAA  
ACCCCGCCCTGACAGGGGGGGTTTTTTTTCAGATAAAAAAATCCTTAGCTTTTCGCTAAGGATGATTTTTCGAATTTGGGCGCGCTTCTAGA  
ATGCACTAGTAGCGCGCTGCAGTCCGGCAAAAAACGGGCAAGGTGTACCACCTTGCCTTTTTTCTTAAAAACCGAAAGATTACTTCGCG  
TTGGAGAGCGTTCACCGCAAAACAACAGATAAAACGAAAGGCCAGTCTTTCGACTGAGCCTTTCGTTTTATTTGATGCCGTGACCGGGTGA  
ATCCATTTGGGCACGAGATGTAGTAAAGGAGTGGCAATTAATAGAGCTTATGGTTGATTTCGCAATGTTTTGCTCGTGAAATTTTCGGCAAAATAC  
AAACTTTCGCTCTTCTAGCCCTATTAACCATTTTAACGACAATTTGATGGGCAACGATTAACAATAATGAATAAATTTATGTTTTTCAAG  
ATGAAAAATTTGAAAAATTTGATTTCTTATATTTCTACTATAGAGACTAATACAATTAGATCTAAAAATTTGCAAGTATAAAAAATCAGCAATAG  
TTATATTTGTTAATAATTCATGACCAATAACTCGTACTGTTATCTACGTGGTAAAGCCAAAAAGCAGAACAGTTTAGCTCCTCCTCCTCGG  
CGATCGCCAAAGCGAAATGTCATGGGAGATGTTACAGATTGAGCTTTTTTCTTAAAAGCCCTTGGTAAAAACAAACCACATGTTGAGGGTGTCC  
GATGTTGACTAAATTCAGCGCTCGACCATATGGGAGAGCTCCCAACCGCTTGGATGCATAGCTTGAATTTCTATAGTGCACCTAAATAGCT  
TGGCGTAATCATGGTTCATAGCTGTTTCCGTGTGAAATGTTATCCGCTCACAATTTCCACACAACATACGAGCCGGAAGCATAAAGTGTAAAGC  
CTGGGTCCTAATGAGTGAGCTAACTACATTAATTGCTGTGCGCTACTCCCGCTTTCCAGTCCGGAACCTGTGCTGCCAGCTGCATTA  
TGAATCGGCCAACCGCGGGGAGGCGGTTTGGCTATTTGGGCGCTTTCGCTTCCCTCGCTCACTGACTCGTGCCTCGCTGCTGCTGCTGCTG  
GGCAGCGGTATCAGCTCAAAAGCGGTAATACGGTTATCCACAGAATCAGGGGATAACGCAGGAAAGAACATGTGAGCAAAAGGCCAGCA  
AAAGGCCAGGAACCGTAAAAAGCGCGCTGTGCTGGCGTTTTTCCATAGGCTCCGCCCCCTGACGAGCATCACAAAAATCGACGCTCAAGTCAG  
AGGTGGCGAAACCCGACAGGACTATAAAGATACCAGGCGTTTTCCCTTGAAGCTCCCTCGTGGCTCTCCTGTTCCGACCCTGCCGCTTACC  
GATTCGCGCCCGGTTTTTCCCTTCCGGAAGCTGGCGCTTTTCCATAGGCTCCGCCCCCTGACGAGCATCACAAAAATCGACGCTCAAGTCAG  
GCTGGGCTGTGTGCAGAACCCCGCTTACGCGGACCGCTGCGCTTATCCGGTAACTATCGTCTTGAAGTCCAAACCGGTAAGACAGACTTA  
TCGCCACTGGCAGGCCACTGGTAACAGGATTAGCAGAGCGAGGTATGTAGGCGGTGCTACAGAGTTCTTGAAGTGGTGGCCTAACTACGGCT  
ACACTAGAAGAACAGTATTTGGTATCTGCGCTCTGCTGAAGCCAGTTACCTTCGGAAAAAGAGTTGGTAGCTCTTATCAGCGCAAAACAACCC  
CGCTGGTAGCGGTTTTTTTTTGTGTTGCAAGCAGCAGATTTACGGCGAGAAAAAAGGATCTCAAGAAGATCCTTTGATCTTTTCTAGCGGCT  
GACGCTCAGTGGAAACGAAACTCACGTTAAGGGATTTTGGTCATGAGATTATCAAAAAGGATCTTACCCTAGATCCTTTTAAATTAATAATGAA  
GTTTTAAATCAATCTAAAGTATATATGAGTAAACTTGGTCTGACAGTTACCAATGCTTAATCAGTGGGACCTATCTCAGCGATCTGTCTATT  
TCGTTCAATCAGTATGCTGCTGACTCCCGCTCGTGTAGATAACTACGATACGGGAGGCTTACCATCTGGCCCCAGTGTGCAATGATACCGCGA  
GACCCAGCTCAGCGCTCAGATTTATCAGCAATAAAACAGCCAGCCGGAAGGCGGAGCGCAGAAGTGGTCTTCAACTTTTATCCGCGTCCA  
TCCAGTCTAATTAATTTGTTGCCGGGAAGCTAGAGTAAGTAGTTCCGCCAGTTAATAGTTTGGCAACGTTGTTGCCATTGCTACAGGCATCGTGGT  
GTCACGCTCGTCTTGGTATGGCTTCATTCAGCTCCGCTTCCCAACGATCAAGGCGAGTTACATGATCCCCATGTTGTGCAAAAAAGCGGTT  
AGCTCCTTCGGTCTCCGATCGTGTGTCAGAAGTAAGTTGGCCGAGTGTATCACTCATGGTTATGGCAGCACTGCATAATTTCTTACTGTCA  
TGCCATCCGTAAGATGCTTTTCTGTGACTGGTGTGACTCAACCAAGTCAATCTGAGAATAGTGTATGCGGCGACCGAGTGTCTTTCGCCGGC  
GTCATACCGGATAATACCGCGCCACATAGCAGAACTTTAAAAGTGTCTCATTTGGAAAACGTTCTTCGGGGCGAAAACCTCAAGGATCTTA  
CCGCTGTTGAGATCCAGTTCGATGTAACCCACTCGTGCACCCAAGTATCTTTCAGCATCTTTTACTTTTACCAGCGTTTTCGGGTGAGCAAAAA  
CAGGAAGGCAAAATGCCGCAAAAAGGGAAATAAGGGCGACAGGAAATGTTGAATACTCACTCTTCTTTTTCAATATTAATTGAAGCATTTA  
TCAGGGTTATTGTCTCATGAGCGGATACATATTTGAATGATTTTAGAAAAATAAACAATAAGGGGTTCCGCGCACATTTCCCGAAAAAGTGCCA  
CCTGATGCGGTGTGAAATACCGCACAGATGCGTAAGGAGAAAATACCGCATCAGGAAATGTAAGCGTAAATATTTTGTAAAATTCGCGTTAA  
ATTTTTGTTAAATCAGCTCATTTTTTAACCAATAGGCGGAAATCGGCAAAATCCCTTATAAATCAAAAAGATAGACCGGATAGGGTTGAGTGT  
TGTTCCAGTTTGGAAACAAGTCCACTATTAAGAAGCTGGACTCCAAGTCAAGGGCGAAAAACCGTCTATCAGGGCGATGGCCACTACGT  
GAACCATACCCCTAATCAAGTTTTTTGGGGTTCGAGGTCCGCTAAAGCACTAAATCGGAACCCCTAAAGGGAGCCCGGATTTAGAGCTTGACGGG  
GAAAGCCGCGAAGCTGGCGAGAAAGGAAGGAAAGCAAGGAGGCGGCTAGGGCGCTGGCAAGTGTAGCGGTACGCTGCGGCTAAC  
CACCA

**Supplementary Figure S15.** Plasmid pSN15KS. The plasmid map with the main features highlighted is depicted in **A** and the FASTA formatted sequence in **B**. N15.3 – 3’ homologous region for site N15; N15.5 – 5’ homologous region for site N15; TT – double transcriptional terminators; Amp<sup>R</sup> – gene encoding the protein responsible for ampicillin resistance; Km<sup>R</sup> – gene encoding the protein responsible for neomycin/kanamycin resistance; *sacB* – gene encoding the protein responsible for sucrose sensitivity.

A

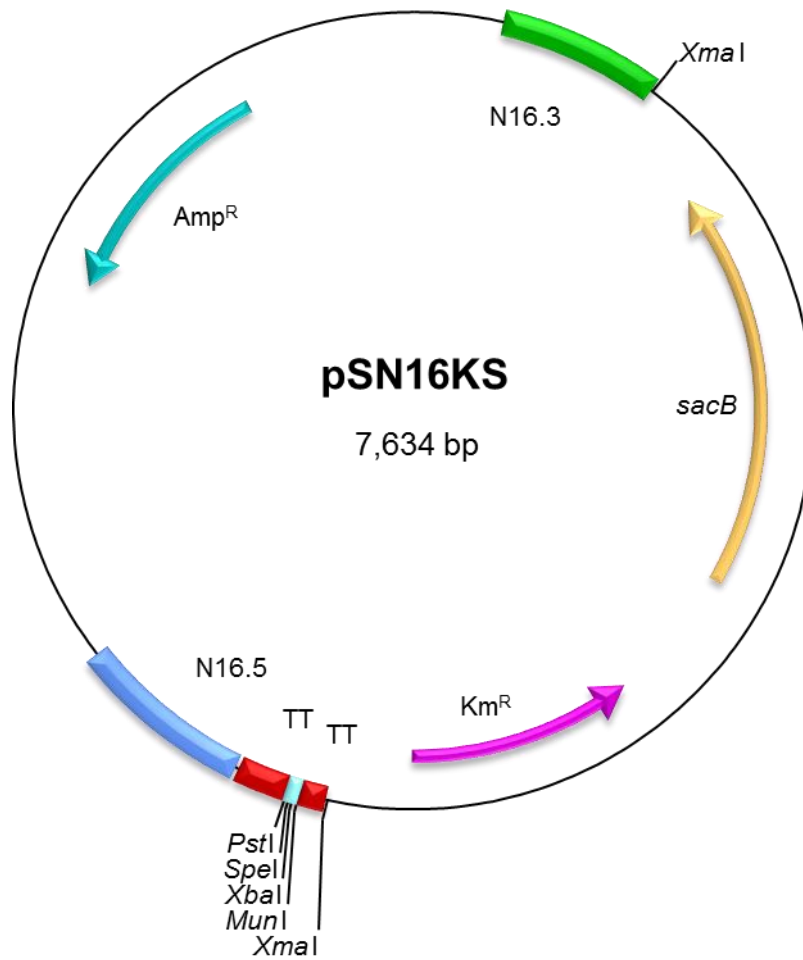

B

>pSN16KS  
CACCCGCCGCGCTTAATGCGCCGCTACAGGGCGCGTCCATTCGCCATTCCAGGCTGCGCAACTGTTGGGAAGGGCGATCGGTGCGGGCCTCTTCG  
CTATTACGCCAGCTGGCGAAAGGGGATGTGCTGCAAGGCGATTAAGTTGGGTAAACGCCAGGGTTTCCAGTCACGACGTTGTAAACGACGG  
CCAGTGAATTGTAATACGACTCACTATAGGGCGAATTGGGCCCGACGTCGCATGTCCCGGCCGCGCATGGCGGCCGCGGAATTCGATTGTGAG  
CTTGATGGTGATGGTGGGTAAAGCTTCATGTGTCATGCGCCGGAGCTTGACGGTAAAATCCGTGTCTGGGGCCAATCATGGGAACGCTCACA  
CAGATACCGTTGCGAGTTAAGTCGAAGGATAACCCCAACCAATTCCTCCATATCGAACACTTGGCAAAAGGCCAACATCCGCTCTTCCTGCC  
GTCGCTCCTGCACCCCTGGAGATGGGCAATGGTTAGGGCTCTTGGGAGAGGGAAGATGGAGAATCTTGAGCCATGGAGATTATTTCTCGGT  
TAAATTAGGTTTACCTAGTAAATGGGCCAGGTTGACCATTAATGTAGTCATTCCTGGGTCGATCTTCCTCCATCAGGGTCATTTGGTTAATT  
GTTGATGAGAAATGGGAAGGAGTAATCCATAGATATTTGCCAGTTAACTCGATTGAGCAGAATGGGAAGGACGATTTGGAACTTTGGTTG  
ACAGGGCAACAAAGCCAGCAGATTACACCCGGGCAAGCGGATGGCTGATGAAACCAAGCCAACAGGAAGGGCAGCCACCTATCAAGGTGTAC  
TGCCTTCCAGACGAACGAAGAGCATTGAGGAAAAGGCGGCGGCGGCGCATGAGCCTGTCGGCCTACCTGCTGGCCGCGGCCAGGGCTACA  
AAATCACGGGCGTCGTGGACTATGAGCACGTCCCGGAGGGCGTCCCGGAAAACGATTCCGAAGCCCAACCTTTTATAGAAGGCGGGTGGAAAT  
CGAAATCTCGTGATGGCAGGTTGGGCGTCGCTTGGTCGGTCATTTTCGCTCGGTACCATCGGCATTTTCTTTTTCGCTTTTATTTGTTAACGT  
AATTGTCCTTGTTCAGGATGCTGCTTTTGACAACAGATGTTTTCTTGGCTTTGATGTTTCAGCAGGAAGCTCGGGCGCAACGTTGATTTGTTGT  
CTCGGTAGAATCCTCTGTTTGTATAGCTTGTAAATCAGACATGTTTCTTTTCGCTTGAGGTACAGCGAAGTGTGAGTAAGTAAAGGTTAC  
ATCGTTAGGATCAAGATCCATTTTAAACAAGGCCAGTTTTGTTTCAGCGGCTTGTATGGGCCAGTTAAAGAATTAGAAACATAACCAAGCATG  
TAAATATCGTTAGACGTAATGCCGTCATCGTCATTTTGTATCCGCGGGAGTCAGTGAACAGGTACCATTTGCCGTTTCAATTTAAAGACGTTTCG  
CGGTTCAATTTTCACTGTTACTGTGTTAGATGCAATCAGCGGTTTCATCACTTTTTTTCAGTGTGTAATCATCGTTTAGCTCAATCATACCGAG  
AGCGCCGTTTGTAACTCAGCCGTGCGTTTTTTATCGCTTTGAGAAGTTTTTGACTTTCTTGACGGAAGAATGATGTGCTTTTGCCATAGTAT  
GCTTTGTTAAATAAAGATTCTTCGCCCTGGTAGCCATCTTCAGTTCAGTGTGTTGCTTCAAATACTAAGTATTTGTCGCCCTTATCTTCTACGT  
AGTGAGGATCTCTCAGCGTATGGTTGTCGCTGAGCTGTAGTTGCTTTCATCGATGAACGCTGTGACATTTTGATACGTTTTTCCGTCACCGTC  
AAAGATTTGATTTAATCTCTACACCGTTGATGTTCAAGAGCGTGTCTGATGCTGATACGTTAACTTGTGCAGTTGTGAGTGTGTTGTTGCCG  
TAATGTTTACCGGAGAAATCAGTGTAGAATAAACGGATTTTTCCGTCAGATGTAATGTGGCTGAACCTGACCATTTCTGTGTTTGGCTTTTTA  
GGATAGAATCATTTGCATCGAATTTGTCGCTGTCTTTAAAGACGGCGCCAGCGTTTTTCCAGCTGTCAATAGAAGTTTCGCCGACTTTTTGATA  
GAACATGTAAATCGATGTGTCATCCGATTTTTAGGATCTCCGGTAATGCAAGACGATGTGGTAGCCGTGATAGTTTGGCACAGTGCCGTC  
GCCTTTTGTAAATGCCCAGCTGTCCCAAACGTCAGGCTTTTTGAGAAGAGATATTTTTAATTTGGACGAATCAAAATTCAGAACTTGATATT  
TTTCATTTTTTGTGTTTTCAGGATTTGACGATATCATGGCGTGAATATGGGAAATGCCGATGTTTCTTATATGGCTTTTGGTTTCGTTTC  
TTTCGCAACAGCTTGAGTTGCGCCTCCTGCCAGCAGTGCCTGAGTAAAGGTTAACTACTGTGCTTTGTTTTGCAAACTTTTTGATGTTTCATCGTT  
CATGTCTCCTTTTTTATGTAAGTGTGTTAGCGGCTGCTTCTTCCAGCCCTCCTGTTTGAAGATGGCAAGTTAGTTACGCACAATAAAAAAGAC

CTAAAATATGTAAGGGGTGACGCCAAAGTATACACTTTGCCCTTTACACATTTTAGGCTTGCCTGCTTTATCAGTAACAAACCCGCGCATTT  
ACTTTTCGACCTCATTCTATTAGACTCTCGTTTGGATTGCAACTGGTCTATTTTCTCTTTTGTGATAGAAAAATCATAAAAGGATTTGCAGA  
CTACGGCCCTAAAGAACTAAAAATCTATCTGTTTCTTTTTCATTCTCTGTATTTTATAGTTTCTGTTGCGATGGGCATAAAGTTGCCCTTTTA  
ATCACAATTCAGAAAATATCATAATATCTCATTCTACTAAATAAGTGAACGGCAGGTATATGTGATGGGTAAAAAGGATCGATCCTCTAGC  
GAACCCAGAGTCCCGCTCAGAAGAACTCGTCAAGAAAGGGATAGAAGGGATGCGCTGCGAATCGGGAGCGGGCATACCGTAAAGCACGAGGA  
AGCGGTACGCCATTCGCGCCAAAGCTCTTCAGCAATATCACGGGTAGCCAACGGTATGTCTGTAGCGGTCCGCCACACCCAGCCGGCCACA  
GTCGATGAATCCAGAAAAGCGCCATTTTCCACCATGATATTCGGCAAGCAGGCATCGCCATGGGTACAGACAGATCCTCGCCGTCGGGCATC  
CGCGCTTGAGCCTGGCGAACAGTTCGGCTGGCGCGAGCCCTGATGCTCTTCGTCACAGATCATCCTGATCGACAAGACCGGCTTCCATCCGAG  
TAGTGTCTCGCTCGATGCGATGTTTCGCTTGGTGGTCAATGGGAGGTAGCCGGATCAAGCGTATGCGAGCCGCCGATTGCATCAGCCATGAT  
GGATACTTCTCGCAGGAGCAAGGTGAGATGACAGGAGATCCTGCCCGGCACTTCGCCCAATAGCAGCCAGTCCCTTCCCGCTCAGTGACA  
ACGTCGAGCACAGCTGCGCAAGGAACGCCCGTCTGGCCAGCCACGATAGCCCGCTGCTCTGTTGAGTTCATTCAGGGCACCGGCAGGT  
CGTCTTGACAAAAAGAACCGGGCGCCCTGCGCTGACAGCCGGAACACGGCGGCATCAGAGCAGCCGATTGTCTGTTGTGCCAGTCATAGCC  
GAATAGCTCTCCACCAAGCGGGGAGAACCTGCGTGAATCCATCTTGTTCATCATGCGAAACGATCCTCATCCTGTCTTGTATCAGAT  
CTTGATCCCTGCGCCATCAGATCCTTGGCGGCAAGAAAGCCATCCAGTTTACTTTTCAGGGGCTTCCCAACCTTACAGAGGGCGCCCGCAGCTG  
GCAATCCGGTTCGTTGCTGTCATAAAACCGCCAGTCTAGCTATCGCCATGTAGCCCACTGAAGCCACTGCAAGCTACCTGTTTCTTGGCGTGC  
GTTTTTCCCTTGTCCAGATAGCCAGTACGATTCACCCGGGAAAAAACCCTGACAGGGCGGGTTTTTTTTTTCAGATAAAAA  
AATCCTTAGCTTTCGCTAAGGATGATTTTTCGCAATTTGGCGCCGCTTCTAGAATGCACTAGTAGCGCCGCTGCGTCCGGCAAAAAACGGGC  
AAGGTGTACCACCTGCGCTTTTTTCTTTAAAAACCGAAAGATTACTTCCGCTTGAGAGCGTTCACCGCAAAACAACAGATAAAACGAAAGGC  
CCAGTCTTTCGACTGACCTTTCGTTTTATTGATGCTGGTACCGGGTGAATCGTGGAGCGAAGTGGTGAGAACCATAAAATCTTGGGG  
AACAGGGGAATGTTAATGAACACATGACATGCATAGGATAGCGAATTGATTTAAAGCAATGATTCGCCCTGAGATAAAATATTTTACCCACT  
GCTCCGCTAATTTTGGCGCTAATCTGGGCAAAAATTCGTTGGTTTTTCGAAAGGTGAACCCGCTAGCTAGCTTGTATTGCCAAACCTAACTCA  
TCATTGCTCCATGGCGGCCAAAAATCTTTAGGACAAAACTCGCCAGAGGTCAAGGCTTGAATTTTTCAGAGGGAAAAATTCCTCGCTAAATAA  
TCAAAAAGTTGAAAAAAAAGTTTTTCAGCTAAGGTTTGTATGTTATTTTATCTATGTAGACTTTTAAAAAAAACAAGTCCCGCAATCAAG  
CATCATTCACGGGAAAAATAATCTATGCAAAACGCCCTCGCCAGCACTAACCGCAAAAGCATTACTCAATAAAGTTAAAGAACTATCCCATCT  
GCCCGCTCGAAGAACGGCAAAAGCCTGTGGTTACTACTCGACCATATGGGAGAGCTCCCAACCGCTGGATGCATAGCTTGTAGTATTCTATAGT  
GTCACCTAAATAGCTTGGCGTAAATCATGGTCATAGCTGTTTCTGTTGTAATGTTATCCGCTCACAATTCACACAACATACGAGCCGGGAG  
CATAAAGTGTAAAGCCTGGGGTGCCTAATGAGTGAGCTAATCAATTAATGCTTGGCTGCTACTGCCCGCTTCCAGTCCGGAAACCTGTCTG  
TGCCAGCTGCATTAATGAATCGGCAACCGCGGGGAGGCGGTTTTGCGTATTTGGCGCTTCTCCGCTTCCCTGCTCAGTACTGCTGCTGCT  
CGGTGTTCCGCTGCGCGAGCGGTATCAGCTCACTCAAAGCGGTAATACGGTTATCCACAGAATCAGGGGATAACCGAGGAAAGAACATGTG  
AGCAAAAGGCCAGCAAAAGGCCAGGAACCTGAAAAGGCCGCGTGTGCTGGCGTTTTTCCATAGGCTCCGCCCCCTGACGAGCATCACAAAAA  
CGACGCTCAAGTCAGAGGTGGCGAAACCCGACAGGACTATAAAGATACCAGGCTTTCCCGCTGGAAGCTCCCTCGTGCCTCTCTGTCCGA  
CCCTCCCGCTTACCGGATACCTGCTTCCCTTCTCCCTTCCGCGGAGGCGGTTTTGCGTATAGCTCAGCTCAGCTCAGTATCTCAGTATCTGCTA  
GGTCTGTTCCGCTCAAGCTGGGCTGTGTGCACGAACCCCGCTTCCAGCCGACCGCTGCGCCTTATCCGGTAACTATCGCTTGTAGTCCAAACCG  
GTAAGACAGACTTATCGCCACTGGCAGGACCTGTTAACAGGATTAGCAGAGCGAGGTATGTAGGCGGTGCTACAGAGTCTTGAAGTGGT  
GGCCTAACACGGCTACTAGAGAAGCAGTATTTGGTATCTGCGCTCTGCTGAAGCCAGTTACCTTCGGAAAAAGAGTTGGTAGCTCTTGTATC  
CGCAAAACAAACCCGCTGGTAGCCGTTGTTTTTGTGTTGCAAGCAGCAGATTACCGCGCAGAAAAAAGGATCTCAAGAAGATCTTGGATC  
TTTTTACGGGCTGACGCTCAGTGGAAACGAAAACCTCACGTTAAGGGATTTTGGTCAATGAGATTATCAAAAAGGATCTTCACTTAGATCCTTT  
TAAATTAATAAATGAAGTTTTAAATCAATCTAAAGTATATATGAGTAAACTTGGTCTGACAGTTACCAATGCTTAATCAGTGAAGCACCTATCTC  
AGCGATCTGTCTATTTCTGTTCCATCAGTGTGCTGACTCCCGCTGCTGATAGATAACTACGATACGGGAGGGCTTACCATCTGGCCCCAGTGT  
GCAATGATACCGCGAGAACCCAGCTCCAGATTTATCAGCAATAAACCCAGCCAGCCGGAAGGGCCAGCGGAAAGGGCCAGGCTGCTGCTGCA  
CTTTATCCGCTCCATCCAGTCTATTAATGTTGCGGGAAAGCTAGAGTAAGTAGTTCGCCAGTTAATAGTTTGGCAACGTTGTTGCCATTGC  
TACAGGCATCGTGGTGTACGCTCGTCTGTTGGTATGGCTTCATTCAGCTCCCGTTCCCAACGATCAAGGCGAGTACATGATCCCCCATGTTG  
TGCAAAAAGCGGTTAGCTCCTTCGGTCTCCGATCGTTGTGCAAGTAAGTTGGCCGAGTGTATCACTCATGGTTATGGCAGCACTGCATA  
ATTCTCTTACTGTATGCCATCCGTAAGATGCTTTCTGTGACTGGTGTGACTCAACCAAGTCAATCTGAGAATAGTGTATGCGCGCAGCCGAG  
TTGCTCTTGGCCGCGCTCAATACGGGATAAATCCGCGCCACATAGCAGAACTTTAAAAGTGTCTCATCATTGGAAAACGTTCTTCGGGGGCAAAA  
CTCTCAAGGATCTTACCGCTGTTGAGATCCAGTTCGATGTAACCCACTCGTGCACCCAACTGATCTTCAGCATCTTTACTTTACCAGCGTTTT  
CTGGGTGAGCAAAAACAGGAAGGCAAAATGCCGCAAAAAGGGAAATAAGGGCGACCGGAAATGTTGAATACTCATACTTCTCTTTTCAATA  
TTATTGAAGCATTATCAGGGTTATTGCTCATGAGCGGATACATATTTGAATGATTTAGAAAAATAAAACAAATAGGGGTTCCCGGCACATTT  
CCCCGAAAAGTGCCACCTGATGCGGTGTGAAATACCGCACAGATGCGTAAGGAGAAAATACCGCATCAGGAAATTTGAAGCGTTAATATTTGT  
TAAATTCGCGTTAAATTTTGTAAATCAGCTCATTTTTTAACCAATAGGCCGAAATCGGCAAAATCCCTTATAAATCAAAAGAAATAGACCGA  
GATAGGGTTGAGTGTGTTCCAGTTTGGAAACAAGAGTCCACTATTAAGAACGTGGACTCCAACGTCAAAGGGCGAAAAACCGTCTATCAGGGC  
GATGGCCACTACGTGAACCATACCCTAATCAAGTTTTTTGGGGTCAAGGTGCGTAAAGCACTAAATCGGAACCCATAAAGGGAGCCCGGAT  
TTAGAGCTTGACGGGAAAGCCGGCAAGCTGGCGAGAAAGGAAGGAAAGCAAGGAGCGGGCGCTAGGGCGCTGGCAAGTGTAGCGGT  
CACGCTGCGCGTAACCACCA

**Supplementary Figure S16.** Plasmid pSN16KS. The plasmid map with the main features highlighted is depicted in **A** and the FASTA formatted sequence in **B**. N16.3 – 3’ homologous region for site N16; N16.5 – 5’ homologous region for site N16; TT – double transcriptional terminators; Amp<sup>R</sup> – gene encoding the protein responsible for ampicillin resistance; Km<sup>R</sup> – gene encoding the protein responsible for neomycin/kanamycin resistance; *sacB* – gene encoding the protein responsible for sucrose sensitivity.



**A**

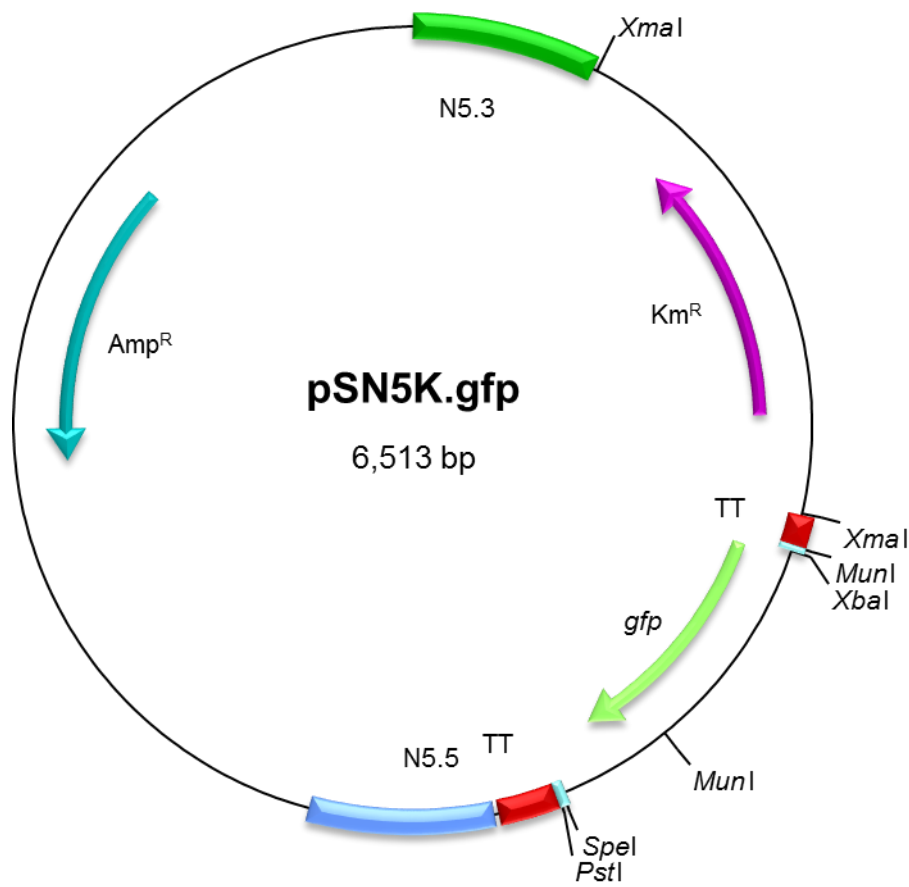

**B**

>pSN5K.gfp

```
TGTCAAATCAGCATTGCTCTGCCAGGTGAGACGGAGTTTTTGTCCACTAATCCCTGTTGGATAGAAGGCGCTTGATACAGTTCCAACCAAC  
CCAATCTCCTGTCTGGCTTTAGTTTCTCCACCGTCGGCAGGATTAACGACCCAACCACTCTCCCAAAGGCCGATAATACGCCTCATCTAAA  
TTCTGTTGCAGAGATAATAATCTACCTGGTTGGCGGGCACTGACTGCTAATTTGATAATCCGGGATGCGGCCAGAGGTTTCTGAGGTTGAA  
ACAGCGTAGCTAGGGAAATCACCACCAGAGCGGCGATCGCCACCAATACCATCCGCCAGCGCCATTGCTTCATCTGTGGACTGCCCTAAAAAT  
GCCATAAAAAACACCTGGGGCGTCTTTCCCTGTTTCGACTCCAGATGTTTTTCTAATTTCCACACCTGTCTTAAGTATAATCACCACCG  
GGATTGTCAAGGCTTCAGGATTACACCCGGGCGATTTACTTTTCGACCTCATTCTATTAGACTCTCGTTTGGATTGCAACTGGTCTATTTTCT  
CTTTTGTGTTGATAGAAAATCATAAAAGGATTTGCAGACTACGGGCTAAAGAACTAAAAATCTATCTGTTTCTTTTCATCTCTGTATTTTT  
ATAGTTTCTGTTGCATGGGCATAAAGTTGCCTTTTTAATCACAATTCAGAAAATATCATAATATCTCATTTCACATAAATAAGTGAACGGCAG  
GTATATGTGATGGGTTAAAAAGGATCGATCCTCTAGCGAACCCAGAGTCCCGCTCAGAAGAATCGTCAAGAAGGCGATAGAAGGCGATGCGC  
TGCGAATCGGAGCGCGGATACCGTAAAGCACGGAAGCGGTCAGCCCATTCGCGCCAAAGCTCTTCAGCAATAACACGGGTAGCCAACGCTA  
TGCTCTGATAGCGGTCGCCACACCCAGCCGCCACAGTCGATGAATCCAGAAAAGCGGCCATTTTCCACCATGATATTCGGCAAGCAGGCATC  
GCCATGGGTCACGACGAGATCCTCGCCGTCGGGCATCCGCGCCTTGAGCCTGGCGAACAGTTCCGGCTGGCGCGAGCCCTGATGCTCTCGTCC  
AGATCATCTGATCGACAAGACCGGCTTCCATCCGAGTACGTGCTCGCTCGATGCGATGTTTCGCTTGGTGGTTCGAATGGGCAGGTAGCCGGAT  
CAAGCGATGCGACCCGCCGATTCGATCAGCCATGATGGATACTTTCTCGGCAGGAGCAAGGTGAGATGACAGGAGATCCTCCCGCCACTTC  
GCCAATAGCAGCCAGTCCCTTCCCGCTTCAGTGACAACGTCGAGCACAGCTGCGCAAGGAACGCCCGCTCGTGGCCAGCCAGATAGCCGCGCT  
GCCTCGTCTGGAGTTCATTCAGGGCACCGGACAGGTCCGGTCTTGACAAAAAGAACCGGGCGCCCTGCGCTGACAGCCGGAACAGCGCGCAT  
CAGAGCAGCCGATTGCTGTTGTGCCAGTCATAGCCGAATAGCCTTCCACCAAGCGGCGGAGAACCTGCGTGAATCCATCTTGTTCAT  
CATGCGAAACGATCCTCATCTGCTCTTGATCAGATCTTGATCCCTGCGCCATCAGATCCTTGGCGGCAAGAAAGCCATCCAGTTACTTTG  
CAGGGCTTCCAACCTTACCAGAGGGCGCCCGCTGGCAATCCGGTTCGCTTGTCTGTCATAAAACCGCCAGTCTAGCTATCGCCATGTAA  
GCCACTGCAAGCTACCTGCTTTCTTTGCGCTTGCGTTTTCCCTTGTCAGATAGCCAGTAGCTGACATTCACCCGGGAAAAAAAACCC  
GCCCTGACAGGGCGGGGTTTTTTTTTTCAGATAAAAAAATCCTTAGCTTTCGCTAAGGATGATTTCTGCAATTTGGCGGCCGCTTCTAGAGTCAC  
ACAGAAAGTACTAGATGCGTAAAGGAGAAGAATTTTACTGGAGTTCCCAATTTCTTGTGAATTAGATGGTATGTAATGGGCACAAAT  
TTTTCTGTCAGTGGAGAGGTTGAAGGTGATGCAACATACGAAAATTTACCCTTAAATTTATTTGCACTACTGGAAAATCTACCTGTTCCATGGCC  
AACACTTGTCACTACTTTTCGGTTATGGTGTTCATGCTTTGCGAGATACCCAGATCATATGAAACAGCATGACTTTTTCAAGAGTGCCATGCC  
GAAGGTTATGTACAGGAAGAATATATTTTTCAAAGATGACGGGAACACTACAAGACCGTCTGAAGTCAAGTTTGAAGGTGATACCTTTGTTA  
ATAGAATCGAGTTAAAAGTATTGATTTTAAAGAGATGGAAACATTTCTGGACACAAATGGAATACAACATAACTCACACAATGTATACAT  
CATGGCAGACAAACAAAAGATGGAATCAAAGTTAACTTCAAATTTAGACACAACATTGAAGATGGAAGCGTTCACTAGCAGACCATTATCAA  
CAAATACTCCAATTTGGCGATGGCCCTGTCTTTTACCAGACAACCATTACCTGTCCACACAATTCGCCCTTTCGAAAGATCCCAACGAAAAGA  
GAGACCACATGGTCTTCTTGTAGTTTGTAAACAGCTGCTGGGATTACACATGGCATGGATGAACATAACAATAATAACTAGAGCCAGGCATC  
AAATAAAACGAAAGGCTCAGTCGAAAGACTGGGCTTTTCGTTTTATCTGTTGTTTGTGCGTGAACGCTCTCTACTAGAGTCACACTGGCTCAC  
TTCGGGTGGGCTTTCTGCGTTTATATACTAGAATGCACTAGTAGCGGCCGCTGCAGTCCGGCAAAAAACGGGCAAGGTGTACCACCTGCC  
CTTTTTCTTAAAACCGAAAAGATTACTTCGCGTTGGAGAGCGTTCACCGACAACAACAGATAAAACGAAAGGCCAGTCTTTCGACTGAGCC
```

```
TTTCGTTTTATTTGATGCCTGGTACCGGGTGTAAATCGGTTGATTATTTTCAGTGGCCCGCGATGGATAATTACCATGGCCCGACCGACCGGGA
TTTCCAGACCAGTTTGAACAGTATTAATAATAGCCTTTCCGGACAAGGCCCTCTGTGAAAATCTTAAAAAGTATTAAGATTTTAAAAGCTAGCTT
ATTTTCGGAGGAAATGTGTTACTCGACTTGCCAGCAACACCGGATTTGCGTGAAGGATTTAGTCATGAGCTTGAGGGCTTTGGCCACTGTGC
TCGAAAAATCGGGGCTACATTTGCTTCTTGCTACACCTGTGGCGACCAACTCAACAGCGCCTCCTTCATGGTGAGCTTGGGGGAAAAATCATCTGAT
CCGCTTTTGGTATCGGACTACGGCATCAGCTGGACAGAAATGCGGGATGACCGAGAATTAATGAAATTAGAAGGAGCCGAGGCGATCGCCAG
TTGGAAGAATTTGGCAATGTGGTCAAATATGCTAGCAGATGCCCCACTCGACCATATGGGAGAGCTCCCAACCGGTTGGATGCATAGCTTG
AGTATTCATAGTGTACCTAAATAGCTTGGCGTAATCATGGTCAATAGCTGTTTCCCTGTGTGAAATGTTATCCGCTCACAATTCACACAACA
TACGAGCCGGAAGCATAAAGTGTAAAGCCTGGGGTGCCTAATGAGTGAGTAACTCACATTAATTGCGTTGCGCTCACTGCCCGCTTTCCAGTC
GGAAACCTGTCTGCGCAGCTGCATTAATGAATCGGCCAACGCGGGGGAGAGGGGTTTGCCTATTGGGCGCTCTCCGCTTCCTCGCTCACT
GACTCGCTGCGCTCGGTCGTTCCGCTGCGGCGAGCGGTATCAGCTCACTCAAAGCGGTAATACGGTTATCCACAGAATCAGGGGATAACGCAG
GAAAGAACATGTGAGCAAAAGGCCAGCAAAAGGCCAGGAACCGTAAAAAGGCCCGGTTGCTGGCGTTTTTCCATAGGCTCCGCCCCCTGACGA
GCATCACAAAAATCGACGCTCAAGTCAGAGGTGGCGAAACCCGACAGGACTATAAAGATACCAGCGTTTTCCCTGGAAGCTCCCTCGTGCGC
TCTCTGTTCGACCCCTGCGCTTACCGGATACCTGTCCGCTTTCTCCCTTCGGGAAGGTTGGCGCTTTCTCATAGCTCAGCTGTAGGTATC
TCAGTTCGGTGTAGGTCGTTCCGCTCCAAGCTGGGCTGTGTGCACGAACCCCCGTTTCAGCCCGACCGCTGCGCCTTATCCGGTAACTATCGTCT
TGAGTCCAACCCGGTAAGCACGACTTATCGCCACTGGCAGCAGCCACTGGTAACAGGATAGCAGAGCGGATAGTAGGCGGTCTACGAG
TTCTTGAAGTGGTGGCTAACTACCGCTACACTAGAAGAACAGTATTTGGTATCTGCGCTCTGCTGAAGCCAGTTACCTTCGGAAAAAGAGTTG
GTAGCTCTTGATCGGCAACAAACACCGCTGTAGCGGTGGTTTTTTTTGTTTGAAGCAGCAGATTACGCGCAGAAAAAAGGATCTCAAGA
AGATCCTTTGATCTTTTCTACGGGGTCTGACGCTCAGTGGAACGAAAACTCACGTTAAGGGATTTTGGTTCATGAGATTATCAAAAAGGATCTTC
ACCTAGATCCTTTTAAATAAAAATGAAGTTTTAAATCAATCTAAAGTATATATGAGTAACTTTGGTCTGACAGTTACCAATGCTTAATCAGTG
AGGCACCTATCTCAGCGATCTGTCTATTTTCGTTTACCTCCATAATGTTCCGCTCCCGCTCGTGTAGATAAATGAGTACGGGAGGCTTACCATC
TGGCCCCAGTGTGCAATGATACCGCGAGACCCAGCTCACCGGCTCCAGATTTATCAGCAATAAACAGCCAGCCGGAAGGGCCGAGCGCAGA
AGTGGTCTGCACTTTTATCCGCTCCATCCAGTCTATTAATTTGTTGCCGGGAAGCTAGAGTAAGTAGTTCCGCGTAAATAGTTTGGCGAACG
TTGTTGCCATTGCTACAGGCATCGTGGTGTACGCTCGTCTGTTGGTATGGCTTCATTCAGCTCCGGTTCCTCAACGATCAAGGCGAGTTACATG
ATCCCCATGTTTGGCAAAAAAGCGGTTAGCTCCTTCGCTCCGATCGTGTGTGAGAAAGTAAAGTGGCCCGAGTGTATCACTCATGGTTATG
GCAGCACTGCATAATCTCTTACTGTATGCCATCCGTAAGATGCTTTTCTGTGACTGGTGAAGTACTCAACCAAGTCAATCTGAGAAATAGTGTA
TGGGGCGACCGAGTTGCTCTTGGCCGGGCTCAATACGGGATAATACCGGCCACATAGCAGAACTTTAAAGTGCATCATTTGGAAAAAGCTTC
TTCCGGGGCAAAACTCTCAAGGATCTTACCGCTGTTGAGATCCAGTTCGATGTAACCCACTCGTGCACCCAACTGATCTTCAGCATCTTTTACT
TTCACCAGCTTTTCTGGGTGAGCAAAAAACAGGAAGGCAAAATGCCGCAAAAAAGGGAATTAAGGGCGACACGGAAATGTTGAATACTCATACTCT
TCCTTTTTCAATATTTATGAAGCAATTTATCAGGGTTATTTGCTCATGAGCGGATACATATTTGAATGTATTTAGAAAAATAAACAAATAGGGGT
TCCGCGCACATTTCCCGAAAAAGTGCCACCTGATGCGGTTGAAATACCGCACAGATGCGTAAGGAGAAAAATACCGCATCAGGAAATTTGTAAGC
GTTAATATTTTGTAAAAATTCGCGTTAAATTTTTGTTAAATCAGCTCATTTTTTAACCAATAGGCCGAAATCGGCAAAATCCCTTATAAATCAA
AAGAATAGACCGAGATAGGGTTGAGTGTGTTTCCAGTTTGAACAAGAGTCCACTATTAAGAAGCTGGACTCCAACGTCAAAGGGCGAAAAAC
CGTCTATCAGGGCGATGGCCACTACGTGAACCATCACCTAATCAAGTTTTTTGGGGTCCGAGGTGCCGTAAGCACTAAATCGGAACCCATAA
GGGAGCCCCGATTTAGAGCTTGACGGGGAAAGCCGGCAACGTGGCGAGAAAGGAAGGAAGCAAGGAGCGGGCGCTAGGGCGCTGG
CAAGTGTAGCGGTCACGCTGCGGTAACCACCACCCCGCGCTTAATGCGCGCTACAGGGCGCGTCCATTCGCCATTCAGGCTGCGCAAC
TGTTGGGAAGGGGATCGGTGCGGGCCTCTTCGCTATTACGCCAGTGGCGAAAGGGGGATGTGCTGCAAGGCGATTAAGTTGGGTAACGCCAG
GGTTTTCCAGTACGACGTTGTAACAGCGCCAGTGAATTTGAATACGACTACTATAGGGCAATTTGGGCCGACGTCGATGCTCCCGG
CCGCATGGCGGCCGCGGAATTCGAT
```

**Supplementary Figure S17.** Plasmid pSN5K.gfp. The plasmid map with the main features highlighted is depicted in **A** and the FASTA formatted sequence in **B**. N5.3 – 3’ homologous region for site N5; N5.5 – 5’ homologous region for site N5; TT – double transcriptional terminators; Amp<sup>R</sup> – gene encoding the protein responsible for ampicillin resistance; Km<sup>R</sup> – gene encoding the protein responsible for neomycin/kanamycin resistance; *gfp* – sequence encoding the reporter GFP.

A

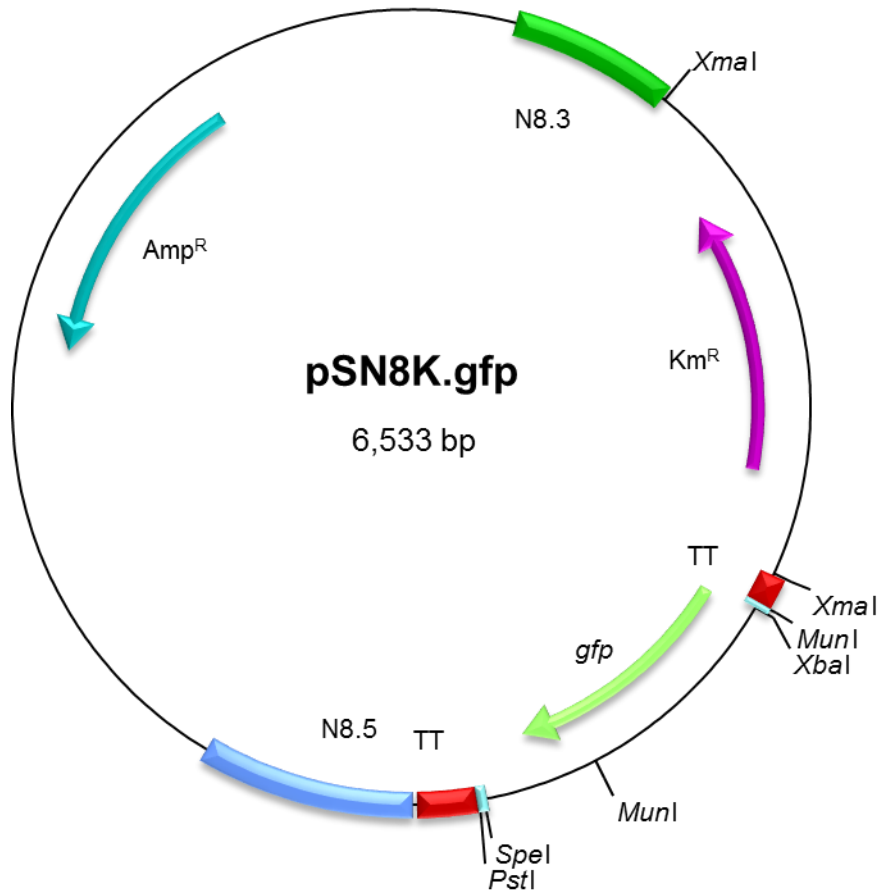

B

>pSN8K.gfp  
CACCCGCCGCGCTTAATGCGCCGCTACAGGGCGCGTCCATTGCCATTCCAGGCTGCGCAACTGTTGGGAAGGGCGATCGGTGCGGGCCTCTTCG  
CTATTACGCCAGCTGGCGAAAGGGGATGTGCTGCAAGGCGATTAAAGTTGGGTAACGCCAGGGTTTCCAGTCACGACGTTGTAAAACGACGG  
CCAGTGAATTGTAATACGACTCACTATAGGGCGAATTGGGCCCGACGTCGCATGCTCCCGGCCGATGGCGGCCGCGGGAATTCGATTGATGA  
CCGCTGGCGGAGTTTAGTCCAGGGTTATTGTACCGTCAAGGTTACATTGCCACCCAGATTTAACTACGCTGCGAGTCCGTACCATTGGCGAT  
CGGCCTATCTCACCATTAAAGGTAATAATGCCAGCATTGCCCGCTTGGATTGAGTATGAAATCTTGCAGTGGGAAGCCAATTAATATTTGAC  
AGAACTCTGTTACCGCCCTGATTGAAAATATCGTTATGCTCGATTACCATTGGTAAACCTGAGAAGTAGACGAGTTTTTGGGGGATAACC  
AGGGTCTAATTTTAGCGGAAGTGAATTAACCTACACTGGTGAATAAAGTCTACTTCCCTGGATCGGGGAAGAGGTAACGGATGATGCCCG  
CTATTACAACGCTCAATTTAGCCCAACATCCCTACAAAAATTTGGTACAAAGATTACACCCGGGCGATTTACTTTTCGACCTCATTCTATTAGACT  
CTCGTTTGGATTGCAACTGGTCTATTTTCTCTTTTGTGTTGATAGAAAATCATAAAAGGATTTGCGAGCTACGGGCCATAAAGAACTAAAAATC  
TATCTGTTTCTTTTTCATTCTCTGATTTTTTATAGTTTCTGTTGCATGGGCATAAAGTTGCCTTTTAAATCACAATTCAGAAAATATCATAATA  
TCTCATTTCACATAAATAAGTGAACGGCAGGTATATGTGATGGGTTAAAAAGGATCGATCCTCTAGCGAACCCAGAGTCCCGCTCAGAAGAA  
CTCGTCAAGAAGGGGATAGAAGGGGATGCGCTGCGAATCGGGAGCGGCGATACCGTAAAGCACGAGGAAGCGGTCAGCCATTTCGCCGCCAAGC  
TCTTCAGCAATATCACGGGTAGCCAACGCTATGTCTGTAGCGGTCCGCCACACCCAGCCGGCCACAGTCGATGAATCCAGAAAAGCGGCCAT  
TTTCCACCATGATATTCGGCAAGCAGGCATCGCCATGGGTCACGACGAGATCCTCGCCGTCGGGCATCCGCGCTTGCAGTGGCAACAGGTTT  
GGCTGGCGCGAGCCCTGATGCTCTTCGTCCAGATCATCTGTGACAAAGACCGGCTTCCATCCGAGTACGTGCTCGCTCGATGCGATGTTT  
GCTTGGTGGTCAATGGGCAGGTAGCCGATCAAGCGTATGCAGCCGCCGATTCGATCAGCCATGATGGATACTTCTCGCAGGAGCAAGGT  
GAGATGACAGGAGATCCTGCCCGGCACTTCGCCCAATAGCAGCCAGTCCCTTCCCGCTTCAGTGACAACGTCGACACAGCTGCCCAAGGAAC  
GCCCGTCTGGCCAGCCAGATAGCCGCGCTGCCTCTGAGTTTCAATTCAGGACCCGGACAGGTCGGTCTTGACAAAAGAAACCGGGCGC  
CCCTGCGCTGACAGCCGGAAACCGCGGCATCAGAGCAGCCGATTTGCTGTTGTGCCAGTCATAGCCGAATAGCCTCTCCACCAAGCGGCG  
GAGAACCTGCGTGAATCCATCTTGTTCATCATGCGAAACGATCCTCATCTGTCTCTTGTATCAGATCTTGATCCCTGCGCCATCAGATCCT  
TGGCGGCAAGAAAGCCATCCAGTTTACTTTGCAAGGCTTCCCAACCTTACAGAGGGCGCCCGAGCTGGCAATTCGGTTTCGCTTCTGCTCCAT  
AAAACGCCAGTATAGCTATCGCCATGTAAGCCACTGCAAGTACCTGCTTTCTTTGCGCTTGCCTTTTCCCTTGTCCAGTACCCAGT  
AGCTGACATTTACCCGGGAAAAAACCAGCCCTGACAGGGCGGGGTTTTTTTTTCAGATAAAAAAATCCTTAGCTTTCGCTAAGGATGAT  
TTCTGCAATTTGGCGCCGCTTCTAGAGTACACAGGAAAGTACTAGATGCGTAAAGGAGAAGAACTTTTCACTGGAGTTGTCCTAATCTTGT  
GAATTAGATGGTGTATGTTAATGGGCACAAATTTCTGTGATGGAGAGGGTGAAGGTGATGCAACATACGGAAAACCTTACCTTAAATTTTAT  
GCACTACTGGAAGAACTACCTGTTCATGGCCAACTTGTCTACTTTTCGGTTATGGTGTTCATGCTTTGCGAGATACCCAGATCATATGAA  
ACAGCATGCTTTTTCAAGAGTGCATGCCCCAAGGTTATGTACAGGAAAGAACTATATTTTTCAAGATGACGGGAACCTACAAGACAGTGT  
GAAGTCAAGTTTGAAGGTGATACCTTGTTAATAGAATCGAGTTAAAAGTATTGATTTTTAAAGAAGATGGAACATCTTGGACACAAATTTG  
AATACAACATAACTCACCAATGTATACATCATGGCAGACAAACAAAAGAAATGGAATCAAAGTTAACTTCAAAATTAGACACAACATTTGAA  
TGGAAAGCGTTCACTAGCAGCAATTAACAACAAATCTCAATTTGGCGATGGCCCTGTCTTTTACCAGACAACCATTTACCTGTCCACACAA  
TCTGCCCTTTCGAAAGATCCCAACGAAAAGAGAGACCAATGGTCTTCTTGTAGTTTGTAAACAGCTGCTGGGATTACACATGGCATGGATGAAC  
TATACAAATAATAACTAGAGCCAGGCATCAAATAAACGAAAGGCTCAGTCGAAAGACTGGGCCTTTCGTTTTATCTGTTGTTGTCGGTGA

ACGCTCTCTACTAGAGTCACTGGCTCACCTTCGGGTGGGCCTTCTGCGTTTTATATACTAGAAATGCACTAGTAGCGGCCGCTGCAGTCCGGC  
AAAAAACCGGGCAAGGTGTCACCACCCTGCCCTTTTCTTTAAAAACCGAAAAAGATTACTTCGCGTTGGAGAGCGTTCACCACAAACAACAGAT  
AAAACGAAAGGCCAGTCTTTCGACTGAGCCTTTCGTTTTATTTGATGCCTGGTACCGGGTGTAATCCTTCAATCCCTATTGTTATTAATAGT  
GCTCTGAAACTAACAAATAAGCAAGATCAAATTTGGAAGAAAACGCAACAAAATGAACCATTAAGATAATTTCTGTCTATCTGGCTGGTATAT  
TCCAGTCTACTCAGAAATGAGTTTGTGTTTTATGACAAATCAGTATGTACCAAAATTAAGTTCGCGCAATCGATCCTGGTAACTCTATTTTGTGCTT  
ACCCCTGGGTATTGTGGCCATTATCAAAGCATCGGAAGTTAATTCCTGTTAGCTTCAGGGGACTATGAAGGCGTGTAAGGCTTCCAAGGAA  
GCGAAAAAGTTTTGTTGGTGGTCCCTTGGTGCCCGCATAATTTTCATTGCCATCTATTTTGTGCTAGTGGTTATTGCCCGCTCTTTGGTCAAGT  
AATTAAGTTACATTTTTTGACTTTGCCTTGTTCACCATTCAATTAACGAATACCATGTTTGTAGTTGAAAAATTAATCCCATCTCCATTACTAT  
CCGCTAAGGCCAAGGAATATTTAGTATTCACTTTGGTAACCCCTAACCATTTGTCGTTGCTGGCACTCGACCATATGGGAGAGCTCCCAACGGCTT  
GGATGCATAGCTTGAGTATTCTATAGTGTACCTAAATAGCTTGGCGTAATCATGGTTCATAGCTGTTTCCCTGTGTGAAATGTTATCCGCTCAC  
AATTCCACACAACATACGAGCCGGAAGCATAAAGTGTAAAGCCTGGGGTGCCTAATGAGTGAGCTAACTCACATTAATTGCGTTGCGCTCACTG  
CCCGCTTTCAGTTCGGAACCTGTCGTGCCAGTGCATTAATGAATCGGCCAACGCGGGGAGAGCGGTTTTGCGTATTGGGCGCTTCCG  
CTTCTCGCTCACTGACTCGCTGGCTCGTTCGGTTCGGTGCAGGCGGATCAGCTCACTCAAAGGGGTAATACGGTTATCCACAGAAATC  
AGGGGATAACGCAGGAAAGAACATGTGAGCAAAAGGCCAGCAAAAGGCCAGGAACCGTAAAAAGGCCGCTTGTGGCGTTTTTCCATAGGCTC  
AGGCCCTGACGAGCATCACAAAAATCGACGCTCAAGTCAAGTGGCGAAACCGCAGGACTATAAGAGATACAGGCTTTCCCTCCCTGGAA  
GCTCCCTCGTGGCTCTCTGTTCCGACCTGCCGCTTACCTGATACCTGCTCCGCTTTTCTCCCTTCGGGAAGCGTGGCGTTTTCTCATAGTAC  
ACGCTGTAGGTATCTCAGTTCGGTGTAGTTCGTTCCGCTCCAGCTGGGCTGTGTGCACGAACCCCGCTTCCGCGACCGCTGCGCTTATCC  
GGTAACTATCGTCTTGAGTCCAACCCGGTAAGACACGACTTATCGCCACTGGCAGCAGCCACTGGTAAACAGGATTAGCAGAGCGAGGTATGTAG  
GCGGTGTACAGAGTCTTGAAGTGGTGGCCTAACTACGGCTACACTAGAAGAACAGTATTGGTATCTGCGCTCTGTGAAGCCAGTTACCTT  
CGGAAAAAGAGTTGGTAGCTCTTGTATCCGCAAAACAAACCCCGTGGTAGCGGTTTTTTTTGTTTGAAGCAGCAGATTACGGCAGAAAA  
AAAGGATCTCAAGAAGATCCTTTGATCTTTTCTACGGGCTGTGACGCTCAGTGGAAACGAAACTCACGTTAAGGGATTTTGGTATGAGATTAT  
CAAAAAGGATCTTCACTAGATCCTTTTAAATTAATAAATGAAGTTTTAAATCAATCTAAAGTATATATGAGTAAACTTGGTCTGACAGTTACCA  
ATGCTTAATCAGTGAGGCACCTATCTCAGCGATCTGTCTATTTGCTTCAATCCATAGTTGCCTGACTCCCGCTCGTGTAGATAACTACGATACGG  
GAGGCTTACCATCTGGCCAGTGTGCAATGATACCGCGAGACCCACGCTCACCGGCTCCAGATTTATCAGCAATAAACCCAGCCAGCCGAA  
GGCCGAGCGCAGAAGTGGTCTGCAACTTTATCCGCTCCATCCAGTCTATTAATTGTTGCCGGAAGCTAGAGTAAGTAGTTCGCCAGTTAA  
TAGTTTGGCAACGTTGTTGCCATTGCTACAGGCATCGTGGTGTACGCTCGTCTGTTGGTATGGCTTCAATTCAGCTCCGCTTCCCAACGATCA  
AGGCGAGTTACATGATCCCCATGTTGTGCAAAAAAGCGGTTAGCTCCTTCGGTCCCGATCGTTGTGCAAGTAAGTTGGCCGAGTGTAT  
CACTCATGGTTATGGCAGCACTGCATAAATCTCTTACTGTCAATGCCATCCGTAAGATGCTTTTCTGTGACTGGTGGTACTCAACCAAGTCATT  
CTGAGAATAGTGTATGCGGCGACCGAGTTGCTCTTGCCTGGCGCTCAATACGGGATAATACCGGCCACATAGCAGAACTTTAAAAGTGTCTATC  
ATTGGAACCGTTCTTCCGGGCGAAAACTCTCAAGGATCTTACCCTGTTGAGATCCAGTTCGATGTAACCCACTCGTGCACCCAACTGATCTT  
CAGCATCTTTTACTTTACCAGCGTTTCTGGGTGAGCAAAAACAGGAAGGCAAAATGCCGCAAAAAGGGAATAAGGGCGACACGGAAATGTTG  
AATACTCACTCTCTCTTTTCAATATTATGAAGCAATTTATCAGGGTATTGTTCTCATGAGCGGATACATATTGAATGATTATGAAAAAT  
AAACAAATAGGGGTTCCGCGCACATTTCCCGAAAAAGTGCACCTGATGCGGTGTGAAATACCGCACAGATGCGTAAAGGAAAAATACCGCATC  
AGGAAATTGTAAGCGTTAATATTTGTTAAAAATTCGCGTTAAATTTTTGTTAAATCAGCTCATTTTTTAAACCAATAGGCCGAAATCGGCAAAAT  
CCCTTATAAATCAAAGAATAGACCGAGATAGGGTTGAGTGTGTTCCAGTTTGGAAACAAGATCCACTATTAAGAACGTGGACTCCAACGTC  
AAAGGGCGAAAAACCGTCTATCAGGGCGATGGCCCACTACGTGAACCATCACCCATCAAGTTTTTTGGGGTCGAGGTGCGTAAAGCACTAA  
ATCGGAACCCATAAGGGAGCCCGGATTTAGAGCTTGACGGGAAAGCCGGCAACGTGGCGAGAAAGGAAGGAAAGCAAGGAGGAGCGG  
CGCTAGGGCGCTGGCAAGTGTAGCGGTACGCTGCGCGTAACCA

**Supplementary Figure S18.** Plasmid pSN8K.gfp. The plasmid map with the main features highlighted is depicted in **A** and the FASTA formatted sequence in **B**. N8.3 – 3’ homologous region for site N8; N8.5 – 5’ homologous region for site N8; TT – double transcriptional terminators; Amp<sup>R</sup> – gene encoding the protein responsible for ampicillin resistance; Km<sup>R</sup> – gene encoding the protein responsible for neomycin/kanamycin resistance; *gfp* – sequence encoding the reporter GFP.

**A**

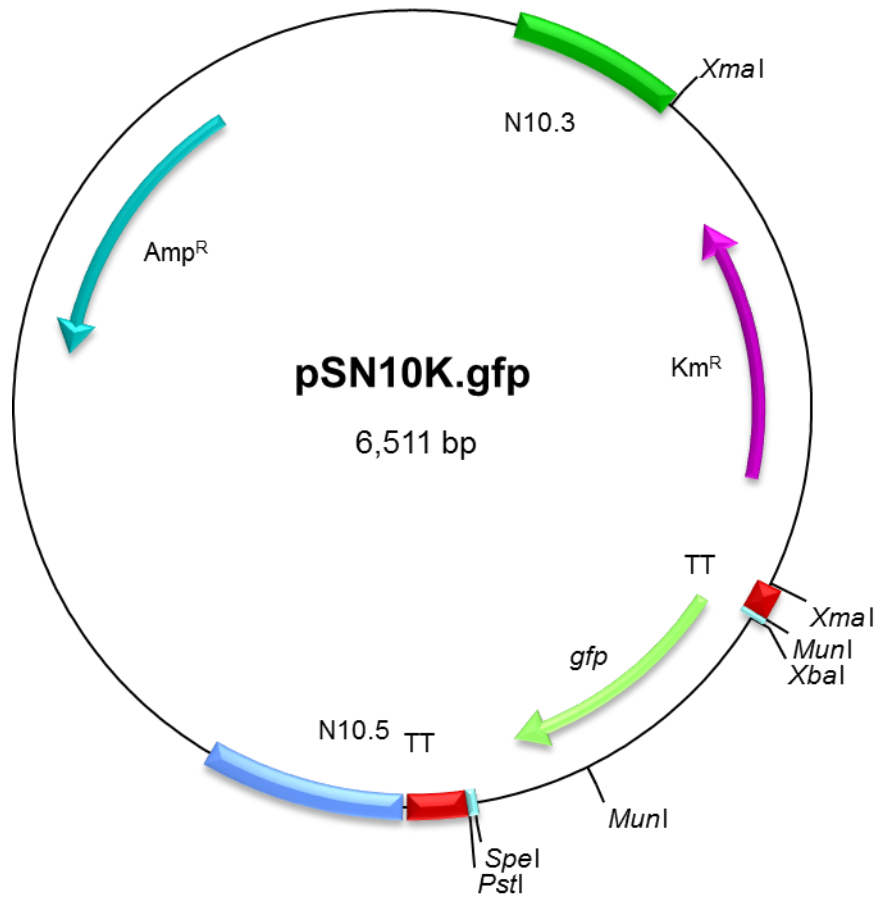

**B**

```

>pSN10K.gfp
CACCCGCCGCGCTTAATGCGCCGTACAGGGCGCGTCCATTCGCCATTAGGCTGCGCAACTGTTGGGAAGGGCGATCGGTGCGGGCCTCTTCG
CTATTACGCCAGCTGGCGAAAGGGGATGTGCTGCAAGGCGATTAAGTTGGGTAACGCCAGGGTTTCCAGTCAGACGTTGTAAACGACGG
CCAGTGAATTGTAATACGACTCACTATAGGGCGAATTGGGCCGACGTCGCATGCTCCCGCCGCGCATGGCGGCCGCGGGAATTCGATTGGACT
GACCCAAGATACAGTGGTAGCTTCAAGTTCGTCAATCAACCCCAATGGAAAGCTGAGATAATCTGTTGTTGATGCGACCGTCTTCATTTAGCT
AAAAAGACAAGTCTGTGGCTAGTTACTATGACGAGGCCATCGGGTCTATCCAGCGGCTTGTCTGATTCCAAAACCTTGGCGATTTTCTGAAGTA
GTATCTTTTACCCTTAAGCCGCAAGGCTTTGGATGAGCTTGGTCGAATCATCTTTTATGATGCTCGACATCGCGAATAACTTTGTAACGAC
CTTCCCGAGCTTGAATGCAAAGTCGGTTAGATTATCCATCAGAGTTGAATGCCGATAATACAGACTGCTATACTATTTTAAATGAAAAGAGTGCT
GGCAAGCAAGCCCGCGAAGCTTGAAGCTGTGCAGCGCAACGAAGCGCATTGTAGTTTGCCTCGGATTACACCCGGGCGATTTACTTTTTCGA
CCTCATTCTATTAGACTCTCGTTTGGATTGCAACTGGTCTATTTTCTCTTTTGTGTTGATAGAAAATCATAAAAGGATTTGCAGACTACGGGCC
TAAAGAACTAAAAATCTATCTGTTTCTTTTCACTCTGTATTTTATAGTTTCTGTTGCATGGGCATAAAGTTGCCTTTTAAATCACAAAT
CAGAAAAATATCATAATATCTCATTTCACTAAAATAATAGTGAACGGCAGGTATATGTGATGGGTTAAAAAGGATCGATCCTTAGCGAACCCAG
AGTCCCGCTCAGAAGAACTCGTCAAGAAGGCGATAGAAGGCGATGCGCTCGGAATCGGGAGCGGCATACCGTAAAGCACGAGGAAGCGGTCAG
CCCATTCCCGCCCAAGCTCTTCAGCAATATCACGGGTAGCCAACGCTATGTCTGATAGCGGTCCGCCACACCCAGCCGCCACAGTCGATGAA
TCCAGAAAAGCGGCCATTTCCACCATGATATTCGGCAAGCAGGCATCGCCATGGGTCACGACGAGATCCTCGCCGTGGGCATCCCGCCTTG
AGCCTGGCGAACAGTTCCGCTGGCGCGAGCCCTGATGCTTTCGTCAGATCATCTGTATCGCAAGAACCGGCTTCCATCCGAGTACGCTGCTC
GCTCGATGCGATGTTTCGCTTGGTGGTTCGAATGGGCAGGTAGCCGGATCAAGCGTATGCAGCCGCGCATTGCATCAGCCATGATGGATACTTT
CTGGCAGGAGCAAGGTGAGATGACAGGAGATCCTGCCCGGCACTTCGCCCAATAGCAGCCAGTCCCTTCCCGCTTCACTGACAACTCGGAGC
ACAGCTGCGCAAGGAACCCCGTCTGGCCAGCCAGATAGCCGCGCTGCCTCGTCTTGGAGTTCATTAGGGCACCCGACAGGTCGGTCTTGA
CAAAAAGAACCCGGCGCCCTGCGCTGACAGCCGGAACACGGCCGATCAGAGCAGCCGATTTGCTGTTGTTGCCAGTCAAGCCGAATAGCCT
CTCCACCAAGCGCCGGAACCTGCGTGCAATCCATCTTGTTCATCATGCGAAACGATCCTCATCTGTCTCTTGTATGATCAGATCTTGATCCC
CTGCGCCATCAGATCCTTGGCGGAAGAAAGCCATCCAGTTTACTTTGCAAGGGCTTCCCAACCTTACCAGAGGGGCCCCAGCTGGCAATTCGG
GTTCCGCTTGTCTCCATAAAAACCGCCAGTCTAGCTATCGCCATGTAAGCCCACTGCAAGCTACCTGCTTCTCTTTGCGCTTGGCTTTCCCT
TGCCAGATAGCCAGTACTGACATTCACCCGGGAAAAAAAACCCCGCCCTGACAGGGCGGGGTTTTTTTTTTCAGATAAAAAAATCCTTAG
CTTTCCGTAAGGATGATTTCTGCAATTGGCGGCCGCTTCTAGAGTACACAGGAAAGTACTAGATGCGTAAAGGAGAAGAACTTTTCACTGGAG
TTGTCCCAATTTCTGTTGAATTAGATGGTATGTTAATGGGCACAAATTTTCTGTGAGTGGAGAGGGTGAAGGTGATGCAACATACGGAAAAC
TACCCTTAAATTTATTTGCACTACTGAAAACTACCTGTTCCATGGCCAACTTGTCACTACTTTCCGTTATGGTGTTCATGCTTGGCAGA
TACCAGATCATATGAAACAGCATGACTTTTCAAGAGTGCATGCCCAGAGGTTATGTACAGGAAAGAACTATATTTTTTCAAAGATGACGGGA
ACTACAAGACACGTGCTGAAGTCAAGTTTGAAGGTGATACCCTTGTTAATAGAATCGAGTTAAAAGGTATTGATTTTAAAGAAGATGAAACAT
TCTTGGACACAAATTTGGAATACAATACTACACAATGTATACATCATGGCAGACAAACAAAAGAAATGGAATCAAAGTTAACTTCAAAT
AGACACAACATTTGAAGATGGAAGCGTTCAACTAGCAGACCAATTAACAACAAATACTCCAATTTGGCGATGGCCCTGTCTTTTACCAGACAAC
ATTACCTGTCCACACAATCTGCCCTTTTCGAAAGATCCCAACGAAAAGAGAGACCACATGGTCTTCTTGAGTTTGTAAACAGCTGCTGGGATTAC
ACATGGCATGGATGAACTATACAATAATAATACTAGAGCCAGGCATCAAATAAAACGAAAGGCTCAGTCGAAAGACTGGGCCTTTCTGTTTTAT

```

CTGTTGTTTGTGCGGTGAACGCTCTCTACTAGAGTCACACTGGCTCACCTTCGGGTGGGCCTTTCTGCGTTTATATACTAGAAATGCACTAGTAGC  
GGCCGCTGCACTCCGGCAAAAAACGGGCAAGGTGTACCACCCTGCCCTTTTCTTTAAAAACGAAAAGATTACTTCGCGTTGGAGAGCGTTC  
ACCGACAACAACAGATAAAACGAAAGGCCAGTCTTTCGACTGAGCCTTTCGTTTATTTGATGCTGGTACCGGGTGTAAATCCCATACTCA  
GCCTTCTAATGCTGAGAGAATGCCTGAAAAAGAACCACTAAGTCAAATTTTGGATTAAGTTTTATTAAGTCAACGGAGGTGTAGATAGCATT  
TAGATCGTAAAAGCATACGGCATGAACAACCATGAACGGCTTCCAGAGGTTAACCCAGGTTTATGGTTTACCAAAATCCCTGACTTTTTCC  
GAGTTGGGGGACAAAATCAACTAATTTGGGCGACGATTTTTCTGCTATCTGGCGATCGCCATGTTTGTCTAACTTCTGATCCAACCTAGGTTT  
TTGGGGCTTTCCAAACAAAATCCAGTTGCCGGCGAAAAATTTGCTGGTGGGGCACAATTTGGTGTCTCCGTAGTCTGCAAACTGCCAGT  
AAAACCTGCGCTTCCGCAAAACCATCCCTGGTGGGAAATAATCGGGACTTCTAACTTTAACGCTTACGCAAGGTACCAAAACAGGCTTGG  
AAAATACCCGTCGCAAAAGGGGCATTAATCCACGGGGACTCGACCATATGGGAGAGCTCCCAACGCGTTGGATGCATAGCTTGAGTATCT  
ATAGTGTACCTAAATAGCTTGGCGTAAATCATGGTCATAGCTGTTTCCGTGTGAAATTTGTATCCGCTCACAATCCACACAACATACGAGCC  
GGAAGCATAAAGTGTAAAGCCTGGGGTGCCTAATGAGTGAGTAACTCACATTAATTCGTTGGCTCAGTGCCTGCTTCCAGTCCGGAAAC  
TGTCGTGCCAGCTGCATTAATGAATCGGCCAACGCGGGGAGAGGGCTTTGCGTATTGGGCGCTTTCCGCTTCTCGCTCACTGACTCGCT  
GCGCTCGGTGCTTCCGCTGCGGGCAGCGGTATCAGCTCAGTCAAAGGCGGTAATACGGTTATCCACAGAATCAGGGGATAACGCAGGAAAGAAC  
ATGTGAGCAAAAGGCCAGCAAAAGGCCAGGAACCGTAAAAAGGCCGCGTGTGGCGTTTTTCCATAGGCTCCGCCCCCTGACGAGCATCACA  
AAAATCGAGCTCAAGTCAGAGTGGCGAAACCCGACAGGACTATAAAGATACCAAGGCGTTTCCCTGGAAGCTCCCTCGTGCGCTCTCTGT  
TCCGACCTGCGGCTTACCGGATACCTGTCCGCTTTCTCCCTTCGGGAAGCGTGGCGCTTTCTCATAGCTCAGCTGTAGGTATCTCAGTTCG  
GTGTAGGTCGTTCCGCTCAAGCTGGGCTGTGTGCACGAACCCCGTTCAGCCGACCGTGCCTTATCCGGTAACTATCGTCTTGAGTCCA  
ACCCGGTAAGACACGACTTATCGCCACTGGCAGAGCCACTGGTAACAGGATTAGCAGAGCGAGGTATGTAGGCGGTGCTACAGAGTTCTTGAA  
GTGGTGCCTAACTACGGCTACACTAGAAGAACAGTATTTGGTATCTGCGCTCTGCTGAAGCCAGTTACCTTCGAAAAAGAGTTGGTAGCTCT  
TGATCCGGCAAAACAAACCCAGCTGGTAGCGGTGTTTTTTTGGTTGCAAGCAGAGATTACGCGCAGAAAAAAGGATCTCAAGAAGATGCTT  
TGATCTTTTCTACGGGCTGACGCTCAGTGGAAACGAAAACCTCAGTAAAGGATTTTGGTTCATGAGATTATCAAAAAGGATCTTACCTAGAT  
CCTTTTAAATTAATAATGAAGTTTTTAAATCAATCTAAAGTATATATGAGTAAACTTGGTCTGACAGTTACCAATGCTTAATCAGTGAAGCACT  
ATCTCAGCGATCTGTCTATTTCTGTTTCATCCATAGTTGCCTGACTCCCCGTCGTGTAGATAACTACGATACGGGAGGGCTTACCATCTGGCCCCA  
GTGCTGCAATGATACCCGCGAGACCCAGCTCACCAGTTCAGATTTATCAGCAATAAACAGCCAGCCGGAAGGGCGAGCGAGAAAGTGGTCC  
TGCAACTTTATCCGCTCCATCCAGTCTAATTAATGTTGCCGGGAAGCTAGAGTAAGTAGTTCGCCAGTTAATAGTTTGCACAACGTTGTTGCC  
ATTGCTACAGGCATCGTGGTGTGACGCTCGTCTGTTGGTATGGCTTATTCAGCTCCGGTCCCAACGATCAAGGCGAGTTACATGATCCCCCA  
TGTTGTGCAAAAAAGCGGTTAGCTCCTTCGGTCCCTCCGATCGTTGTCAGAAGTAAGTTGGCCGCACTGTTATCCTCATGTTTATGGCAGCACT  
GCATAAATCTCTTACTGTATGCCATCCGTAAGATGCTTTTCTGTGACTGGTGTAGTACTCAACCAAGTCAATCTGAGAATAGTGTATGCGGCGA  
CCGAGTTGCTCTTCCCGCGCTCAATACGGGATAAATACCGCGCCACATAGCAGAAGTTTAAAAGTCTCATCATTGGAACGTTCTTCGGGGC  
GAAAACCTCAAGGATCTTACCGCTGTTGAGATCCAGTTCGATGTAACCCACTCGTGCACCCAACTGATCTTACGATCTTTACTTTACCCAG  
CGTTTCTGGGTGAGCAAAAAACAGGAAGGCAAAATGCCGCAAAAAAGGGAATAAGGGCGACACGGAATGTTGAATACTCATACTTTCTTTTT  
CAATATTTTGAAGCATTATCAGGGTTATGTCATGAGCGGATACATATTTGAATGTATTTAGAAAAATAAACAAAATAGGGGTTCCCGGCA  
CATTTCCCGAAAAGTGCACCTGATGCGGTGTGAAATACCGCACAGATGCGTAAGGAGAAAATACCGCATCAGGAAATTTAAGCGTTAATAT  
TTTGTAAATTCGCGTTAAATTTTTGTTAAATCAGCTCATTTTTTAAACCAATAGGCCGAAAATCGGCAAAATCCCTTATAAATCAAAAGAATAG  
ACCGAGATAGGGTTGAGTGTGTTCCAGTTTGGAAACAAGAGTCCACTATTAAGAAGCTGGACTCCAACGTCAAAGGGCGAAAAACCGTCTATC  
AGGGCGATGGCCACTACGTGAACCATACCCATAATCAAGTTTTTGGGGTTCGAGGTGCCGTAAGCACTAAATCGGAACCTTAAAGGGAGCCC  
CCGATTTAGAGCTTACGGGGAAAGCCGGCAAGCTGGCGAGAAAGGAAGGAAAGCAAGGAGCGGGCTAGGGCGCTGGCAAGTGT  
GCGGTACGCTGCCGTAACCA

**Supplementary Figure S19.** Plasmid pSN10K.gfp. The plasmid map with the main features highlighted is depicted in **A** and the FASTA formatted sequence in **B**. N10.3 – 3' homologous region for site N10; N10.5 – 5' homologous region for site N10; TT – double transcriptional terminators; Amp<sup>R</sup> – gene encoding the protein responsible for ampicillin resistance; Km<sup>R</sup> – gene encoding the protein responsible for neomycin/kanamycin resistance; *gfp* – sequence encoding the reporter GFP.

**A**

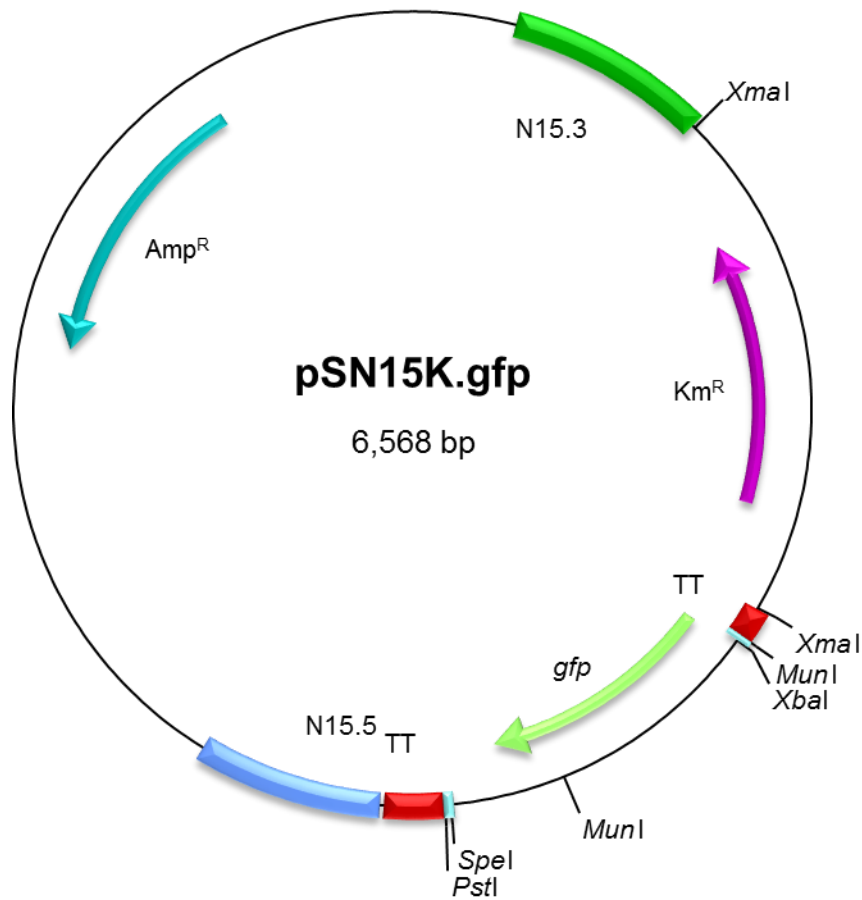

**B**

```
>pSN15K.gfp
CACCCGCGCGCTTAATGCGCCGTACAGGGCGGTCCATTCCGCATTACAGGCTGCGCAACTGTTGGGAAGGGCGATCGGTGCGGGCCTCTTCG
CTATTACGCCAGCTGGCGAAAGGGGATGTGCTGCAAGGCATTAAGTTGGGTAACGCCAGGGTTTTCCAGTACAGACGTTGTAACACGACGG
CCAGTGAATTGTAATACGACTCACTATAGGGCGAATTGGGCCGACCTGCGCATGCTCCCGGCCCCATGGCGGCCCGGGGAATTCGATTCTAAA
CTTACGGCATTGGCATCAACGGGAGCCACCGTCGGAGTAGGGGAAGTAACAACGGGGAACTGGTATTGGTGGGCAAAATTTTTACTAGCCATT
GATTCATGGGGCAGATTGAACGCTCCCAACCACAAAGTCCCCCTAATAACAACGACAGAACTAAATAACAGGAAAAAAGGAATCCAAGGAGT
TACCCCTCTTTATGGGATGGAACCTTACATCGACATTAAGGTGGGAGGGGAGGAGGCAATGGGGACAATGGTGGTCCAGAAAAGGAAGGTGGC
TCCGACGTC AAGGCAACGGGACATCCACAGGATTACAGAAACGAACTGGGGGCTAAGGCGGTTGCCACAATTAGTACAAAAACGGGAGTAG
TCATAGGTGAAAACCCCGACTATAGAATTAGAAAAATTTAACTTTTTATCCGAATTTTATTCGTCATGTTCCCCAAATAACTATCAAAATAAT
TGAAAAATTAATTTGGTCTGTTGGTCAACCGCTCCCTAAAGACCTGGCCATTGTAAGAGATTACACCCGGCGATTACTTTTCGACCTC
ATCTATTAGACTCTCGTTGGATTGCAACTGGTCTATTTCTCTTTTGTGTTGATAGAAAAATCAAAAAGGATTTCAGACTACGGGCCTAAA
GAACTAAAAAATCTATCTGTTTCTTTTCATTTCTGATTTTTTATAGTTTCTGTGTCATGGGCATAAAAGTTGCCTTTTTAAATCACAATTCAGA
AAATATCATAATATCTCATTTCACTAAATAATAGTGAACGGCAGGTATATGTGATGGGTTAAAAAGGATCGATCCTCTAGCGAACCCAGAGTC
CCGCTCAGAAGAACTCGTCAAGAAGGCGATAGAAGGCGATGCGCTGCGAATCGGGAGCGCGGATACCGTAAGACAGAGGAAAGCGGTCAGCCCA
TTCCGCGCAAGCTCTTACAGCAATACACGGGTAGCCAACGCTATGTCCTGATAGCGGTCGCGCACCCAGCCGCGCCACAGTTCGATGAATCCA
GAAAAGCGGCCATTTTCCACCATGATATTTCGGCAAGCAGGCATCGCCATGGGTCACGACGAGATCCTCGCGTCCGGCATCCGCGCCTTGAGCC
TGGCGAACAGTTCCGGCTGGCGGAGCCCTGATGCTCTTCGTCAGATCATCCTGATCGACAAGACCGGCTTCCATCCGAGTACGTGCTCGCTC
GATGCGATGTTTCGCTTGGTGGTGAATGGGCAGGTAGCCGATCAAGCGTATGCAGCCCGCGCATTCATCAGCCATGATGGATACTTTCTCG
GCAGGAGCAAGGTGAGATGACAGGAGATCCTGCCCCGGCACTTCGCCAATAGCAGCCAGTCCCTTCCCGCTTCAGTGACAACGTCGAGCACAG
CTGCGCAAGGAACGCCCGTCTGTCGAGCCAGCCAGATAGCCGCGCTGCTCTGTTGGAGTTCAATTCAGGGCACCCGACAGGTCGGTCTTGACAAA
AAGAACCAGGGCGCCCTGCGCTGACAGCCGGAACAGCGGCGCATCAGAGCAGCCGATTGTCTGTTGTGCCAGTCATAGCCGAATAGCCTCTCC
ACCAAGCGCCGAGAACTGCGTGAATCCATCTGTTCAATCATGCGAAACGATCCCTCATCTGCTCTTGTATCAGATCTTGATCCCTGCG
GCCATCAGATCCTTGGCGGCAAGAAAGCCATCCAGTTTACTTTGACAGGGCTTCCCAACCTTACCAGAGGGCGCCCGAGCTGGCAATTCGGGTTT
GCTTGCTGTCCATAAAAACCGCCAGTCTAGCTATCGCCATGTAAGCCACTGCAAGCTACCTGCTTCTCTTTGCGCTTGCGTTTTTCCTTGTGTC
CAGATAGCCAGTAGCTGACATTCACCCGGGAAAAAACCCTGACAGGGCGGGTTTTTTTTTTCAGATAAAAAAATCCTTAGCTTT
CGCTAAGGATGATTTCTGCAATTTGGCGCGCTTCTAGAGTCACACAGGAAAGTACTAGATGCGTAAAGGAGAAGAACTTTTCACTGGAGTTGT
CCCAATCTTGTGAATTAGATGGTGTGATGTTAATGGGCACAAATTTCTGTGTCAGTGGAGAGGGTGAAGGTGATGCAACATACGAAAACTTACC
CTTAAATTTATTTGCACTACTGGAAAACTACCTGTTCCATGGCCAACTTGTCACTACTTTCGGTTATGGTGTTCATGCTTTGCGAGATACC
CAGATCATATGAACAGCATGACTTTTTCAAGAGTGCCATGCCGAAAGTTATGTACAGGAAAGAACTATATTTTTCAAAGATGACGGGAACTA
CAAGACACGTGCTGAAGTCAAGTTTGAAGTGATACCCTTGTTAATAGAAATCGAGTTAAAGGATTTGATTTTAAAGAAGATGGAACATTTCTT
GGACACAATTTGGAATACAACTATAACTCACACATGTATACATCATGGCAGACAAACAAAAGAAATGGAATCAAAGTTAACTTCAAAATTAGAC
ACAACATTTGAAGATGGAAGCGTTCAACTAGCAGACCATTATCAACAAAATCTCAAATTTGGCGATGGCCCTGTCCTTTTACCAGACAACCATTA
CCTGTCCACACAATCTGCCTTTTCGAAAGATCCCAACGAAAAAGAGAGACCACATGGTCTCTTTGAGTTTGTAAACAGTCTGCTGGGATTACACAT
```

GGCATGGATGAACTATACAAATAAATACTAGAGCCAGGCATCAAATAAAACGAAAGGCTCAGTCGAAAGACTGGGCCCTTCGTTTTATCTGT  
 TGTTTGTCCGGTGAACGCTCTCTACTAGAGTCACACTGGCTCACCTTCGGGTGGGCCCTTTCTGCGTTTATATACTAGAATGCACTAGTAGCGGCC  
 GCTGCAGTCCGGCAAAAAACGGGCAAGGTGTCAACCACCTGCCCTTTTCTTTAAACCGAAAGATTACTTCGCGTTGGAGAGCGTTCACCG  
 ACAAACAACAGATAAAACGAAAGGCCAGTCTTTCGACTGAGCCTTCGTTTTATTTGATGCCTGGTACCGGGTGAATCCATTGGGCACGAGA  
 GTTAGTAAGGCAGTGGCAATTAATAGAGGCTTATGGTTGATTCGCATTGTTTTGCTCCTGAAATTTTCGGCAAATACAAATACTTCGCTCTCT  
 AGCCCTATTAACCATTTTAAACGACAAATGATGGGGCAACGATTAACAATAATGAATAAATTTTATGTTTTTCAAGATGAAATTTGAAAAAT  
 TGATTTCCCTTATATTTCTACTATAGAAGCTAATAACAATTAGATCTAAAATTTGCAAGTATAAAATCAGCAAAATAGTTATATTGTTAATAATT  
 CAATGACCAATAACTCGTACTGTTATCTACTGTTGAAAGCCAAAAAGACGAAACAGTTTAGCCTCCTCCTCCTCGGCGATCGCCAAGCGAAAT  
 GTCATGGGAGATGTTGAGATTGAGCATTTTTTTCTAAAAGCCCTTGCTAAAACAACACATGTGCAGGGTGTCCCGATGTTGACTAAATTC  
 GCGCTCGACCATATGGGAGAGCTCCCAACGCGTGGATGCATAGCTTGAGTATCTATAGTGTACCTAAATAGCTTGGCGTAATCATGGTCA  
 TAGTGTTCCTGTGTGAAATTTGTTATCCGCTCACAATTCACACAACATACGAGCCGGGAGCATAAAGTGTAAAGCCTGGGGTGCCTAATGAG  
 TGAGCTAACTCACATTAATGCGTTGCGCTCACTGCCCCGCTTTCAGTCGGGAAACCTGTGCGTCCAGCTGCATTAATGAATCGGCCAACGCGC  
 GGGGAGAGCGGTTTGCATATTGGGCGCTTTCGCTTCGCTCACTGACTCGCTGCGCTCGGTCGTTTCGGCTGCGGCAGCGGTATCAGCT  
 CACTCAAAGGCGGTAATACGGTTATCCACAGAATCAGGGGATAACGCAGGAAAGAACATGTGAGCAAAAGGCCAGCAAAAGGCCAGGAACCGTA  
 AAAAGCCGCGTTGCTGGCGTTTTTCCATAGGCTCCGCCCTTACGAGCATCACAAAAATCGACGCTCAAGTCAGAGGTGGCGAAACCCGAC  
 AGGACTATAAAGATAACCGCGTTTTCCCTGGAAGCTCCCTCGTCCGCTCTCCTGTTCCGACCTGCGCGTTACCGGATACCTGTCCCGCTTT  
 CTCCTTCGGGAAGCGTGGCGCTTCTCATAGCTCAGCTGTAGGTATCTCAGTTGCGGTGAGGTGCTTCCGCTCCAGCTGGGCTGTGTGACG  
 AACCCCGCTTACGCCGACCGCTGCGCCTTATCCGGTAACTATCGTCTTGAGTCCAACCCGCTAAGACACGACTTATCGCCACTGGCAGCAGC  
 CACTGGTAACAGGATTAGCAGAGCGAGGTATGTAGGCGGTGTACAGAGTCTTGAAGTGGTGGCCTAACACGCTACACTAGAAGAACAGTA  
 TTTGGTATCTGCGCTGCTGAAGCCAGTTACCTTCGGAAAAAGAGTTGGTAGCTCTTGATCCGGCAAAACAAACCCCGCTGGTAGCGGTGTT  
 TTTTGTGTTGCAAGCAGCAGATTACGCGCAGAAAAAAGGATCTCAAGAAGATCCTTTGATCTTTTCTACGGGTCTGACGCTCAGTGGAAACGA  
 AAACCTCAGTTAAGGGAATTTGGTCATGAGATTATCAAAAAGGATCTTCACTAGATCCTTTTAAATTAATAAATGAAGTTTTAAATCAATCTAA  
 AGTATATATGAGTAACTTGGTCTGACAGTTACCAATGCTTAATCAGTGGGCACCTATCTCAGCGATCTGTCTATTTTCGTTTATCCATAGTTG  
 CCTGACTCCCGCTGCTGTAGATAACTACGATACGGGAGGGCTTACCATCTGGCCCCAGTGTGCAATGATACCCGGAGACCCACGCTACCGGC  
 TCCAGATTTATCAGCAATAAACAGCCAGCCGGAAGGGCCGAGCGCAGAAGTGGTCTGCACTTTATCCGCTCCATCCAGTCTATTAATTGT  
 TGCCGGGAAGCTAGAGTAAGTAGTTCGCCAGTTAATAGTTGCGCAACGTTGTTGCCATTGCTACAGGCATCGTGGTGTACGCTCGTCTGTTG  
 GTATGGCTTCATTAGCTCCGTTCCCAACGATCAAGGCGAGTTACATGATCCCCATGTTGTGCAAAAAAGCGGTTAGCTCCTTCGGTCCCTCC  
 GATCGTTGTCAGAAGTAAGTTGGCCGAGTGTATCACTCATGGTTATGGCAGCAGCTGCATAAATTCCTTACTGTATGCCATCCGTAAGATGC  
 TTTTCTGTGACTGGTGTACTCAACCAAGTCATCTGAGAATAGTGTATGCGGCGACCGAGTTGCTCTTCCCGCGCTCAATACGGGATAATA  
 CCGCGCCATAGCAGAACTTTAAAAGTCTCATCATTGGAAAACGTTCTTCGGGGCGAAAACCTCAAGGATCTTACCGCTGTTGAGATCCAG  
 TTCGATGTAACCCACTCGTGCACCAACTGATCTTCAGCATCTTTACTTTTACCAGCGTTTCTGGGTGAGCAAAAAACAGGAAGGCAAAATGCC  
 GCAAAAAAGGGAATAAGGGCGACCGGAAATGTTGAATACTCACTCTTCTTTTCAATATTATTGAAGCATTATCAGGGTTATTGTCTCA  
 TGAGCGGATACATATTTGAATGATTTAGAAAAATAACAATAAGGGGTTCCGCGCATTTCCCGAAAAGTGCACCTGATGCGGTGTGAAA  
 TACCGCACAGATGCGTAAGGAGAAAAATCCGCATCAGGAAATGTAAGCGTTAATATTTGTTAAAATTCGCGTTAAATTTTGTAAAATCAGC  
 TCATTTTTTAACCAATAGGCCGAAATCGGCAAAATCCCTTATAAATCAAAGAATAGACCGAGATAGGGTTGAGTGTGTTCCAGTTTGGAAACA  
 AGAGTCCACTATTAAGAACGTGGACTCCAACGTCAAAGGGCGAAAAACCGTCTATCAGGGCGATGGCCACTACGTGAACCATCACCCCTAATC  
 AAGTTTTTTGGGGTCGAGGTGCCGTAAGCACTAAATCGGAACCTAAAGGGAGCCCGGATTTAGAGCTTGACGGGAAAGCCGGCGAAGCTG  
 GCGAGAAAGGAAGGGAAGAAAGCGAAAGGAGCGGGCGCTAGGGCGCTGGCAAGTGTAGCGGTACGCTGCGCGTAACCACCA

**Supplementary Figure S20.** Plasmid pSN15K.gfp. The plasmid map with the main features highlighted is depicted in **A** and the FASTA formatted sequence in **B**. N15.3 – 3' homologous region for site N15; N15.5 – 5' homologous region for site N15; TT – double transcriptional terminators; Amp<sup>R</sup> – gene encoding the protein responsible for ampicillin resistance; Km<sup>R</sup> – gene encoding the protein responsible for neomycin/kanamycin resistance; *gfp* – sequence encoding the reporter GFP.



**A**

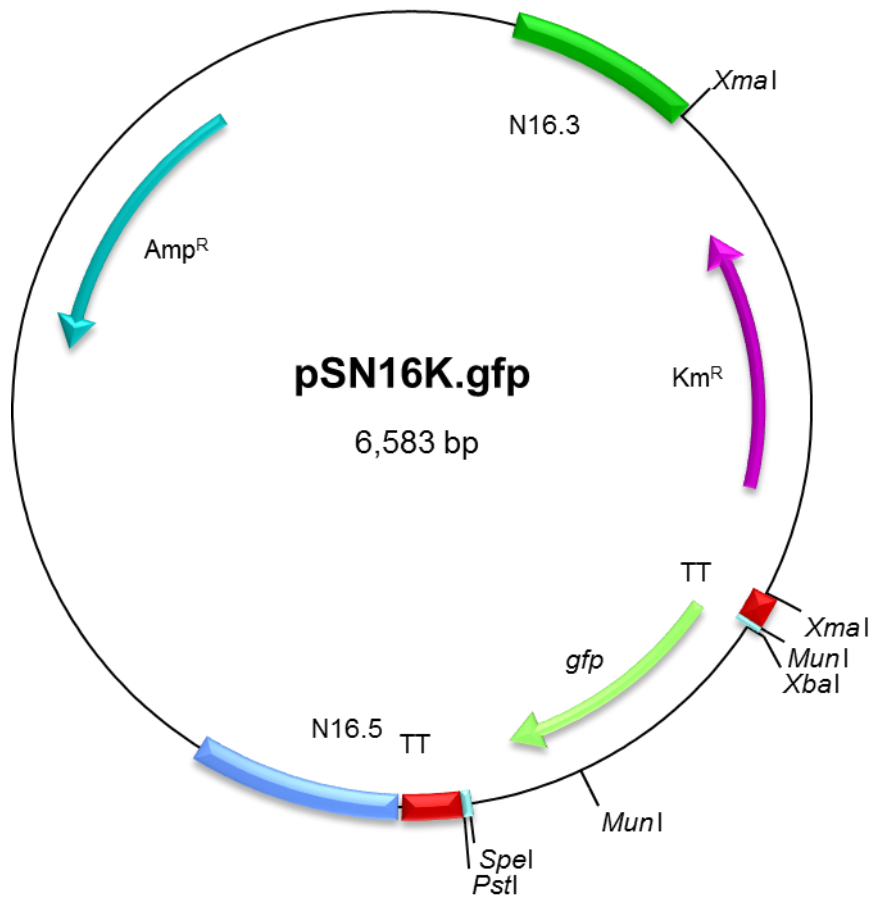

**B**

```
>pSN16K.gfp
CACCCGCGCGCTTAATGCGCCGTACAGGGCGCGTCCATTGCGCATTTCAGGCTGCGCAACTGTTGGGAAGGGCGATCGGTGCGGGCCCTCTTCG
CTATTACGCCAGCTGGCGAAAGGGGATGTGCTGCAAGGCGATTAAAGTTGGGTAACGCCAGGGTTTTCCAGTCACGACGTGTAAAACGACGG
CCAGTGAATTGTAATACGACTCACTATAGGGCGAATTGGGCCCGACGTCGCATGCTCCCGCCGCCATGGCGGCCGCGGGAATTCGATTGTGAG
CTTGATGGTGATGGTGGGTAAAGCTTCATTGTCCATGCGCCGGAGCTTGACGGTAAAATCCGTGTCTGGGGCCAATCATTGGGAACGCTCACA
CAGATACCGTTGCGAGTTAAGTGAAGGATACCCCAACCAATCCCTTCCATATCGAACACTTGGCAAAGGCCAACATCCGCTCTCCTGCC
GTCGCTCCTGCACCCCTGGAGATGGGCAATGGTTAGGGCTTCTTGGGAGAGGGAAGATGGAGAATCTTGAGCCATGGAGATTATTTCTCGGT
TAAATTAGGTTTACCTAGTAAATGGGCCAGGTTGACCAATATTGTAGTCATTACCTGGGTCGATCTTCCCTCCATCAGGGTCATTGGTTAATT
GTTGATGAGAAATGGGAAGGATTAATCCATAGATATTTGCCAGTAACTCGATTGAGCAGAATTGGGAAGGACGATTTGGAACTTTGGTTG
ACAGGGCAACAAAGCCAGCAGATTACACCCGGGCGATTTACTTTTCGACCTCATTCTATTAGACTCTCGTTGGATTGCACTGGTCTATTTTC
CTCTTTTGTGTTGATAGAAAATCATAAAAGGATTTGCAGACTACGGGCTAAAGAACTAAAAATCTATCTGTTTCTTTTCATTCTCTGTATTTT
TTATAGTTTCTGTGTCATGGGCATAAAGTTGCCTTTTTAATCACAATTCAGAAAATATCATAAATCTCATTTTCACTAAAATAATAGTGAACGGC
AGGTATATGTGATGGGTTAAAAGGATCGATCCTCTAGCGAACCCAGAGTCCCGCTCAGAAGAACTCGTCAAGAAGGCGATAGAAGGCGATGC
GCTGCGAATCGGGAGCGGCGATACCGTAAAGCACGAGGAAGCGGTCAGCCATTGCGCCGAAGCTCTTTCAGCAATATCAGGGTAGCCAAAGC
TATGTCCTGATAGCGGTCGCGCACACCCAGCCGCGCACAGTTCGATGAATCCAGAAAAGCGGCCATTTCCACCATGATATTCGGCAAGCAGGCA
TCGCCATGGGTACGACAGATCCTCGCCGTGCGGCATCCGCGCCTTGAGCCTGGCGAACAGTTTCGGCTGGCGGAGCCCTGATCTCTCGT
CCAGATCATCCTGATCGACAAGACCGGCTTCCATCCGAGTACGTGCTCGCTCGATGCGATGTTTCGCTTGGTGGTCAATGGGCAGGTAGCCGG
ATCAAGCGTATGCAGCCCGCGCATGTCATCAGCCATGATGGATATTTTCGCGCAGGAGCAAGGTGAGATGACAGGAGATCCTGCCCCGGCACT
TCGCCAATAGCAGCCAGTCCCTTCCCGCTTCAGTGACAACGTCGAGCACAGTTCGCGCAAGGAACGCCGCTCGTGGCCAGCCACGATAGCCGG
CTGCCCTGCTTGGAGTTCAATCAGGGCACCCGACAGGTCGGTCTTGACAAAAAGAACCAGGGCGCCCTGCGCTGACAGCCGGAACACGGCGGC
ATCAGAGCAGCCGATTGTCTGTTGTGCCAGTCAATAGCCGAATAGCCTCTCCACCAAGCGGCGGAGAACCTGCGTGCAATCCATCTTGTTC
ATCATGCGAAACGATCCTCATCCTGTCTCTTGATCAGATCTTGATCCCTGCGCCATCAGATCCTTGGCGGCAAGAAAGCCATCCAGTTTACTT
TGCAGGGCTTCCCAACCTTACCAGAGGGCGCCAGCTGGCAATTCGGTTTCGCTTGTGTCATAAAACCGCCAGTCTAGCTATCGCCATGT
AAGCCACTGTCAAGTACTTTCGGTTATGGTGTTCATGCTTTGCGAGATACCCAGATCATATGAAACAGCATGACTTTTTCAAGAGTGCCATGC
CCGACAGGTTATGTACAGGAAAGAACTATAATTTTCAAAGATGACGGGAACACAGACAGTGTGAAGTCAAGTTTGAAGGTGATACCCCTGT
TAATAGAAATCGAGTTAAAAGGTATGATTTAAAAGAGATGGAACATCTTGGACACAAATGGAAATCAACTAATACTCACACAAATGTATAC
ATCATGGCAGACAAACAAAGAATGGAATCAAAGTTAACTTCAAATTTAGACACAACATTTGAAGATGGAAGCGTTCAACTAGCAGACCATTATC
AACAAAATACTCCAATTTGGCGATGGCCCTGTCTTTTACCAGACAACCATTTACCTGTCCACACAATCTGCCCTTTTCGAAAGATCCCAACGAAAA
GAGAGACCACATGGTCTCTTGTAGTTTGAACAGCTGCTGGGATTACACATGGCATGGATGAACATACAAAATAATAACTAGAGCCAGGCA
```

TCAAATAAAACGAAAGGCTCAGTCGAAAGACTGGGCCTTTCGTTTTATCTGTTGTTTGTGCGGTGAACGCTCTCTACTAGAGTCACACTGGCTCA  
CCTTCGGGTGGGCCTTTCGCGTTTATATACTAGAATGCACTAGTAGCGGCCGCTGCAGTCCGGCAAAAAACGGGCAAGGTGTACCACCCCTG  
CCCTTTTTCTTTAAACCGAAAAGATTACTTCGCGTTGGAGAGCGTTCACCGACAAAACAACAGATAAAACGAAAGGCCAGTCTTTCGACTGAG  
CCTTTCGTTTTATTTGATGCCTGGTACCGGGTGTAAATCGCTGGAGGCGAACTGGGTGAGAACCATAAAATCTTGGGGAACAGGGGAATGTTAAT  
GAACACATGACATGCATAGGATAGCGAATTGATTAAAGCAATGATTCCCCCTGAGATAAATATATTTTGACCCACTGCTCCGCTAATTTTGG  
CGTAATCTGGGCAAAAATTCGTTGGTTTTTCGGAAGGTGAACCCGCTAGCTAGCTTGTATTGCCAAAACCTAACTCATCATTGCTCCATGGCGG  
CCAAAATCTTTAGGACAAAACTCGCCAGAGGTCAAGGCTTGATTTTTTCAGAGGGAAAAATTCCTCGGCTAAATAATCAAAAAGTTGAAAAA  
AAAGTTTTTCAGCTAAGGTGTGATGTTATATTTTATCTTATGTAGACTTTTGAIAAAAAACAAGTCCCCGCAATCAAGCATCATTCACGGAAAA  
AATAATCCTATGCAAACGCTCCACCGCACTAACCGGCAAGCATTACTCAATAAAGTTAAAGAACTATCCCATCTGCCCGCTCGAGAAACGG  
CAAAAGCCTGTGGTTACTACTCGACCATATGGGAGAGCTCCCAACGCGTGGATGCATAGCTTGAGTATTCTATAGTGTACCTAAATAGCTTG  
GCGTAATCATGGTCATAGCTGTTTTCTGTGTGAATTGTTATCCGCTCACAATCCACACAACATACGAGCCGGAAGCATAAAGTAAAGCCT  
GGGTGCTAATGAGTGAGCTAACTCACATTAATTGCGTTCGCGCTCACATGCCCGCTTTCAGTCCGGAAACCTGTCGTGCCAGCTGCATTAATG  
AATCGGCCAACGCGCGGGAGAGCGGTTTGCCTATTGGGCGCTCTCCGCTTCCTCGCTCACTGACTCGCTGCGCTCGGTCGTTGGCTGCGG  
CGAGCGGTATCAGTCACTCAAAGGCGGTAATACGGTTATCCACAGAATCAGGGGATAACGCAGGAAAGAACATGTGAGCAAAAGGCCAGCAAA  
AGGCCAGAACCCGTAAGAAAGCCGCTTTCGCGTTTTTCATAGGCTCCGCCCCCTGACGAGCATCACAAAAATCGAGCTCAAGTCAGAG  
TTGCGCAAAACCCGACAGGATATAAAGATACCAGGCGTTTTCCCCCTGGAAGCTCCCTCGTGCCTCTCCTGACCCCTCCGCTTACCGGA  
TACCTGTCCGCTTCTCCTTCGGAAGCGTGGCGCTTCTCATAGCTCAGCTGTAGGTATCTCAGTTCGGTGTAGGTGTTGCTCCAGC  
TGGCTGTGTGCAGAACCCCGCTTACGCCCCGCTGCGCTTATCCGGTAACTATCGTCTTGAGTCCAACCCGGTAAGACACGACTTATC  
GCCACTGGCAGCAGCCATGGTAACAGGATTAGCAGAGCGAGGTATGTAGGCGGTGTACAGAGTCTTGAAGTGGTGGCTAACACGCGTAC  
ACTAGAAGAACAGTATTTGGTATCTGCGCTCTGCTGAAGCCAGTTACCTTCGGAAAAAGAGTTGGTAGCTTTGATCCGGCAAAACAAACCCG  
CTGGTAGCGGTGGTTTTTTTTGTTTGAAGCAGCAGATTACGCGCAGAAAAAAGGATCTCAAGAAGATCCCTTTGATCTTTTACGGGTCTGA  
CGCTCAGTGGAAACGAAAACCTCACGTTAAGGGATTTTGGTCATGAGATTATCAAAAAGGATCTTCACTTAGATCTTTTAAATTAATAATGAAGT  
TTTAAATCAATCTAAAGTATATAGAGTAACTTGGTCTGACAGTTACCAATGCTTAATCAGTGAGGCACCTATCTCAGGATCTGTCTATTTTC  
GTTCACTCATAAGTTGCTTAAACCCGTCGTGTAGATAACTACGATACGGGAGGGCTTACCATCTGGCCCCAGTGTGCAATGATACCGCGAGA  
CCCACGCTCACCGCTCCAGATTTATCAGCAATAAACACAGCCAGCCGGAAGGGCCGAGCGCAGAAGTGGTCTGCAACTTTATCCGCTCCATC  
CAGTCTATTAATTGTTGCGGGAAGCTAGAGTAAGTAGTTCGCCAGTTAATAGTTTGGCAACGTTGTTGCCATTGCTACAGGCATCGTGGTGT  
CACGCTCGTCTTGGTATGGCTTCATTCAGCTCCGTTCCCAACGATCAAGGCGAGTTACATGATCCCCATGTTGTGCAAAAAAGCCGTTAG  
CTCCTTCGGTCCCTCCGATGTTGTCAGAAGTAAGTTGGCCGAGTGTATCACTCATGGTTATGGCAGCACTGCATAATTTCTTACTGTGTCATG  
CCATCCGTAAGATGCTTTTTCTGTGACTGGTGTGACTCAACCAAGTCATTCTGAGAATAGTGTATCGGGCAGCCAGTTGCTCTTGGCCGGCGT  
CAATACGGGATAATACCGCGCCACATAGCAGAACTTTAAAGTGCTCATCATTGGAAAACGTTCTTCGGGGCGAAAACCTCAAGGATCTTACC  
GCTGTTGAGATCCAGTTCGATGTAACCCACTCGTGCACCACTGATCTTCAGCATCTTTTACTTTTACCAGCGTTTCTGGGTGAGCAAAAAACA  
GGAAGGCAAAAATGCGCAAAAAAGGGAATAAGGGCGACACGGAATGTTGAATACTCATACTCTTCCCTTTTCAATATTATTGAAGCATTATC  
AGGGTTATTGTCTCATGAGCGGATACATAATTTGAATGTATTTAGAAAAATAAACAAATAGGGGTTCCGCGCACATTTCCCGAAAAGTGCCACC  
TGATGCGGTGTGAAATACCGCACAGATGCGTAAGGAGAAAATACCGCATCAGGAAATGTAAAGCGTTAATATTTTGTAAATTCGCGTTAAAT  
TTTTGTTAAATCAGCTCATTTTTTAAACCAATAGGCCGAAATCGGCAAAATCCCTTATAAATCAAAAAGAATAGACCAGATAGGGTTGAGTGTG  
TTCCAGTTTGGAAACAAGAGTCCACTATTAAGAAGCGTGACTCCAACGTCAAAAGGGCGAAAAACCGTCTATCAGGGCGATGGCCCACTACGTGA  
ACCATCACCTAATCAAGTTTTTTGGGGTCGAGGTGCCGTAAGCACTAAATCGGAACCCTAAGGGAGCCCGGATTTAGAGCTTGACGGGGA  
AAGCCGGCAACGTGGCGAGAAAGGAAGGAAGAAAGCGAAAGGAGCGGGCGCTAGGGCGCTGGCAAGTGTAGCGGTACGCTGCGGTAACCA  
CCA

**Supplementary Figure S21.** Plasmid pSN16K.gfp. The plasmid map with the main features highlighted is depicted in **A** and the FASTA formatted sequence in **B**. N16.3 – 3' homologous region for site N16; N16.5 – 5' homologous region for site N16; TT – double transcriptional terminators; Amp<sup>R</sup> – gene encoding the protein responsible for ampicillin resistance; Km<sup>R</sup> – gene encoding the protein responsible for neomycin/kanamycin resistance; *gfp* – sequence encoding the reporter GFP.

**A**

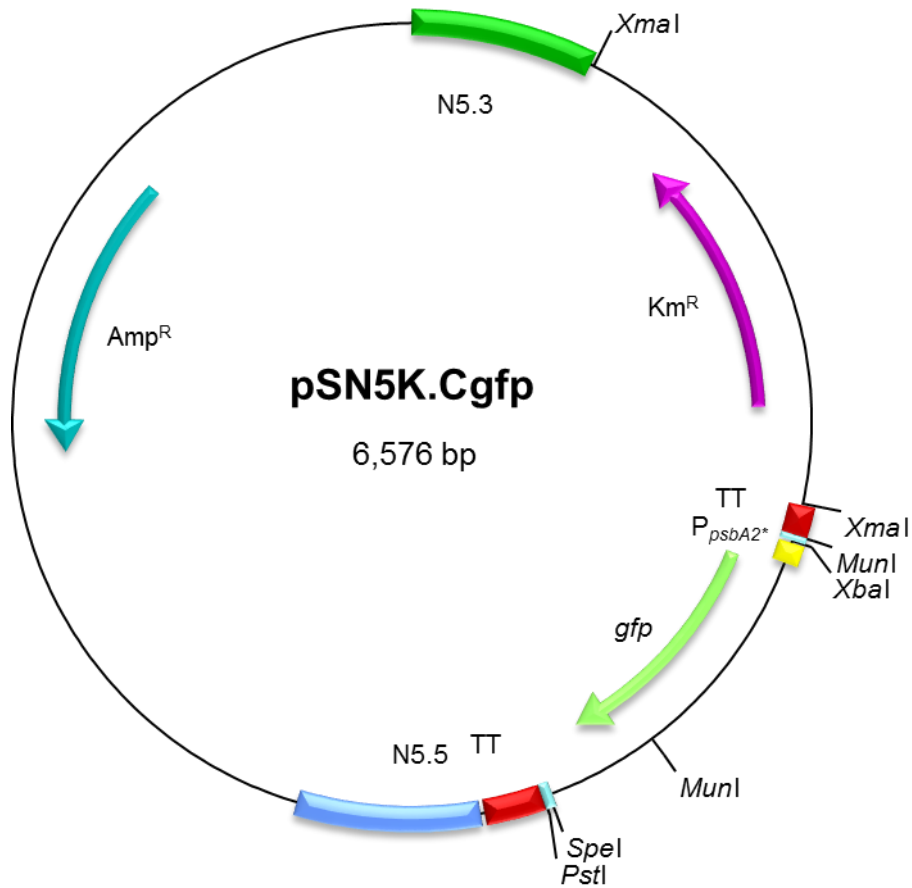

**B**

>pSN5K.Cgfp

```

TGTCCAAATCAGCATTGCTCTGCCAGGTGAGACGGAGTTTTTGTCCACTAATCCCTGTTGGATAGAAGGCGCTTGATACAGTTCCAACCCAAAC
CCAATCTCCTGCTGGCTTAGTTCCTCCACCGTCGGCAGGATTAACGACCCACCCTCTCCAAAGGCCGATAATACGCCTCATCTAAA
TTCTGTTGCAGAGATAAATACTACCTGGTTGGCGGGCAACTGACTGCTAATTTGATAATCCGGGATGCCGCCAGAGGTTTCTGAGGTTGAA
ACAGCGTAGCTAGGAAATCACCACCAGAGCGGGATCGCCACCAATACCATCCGCCAGGCGCCATTGCTTATCTGTGGACTGCCCTAAAAATT
GCCATAAAAAACACCTGGGGCGTCTTTCCTTGTTCGACTCCAGATGTTTTTCTAATTTCCCTCACACCTGTCTTAAAGTATAAATCACCACCGG
GGATTGTCAAGGCTTCAGGATTACACCCGGGCGATTTACTTTTCGACCTCATTCTATTAGACTCTCGTTTGGATTGCAACTGGTCTATTTTCTC
TTTTGTTTGATAGAAAATCATAAAAGGATTTGCAGACTACGGGCCATAAGAACTAAAAAATCTATCTGTTTTCTTTTCATCTCTGATTTTTT
ATAGTTTCTGTTGCATGGGCATAAAGTTGCCTTTTTAATCACAATTCAGAAAATATCATAATATCTCATTTCCTAAATAATAGTGAACGGCAG
GTATATGTGATGGGTTAAAAGGATCGATCCTCTAGCGAACCCAGAGTCCCGCTCAGAAGAACTCGTCAAGAAGGCCGATAGAAGGCCGATGCGC
TGCGAATCGGGAGCGGCATACCGTAAAGCAGGGAAGCGGTGAGCCATTCGCGCCCAAGCTTTCAGCAATATCACGGGTAGCCAACGCTA
TGCTCTGATAGCGGTCCGCCACACCCAGCCGGCCACAGTCGATGAATCCAGAAAAGCGGCCATTTCCACCATGATATTCGGCAAGCAGGCATC
GCCATGGGTACGACGAGATCCTCGCCGTCCGGCATCCGCCCTTGAGCCTGGCGAACAGTTCGGCTGGCGCGAGCCCTGATGCTCTTCGCTC
AGATCATCTGATCGACAAGACCGGCTTCCATCCGAGTAGTGCCTCGCTCGATGCGATGTTTCGCTTGGTGGTTCGAATGGGCAGGTAGCCGAT
CAAGCGTATGCAGCCCGCATTGCATCAGCCATGATGGATACCTTTCGGCAGGAGCAAGGTGAGATGCAGGAGATCTGCCCCGGCAGCTTC
GCCAATAGCAGCCAGTCCCTTCCCGCTTCAGTGACAACGTCGACACAGCTGCGCAAGGAACGCCCGCTCGTGGCCAGCCAGCAGTCCGCT
GCCTCGTCTTGGAGTTTCATTAGGGCACCGGACAGGTCCGTCTTGACAAAAGAACCAGGGCGCCCTGCGCTGACAGCCGGAACACGGCGGCAT
CAGAGCAGCCGATGTCTGTGTGCCAGTCATAGCCGAATAGCCTCTCCACCCAAAGCGGCCGAGAACCCTGCGTCAATCCATCTTGTTCAT
CATGGCAAACGATCTCATCTGCTCTTGATCAGATCTTGATCCCTGCGCCATCAGATCCTTGGCGCAAGAAAGCCATCCAGTTTACTTTG
CAGGGCTTCCCAACCTTACCAGAGGGCGCCCGCCAGCTGGCAATTCGGTTCGCTTGTGTCATATAAACCCCGCAGTCTAGCTATCCCCATGTAA
GCCACTGCAAGTACCTGCTTTCTTTTCCGCTTGCCTTTCCCTTGTCAGATAGCCAGTAGCTGACATTCACCCGGGAAAAAAAACCC
GCCCTGACAGGGCGGGTTTTTTTTTTCAGATAAAAAAATCCTTAGCTTTCGCTAAGGATGATTTCTGCAATGGCGGCCGCTTCTAGAGAGCT
TTACAAAACCTCTCATTAATCTTTAGACTAAGTTTAGTCAAGTTCGAATCTGTACTAGAGTACACAGGAAAGTACTAGATGCGTAAAGGAGAAG
AATTTTTCACTGGAGTTGCCAATTTCTGTTGAATTAGATGGTGATGTTAATGGGCACAAAATTTCTGTCAGTGGAGAGGGTGAAGGTGATGC
AACATACGAAAACTTACCCTTAAATTTATTTGCACTACTGGAACACTACCTGTTCCATGGCCAACTTGTCACTACTTTCCGGTTATGGTGT
CAATGCTTTGCGAGATACCAGATCATATGAAACAGCATGACTTTTTCAAGAGTGCCATGCCCGAAGGTTATGTACAGGAAGAAGTATATTTT
TCAAAGATGACGGAACTACAAGACCGTGTGAAGTCAAGTTTGAAGGTGATACCCTTGTAAATAGAATCGAGTTAAAAGGTATTGATTTTAA
AGAAGATGGAACATTTCTGGACACAAAATGGAATACAACATAACTACACAAATGTATACATCAATGGCAGACAACAAAAGAATGGAATCAAA
GTTAACTTCAAAATTAGACACAACATTGAAGATGGAAGCGTTCAACTAGCAGACCATTATCAACAAAATACTCCAATGGCGATGGCCCTGTCC
TTTTACCAGACAACCATTACCTGTCCACACAATCTGCCCTTTTCGAAAGATCCCAACGAAAAGAGAGACCATGGTCCCTTCTGAGTTTGTAA
AGCTGCTGGGATTACACATGGCATGGATGAACTATACAAATAATAACTAGAGCCAGGCATCAAATAAAACGAAAGGCTCAGTCGAAAGACTG
GGCTTTTCGTTTTATCTGTTGTTTTGTCGGTGAACGCTCTCTACTAGAGTCACTAGGCTCACCTTCGGGTGGGCCCTTCTGCGTTTTATATACTA
GAATGCCTAGTAGCGGCCGCTGCAGTCCGGCAAAAAACGGGCAAGGTGTACCACCCTGCCCTTTTTCTTTAAAACCGAAAAGATTACTTCG

```

CGTTGGAGAGCGTTCACCGACAAACAACAGATAAAACGAAAGGCCAGTCTTTCGACTGAGCCTTTCGTTTTATTGATGCCTGGTACCGGGTG  
 TAATCGGTTGATTATTTTCAGTGGCCCGCCGATGGATAATTACCATGGCCCGACCGACCGGGATTTCAGACCAGTGTGAACAGTATTAATTA  
 GCCTTTCGGGACAAAGCCCTCTGTGAAAACTTAAAAAAGTATTAAGATTTAAAAAGCTAGCTTATTTTCGGAGGAAATGTGTTTACTCGACTTG  
 CCCAGCAACACCGCGATTTCGTGAAGGATTTAGTCATGAGCTTGGAGGCTTGGCCACTGTGCTCGAAAAATCGGGGCTACATTGCTTCTTGCTA  
 CACTGTGGCGACCAACTCAACAGCGCCTCCTTCATGGTGGCTTGGGGGAAAAATCATCTGATCGGCTTTTGGTATCGGACTACGGCATCACC  
 TGGACAGAAATGCGGGATGACCGAGAATTAATGAAATTAGAAGGAGCCGAGGCGATCGCCAGTTGGAAGAATTTGGCCAATGTGGTCAAATATT  
 GCCTAGCAGATGCCCCACTCGACCATATGGGAGAGCTCCCAACGCGTTGGATGCATAGCTTGAGTATTCATAGTGTCACTAAATAGCTTGG  
 CGTAATCATGGTCATAGCTGTTTTCTGTGTGAAATTTGTTATCCGCTCACAAATCCACACAACATACGAGCCGGAAGCATAAAGTGTAAAGCCTG  
 GGTGTCCTAATGAGTGTAGCTAATCACAATTAATTCGCTTGGGCTCACTGCCCGCTTTCAGTTCGGGAACTGTGCTGCCAGCTGCATTAATGA  
 ATCGGCCAACCGCGGGGAGAGCGGTTTTCGCTATTTGGGCGCTCTCCGCTTCCCTCGCTCACTGACTCGCTGCGCTCGGTCGTTCCGGCTGCGGC  
 GAGCGGTATCAGCTCACTCAAAGCGGTAATACGGTTATCCACAGAATCAGGGGATAACGAGGAAAGAATGTGAGCAAAAGGCCAGCAAAA  
 GGCAGGAACCGTAAAAAGCCGCGTTGCTGGCGTTTTTCCATAGGCTCCGCCCCCTGACGAGCATCACAAAAATCGACGCTCAAGTCAGAGG  
 TGGCGAAACCCGACAGGACTATAAAGATACAGGCGTTTTCCCTGGAAGCTCCCTCGTGGGCTCTCCTGTTCCGACCCTGCCGCTTACCGGAT  
 ACCTGTCCGCTTTCTCCCTTCGGGAAGCGTGGCGCTTTCTCATAGCTCAGCTGTAGGTATCTCAGTTCCGGTGTAGGTCTGCTCCGCTCCAAGCT  
 GGCTGTGTGACGCAACCCCGCTTCAGCCGACCGCTTACCGGTAACATCGTCTTGTAGTCCAACCCGTAAGACACGACTTATCG  
 CCATGGCAGCAGCACTGGTAACAGGATTAGCAGGCGAGGTATGTAGCGGCTACTACAGATTCTTGAAGTGGTGGCCTAACCTACCGGCTACA  
 CTAGAAGAACAGTATTTGGTATCTGCGCTCTGCTGAAGCCAGTTACCTTCGGAAGAGAGTTGGTAGCTCTTGATCCGGCAACAACCACCGC  
 TGTTAGCGGTGGTTTTTTTGTGTTGCAAGCAGCAGATTACGCGCAGAAAAAAGGATCTCAAGAAGATCCTTTGATCTTTTCTACGGGGTCTGAC  
 GCTCAGTGAACGAAACTCAGTTAAGGATTTTGGTCATGAGATTATCAAAAAGGATCTTACCTAGATCCTTTAAATTAATAAATGAAGTT  
 TTAATCAATCTAAAGTATATATAGTAAACTTGGTCTGACAGTTACCAATGCTTAATCAGTGAGGCACCTATCTCAGCGATCTGTCTATTTTCG  
 TTCATCCATAGTTGCTGACTCCCGCTCGTGTAGATAACTACGATACGGGAGGGCTTACCATCTGCCCCAGTGTGCAATGATACCGCGAGAC  
 CCACGCTCACCAGCTCCAGATTTATCAGCAATAAACAGCCAGCCGGAAGGGCCGAGCGCAGAAGTGGTCTGCAACTTTTATCCGCTCCATCC  
 AGTCTATTAATTTGTTGCCGGAAGCTAGAGTAAGTAGTTCGCCAGTTAATAGTTTGGCCACGTTGTTGCCATTTGCTACAGGCATCGTGGTGT  
 ACGCTCGCGTTTTGGTATGGCTTTCATTCAGCTCCGGTTGCCAACGATCAAGGCGAGTTACATGATCCCCCATGTTGTGCAAAAAAGCGGTTAGC  
 TCCTTCGGTCTCCGATCGTTGTCAGAAGTAAGTTGGCCGAGTGTATCACTCATGGTTATGGCAGCACTGCATAATCTCTTACTGTCTATGC  
 CATCCGTAAGATGCTTTTCTGTGACTGGTGGTACTCAACCAAGTCATTTCTGAGAATAGTGTATGCGGGCACCAGTTGCTTTGCCCGCGCTC  
 AATACGGGATAAATACCGCCACATAGCAGAACTTTAAAGTGTCTCATATTGGAACGTTCTTCCGGGGCAAAACTCTCAAGGATCTTACCG  
 CTGTTGAGATCCAGTTTCGATGTAACCCACTCGTGCACCCCACTGATCTTCAGCATCTTTTACTTTTACCAGCGTTTCTGGGTGAGCAAAAAACAG  
 GAAGGCAAAATGCCGCAAAAAAGGGAATAAGGGCGACACGGAAATGTTGAATACTCATACTCTTCCTTTTTCAATATATTGAAGCATTTATCA  
 GGGTATTGTCTCATGAGCGGATACATATTTGAATGATTTAGAAAAATAACAATAAGGGGTTCCGCGCACATTTCCCGGAAAAGTGCCACCT  
 GATGCGGTGTGAAATACCGCACAGATGCGTAAGGAGAAAAATACCGCATCAGGAAATGTAAGCGTTAATATTTGTTAAAAATTCGCGTTAAAT  
 TTTGTTAAATCAGCTCATTTTTTAAACCAATAGCCGAAATCGGCAAAATCCCTTATAAAATCAAAAGAATAGACCAGATAGGGTTGAGTGTGT  
 TCCAGTTTGAACAAGAGTCCACTATTAAGAACGTGGACTCCAACGTCAAAGGGCGAAAAACCGTCTATCAGGGCGATGGCCACTACGTGAA  
 CCATCACCTAATCAAGTTTTTTGGGGTTCGAGGTGCCGTAAGCCTAAATCGGAACCCCTAAAGGAGCCCCGATTTAGAGCTTACCGGGGAA  
 AGCCGGCAACGTGGCGAAGGAAGGAAGAAAGCGAAAGGAGCGGGCGCTAGGGCGCTGGCAAGTGTAGCGGTACGCTGCGCGTAACCAC  
 CACACCCGCGCGCTTAATGCGCCGCTACAGGGCGCGTCCATTCGCCATTCAGGTGCGCAACTGTTGGGAAGGGCGATCGGTGCGGGCCCTCT  
 CGCTATTACGCCAGCTGGCGAAAGGGGATGTGCTGCAAGGCGATTAAGTTGGTAAACGCCAGGGTTTTCCAGTACGACGCTTGTAAAACGAC  
 GGCAGTGAATTTAATACGACTCACTATAGGGCGAATTTGGGCCGACGTCGCATGCTCCCGCCGCCATGGCGGCGCGGGAATTCGAT

**Supplementary Figure S22.** Plasmid pSN5K.Cgfp. The plasmid map with the main features highlighted is depicted in **A** and the FASTA formatted sequence in **B**. N5.3 – 3’ homologous region for site N5; N5.5 – 5’ homologous region for site N5; TT – double transcriptional terminators; Amp<sup>R</sup> – gene encoding the protein responsible for ampicillin resistance; Km<sup>R</sup> – gene encoding the protein responsible for neomycin/kanamycin resistance; P<sub>psba2\*</sub> – synthetic minimal constitutive promoter based on the native promoter of *psba2* gene; *gfp* – sequence encoding the reporter GFP.

**A**

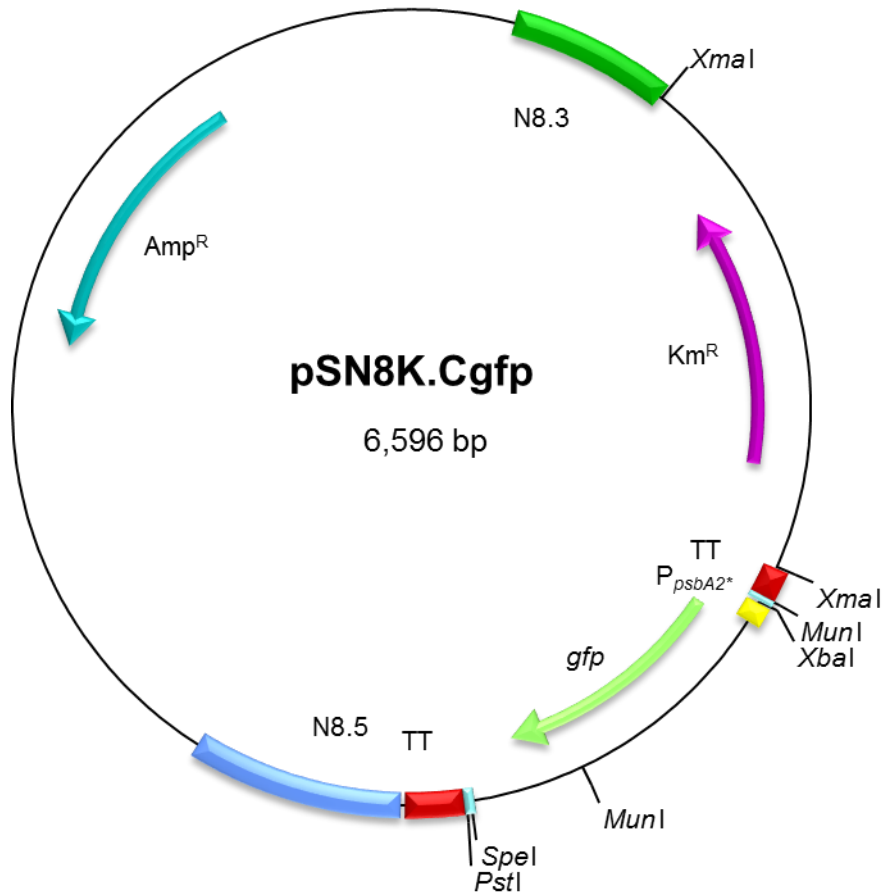

**B**

```

>pSN8K.Cgfp
CACCCGCCGCGCTTAATGCGCCGTACAGGGCGCGTCCATTCGCCATTCAAGGCTGCGCAACTGTTGGGAAGGGCGATCGGTGCGGGCCCTCTTCG
CTATTACGCCAGCTGGCGAAAGGGGATGTGCTGCAAGGCGAATTAAGTTGGGTAACGCCAGGGTTTTCCAGTCACGACGTGTAAACGACGG
CCAGTGAATTGTAATACGACTCACTATAGGGCGAATTGGGCCGACGTCGCATGTCCCGGCCGCATGGCGGCCGCGGGAATTCGATTGATGA
CCGCTGGCGGAGTTTAGTCCAGGGTTATTTGTACCGTCAAGGTTACATTCGCCACCCAGATTTAACTACGCTGCGAGTCCGTACCATTGGCGAT
CGGCCTATCTCACCATTAAAGGTTAAAAATGCCAGCATTGCCCGCTTGGATTTGAGTATGAAATTCCTGTCAGTGGAAAGCCAAATTAATTTTGAC
AGAACTCTGTTACCCGCCCTGATTGAAAATATCGTTATTGCTCGATTACCATTGTTAAACCTGAGAAGTAGACGAGTTTTTGGGGGATAACC
AGGGTCTAATTTTAGCGGAAGTGGAAATTAACCTACACTGGTGAAAAATAAGTCTACTTCCTCGATCGGGGAAGAGGTACGGATGATGCCCCG
CTATTACAACGTCATTTAGCCCAACATCCCTACAAAAATGGTGACAAGATTACACCCGGCGATTTACTTTTCGACCTCATTCTATTAGACT
CTCGTTTGGATTGCAACTGGTCTATTTTCTCTTTGTTTGTATAGAAAATCATAAAAGGATTTGCAGACTACGGGCCATAAGAACTAAAAATC
TATCTGTTCTTTTCACTCTCTGTATTTTTTATAGTTTCTGTTGATGGGCATAAAGTTGCCTTTTTAATCACAATTCAGAAAATATCATAATA
TCTCATTTCACATAAATAAGTGAACGGCAGGTATATGTGATGGGTTAAAAAGGATCGATCCTCTAGCGAACCCAGAGTCCCGCTCAGAAGAA
CTCGTCAAGAAGGCGATAGAAGGCGATGCGCTGCGAATCGGGAGCGCGATACCGTAAAGCACGAGGAAGCGGTACGCCATTCGCCGCCAAGC
TCTTCAGCAATATACGGGTAGCCAACGCTATGTCTGATAGCGGTCCGCCACACCCAGCCGGCCACAGTCGATGAATCCAGAAAAGCGGCCAT
TTCCACCATGATATTCGGCAACGAGGCATCGCCATGGGTACGACGAGATCCTCGCCGTGCGGCATCCGCGCTTGAGCCTGGCGAACAGTTC
GGCTGGCGCGAGCCCTGATGCTCTTCGTCCAGATCATCCTGATCGACAAGACCGGCTTCCATCCGAGTACGTGCTCGCTCGATGCGATGTTTC
GCTTGGTGGTCAATGGGCGAGTAGCCGATCAAGCGTATGCAGCCGCCGATTCGATCAGCCATGATGGATACTTTCTCGGCAGGAGCAAGGT
GAGATGACAGGAGATCCTGCCCGGCACTTCGCCCAATAGCAGCCAGTCCCTTCCCGCTTCAGTGACAACGTCGAGCACAGCTGCCAAGGAAC
GCCCGTCTGGCCAGCCAGATAGCCCGCTGCCTCGTCTTGGAGTTCATTACGGGCACCGGACAGGTGGTCTTGACAAAAGAACCGGGCGC
CCCTGCGCTGACAGCCGGAAACCGGCGGCATCAGAGCAGCCGATGTCTGTGTGTCGCCAGTCATAGCCGAATAGCCTTCCACCCAAGCGGCCG
GAGAACCTGCGTGAATCCATCTTGTTCATCATGCGAAACGATCCTCATCTGTCTCTTGATCAGATCTTGATCCCTGCGCCATCAGATCCT
TGCGGGCAAGAAAGCCATCCAGTTTACTTTGCAAGGCTTCCCAACCTTACCAGAGGGCGCCCAAGCTGGCAATTCGGGTTTCGCTTGTCCAT
AAAACCGCCAGTCTAGCTATCGCCATGTAAGCCCACTGCAAGCTACCTGCTTTCTTTGCGCTTGCCTTTCCCTTGTCCAGATAGCCAGT
AGCTGACATTCACCCGGGAAAAAAAACCCCGCCCTGACAGGGCGGGTTTTTTTTTCAGATAAAAAAAAATCCTTAGCTTTCGCTAAGGATGAT
TTCTGCAATTGGCGGCCGCTTCTAGAGAGCTTTACAAAACCTCTCATTAACTCTTTAGACTAAGTTTAGTCAGTTCCAATCTGTACTAGAGTCA
ACAGGAAAGTACTAGATGCGTAAAGGAGAAGAACTTTTCACTGGAGTTGTCCTCAATCTTCTGTTGAATTAGATGGTATGTTAATGGGCACAAAT
TTTCTGTCACTGGAGAGGTTGAAGGTGATGCAACATACGGAAACTTACCCTTAAATTTATTTGCACTACTGGAAAACCTACCTGTTCCATGGCC
AACCTTGTCACTACTTTTCGGTTATGGGTTTCAATGCTTTGCGGATACCCAGATCATATGAAACAGCATGACTTTTTCAAGAGTGCCATGCC
GAAGGTTATGTACAGGAAAGAACTATATTTTTCAAGATGACGGAACTACAAGACAGTGTGAGTCAAGTTTGAAGTGATACCCCTTGTTA
ATAGAATCGAGTTAAAAGTATTGATTTTTAAAGAGATGGAAACATTTCTGGACACAAATGGAATACAACATACTACACAAATGTATACAT
CATGGCAGACAAACAAAAGATGGAATCAAAGTTAACTTCAAATTTAGACACAACATGAAGATGGAAGCGTTCAACTAGCAGACCAATTATCAA
CAAAATCTCCAATTGGCGATGGCCCTGTCTTTTACCAGACAACCAATTACCTGTCCACACAATCTGCCCTTTTCGAAAGATCCCAACGAAAAGA
GAGACCACATGGTCTTCTGAGTTTGTAAACAGTGTGGGATTACACATGGCATGGATGAACTATACAAATAATAACTAGAGCCAGGCATC

```

AAATAAAACGAAAGGCTCAGTCGAAAGACTGGGCCTTTCGTTTTATCTGTGTTTTGTCGGTGAACGCTCTCTACTAGAGTACACTGGCTCACC  
 TTCGGGTGGGCTTCTCGCTTTTATATACTAGAATGCACTAGTAGCGGCCGCTGCAGTCCGGCAAAAAACGGCAAGGTGTACCACCCTGGC  
 CTTTTCTTTAAACCGAAAAGATTACTTCGCGTTGGAGAGCGTTCACCGACAAAACAACAGATAAAACGAAAGGCCAGTCTTTCGACTGAGCC  
 TTTTCGTTTTATTGATGCCTGGTACCGGGTGAATCCTTCATTCCCCTATTGTTATTAATAGTGTCTGAACTAACAAAAGCAAGATCAAAA  
 TTGTGAAGAAAACGCAACAAAATGAACCATTAAGATAATTTCTGTCTATCCTGGCTGGTATATTCAGCTCTACTCAGAAATGAGTTTGT  
 GACAAATCAGTATGTACCAAAATTACTTGGCGCAATCGATCCTGGTAACTCTATTTGTTGCTTACCCCTGGGTATTGTGGCCATTATCAAAGCA  
 TCGGAAGTTAATTCGTTTAGCTTCAGGGGACTATGAAGGCGCTGTAAAGCTTCCAAGGAAGCGAAAAGTTTTGTTGGTGGTCTTTGGTG  
 CCGGCATAATTTTCATTGCCATCTATTTTGTGCTAGTGGTATTGCGCGCGTCTTTGGTCAAGTAATTAAGTTACATTTTTTGTACTTTGCCTTG  
 TTCACCATTCATTAACGAATACCATGTTTAGTTGAAAAATTATTTCCCCTCTCCATTACTATCCGCTAAGGCCAAGGAATATTTAGTATTAC  
 TTTGGTAACCCCTAACCATGTGCTGTTGCTGGCACTCGACCATATGGGAGAGCTCCCAACCGGTTGGATGCATAGCTTGAGTATCTATAGTGTCA  
 CCTAAATAGCTTGGCGTAATCATGGTCTAGCTGTTTCCGTGTGTAATTTGTTATCCGCTCACAAATCCACACAACATACGAGCCGGAAGCATA  
 AAGTGTAAAGCCTGGGGTGCCTAATGAGTGAAGTAACTCACATTAATTGCGTTGCGCTCACTGCCCCTTTCCAGTCGGGAAACCTGTGCTGCC  
 AGTGCATTAATGAATCGGCCAACGCGCGGGGAGAGGCGGTTTGGGTATTGGGCGCTCTTCCGCTTCCCTGCTCACTGACTCGCTGCGCTCGGT  
 CGTTCGGGTGCGCGAGCGGTATCAGCTCACTCAAAGGCGGTAATACGGTTATCCACAGAATCAGGGGATAACGCAGGAAGAACATGTGAGCA  
 AAAGCCAGCAAAAAGGCCAGGAACCGTAAAAGGCGCGTTGCTGGCGTTTTCCATAGGCTCCGCCCTTGCAGCATCACAAAATCGAC  
 GCTCAAGTCAGAGTGGCGAAAACCCGACAGGACTATAAAGATACAGGCGTTTTCCCTGGAAAGCTCCCTCGTGCCTCTCTGTCCGACCT  
 GCCGCTTACCGGATACCTGTCCGCTTTTCCCTTCGGGAAGCGTGGCGTTTTCTCATAGCTCACGCTGTAGGTATCTCAGTTCGGTGTAGGTC  
 GTTCGCTCCAAGCTGGGCTGTGTGCACGAACCCCGCTTTCAGCCGACCGCTGCGCTTATCCGGTAACATATCGTCTTGAGTCCAACCCGGTAA  
 GACACGACTATCGCCACTGGCAGCAGCCACTGGTAACAGGATTAGCAGAGCGAGGTATGTAGGCGGTGTACAGAGTTCTTGAAGTGGTGGCC  
 TAACTACCGCTACACTAGAAGAACAGTATTTGGTATCTGCGCTCTGCTGAAGCCAGTTACCTTCGGAAGAGTTGGTATCTTGTATCCGCG  
 AAACAACCACCGCTGGTAGCGGTGGTTTTTTTGTGTTGCAAGCAGCAGATTACGCGCAGAAAAAAGGATCTCAAGAAGATCCTTTGATCTTTT  
 CTACGGGTCTGACGCTCAGTGGAACGAAAACCTCACGTTAAGGGATTTTGGTCAAGATATCAAAAAGGATCTTCACCTAGATCCTTTTAAA  
 TTAATAATGAAGTTTAAATCAATCTAAAGTATATATGAGTAACTTGGTCTGACAGTTACCAATGCTTAATCAGTGAGGCACCTATCTCAGCG  
 ATCTGTCTATTTTCGTTCAATAGTTGCTGACTCCCGCTCGTGTAGATAAAGTACGATACGGGAGGGCTTACCACTGGCCCGAGTGTGCAA  
 TGATACCGCGAGACCCACGCTCACCGGCTCCAGATTTATCAGCAATAAACAGCCAGCCGGAAGGGCCGAGCGCAGAAGTGGTCTTCAACTTT  
 ATCCGCTCCATCCAGTCTATTAATTTGTTGCGGGGAGCTAGAGTAAGTGTTCGCCAGTAAATAGTTTTCGCAACGTTGTTGCCATTGTACA  
 GGCATCGTGGTGTACGCTCGTCTGTTGGTATGGCTTCATTCAGCTCCGTTCCCAACGATCAAGGCGAGTTACATGATCCCCATGTTGTGCA  
 AAAAAGCGGTTAGCTCCTTCGGTCCCTCCGATCGTTGCTCAGAAGTAAAGTTGGCCGAGTGTATCACTCATGGTTATGGCAGCACTGCATAATTC  
 TCTTACTGTCTATGCCATCCGTAAGATGCTTTTCTGTGACTGGTGAAGTACTCAACCAAGTCATTCTGAGAAATAGTGTATGCGGCGACCGAGTTGC  
 TCTTGGCCCGGCTCAATACGGGATAATACCGCGCCACATAGCAGAACTTTAAAAGTGTCTCATATGGAACAGTCTTTCGCGGGCAAAACTCT  
 CAAGGATCTTACCGCTGTTGAGATCCAGTTCGATGTAACCCACTCGTGCACCCAACTGATCTTCCAGCATCTTTTACTTTTACCAGCGTTTCTGG  
 GTGAGCAAAAACAGGAAGGCAAAATGCCGCAAAAAGGGAAATAAGGGCGCACAGGAAATGTTGAATACTCATACTCTTCCTTTTTCAATATTAT  
 TGAAGCATTTATCAGGGTATTGCTCTCATGAGCGGATACATATTTGAATGATTTAGAAAAATAAACAATAAGGGTTCGCGCACATTTCCCC  
 GAAAAGTGCCACCTGATCGGGTGTGAAATACCGCACAGATGCGTAAGGAGAAAAATACCGCATCAGGAAATGTAAAGCGTTAATATTTTGTAAA  
 ATTCGCGTTAAATTTTGTAAATCAGCTCATTTTTTAACCAATAGGCCGAAATCGGCAAAATCCCTTATAAATCAAAGAATAGACCGAGATA  
 GGGTTGAGTGTGTTCCAGTTTGGAAACAAGAGTCCACTATTAAGAACGTTGGACTCCAACGTCAAAGGGCGAAAACCGTCTATCAGGGCGATG  
 GCCACTACGTGAACCATACCCTAATCAAGTTTTTGGGGTCGAGGTGCCGTAAGCACATAATCGGAACCCATAAAGGGAGCCCCGATTTAG  
 AGCTTGACGGGAAAGCCGGCAACGTGGCGAGAAAGGAAGGGAAGAAAGCGAAAGGAGCGGGCGCTAGGGCGCTGGCAAGTGTAGCGGTACG  
 CTGCGCGTAACACCA

**Supplementary Figure S23.** Plasmid pSN8K.Cgfp. The plasmid map with the main features highlighted is depicted in **A** and the FASTA formatted sequence in **B**. N8.3 – 3’ homologous region for site N8; N8.5 – 5’ homologous region for site N8; TT – double transcriptional terminators; Amp<sup>R</sup> – gene encoding the protein responsible for ampicillin resistance; Km<sup>R</sup> – gene encoding the protein responsible for neomycin/kanamycin resistance; P<sub>psb2\*</sub> – synthetic minimal constitutive promoter based on the native promoter of *psb2* gene; *gfp* – sequence encoding the reporter GFP.

A

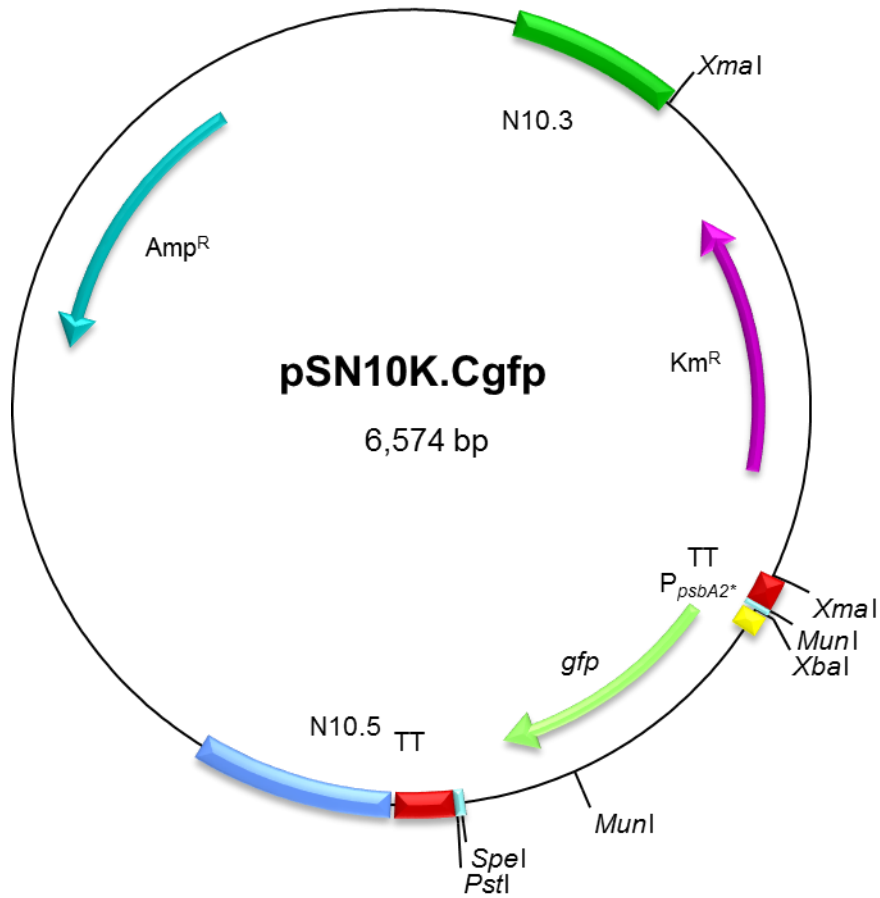

B

>pSN10K.Cgfp  
CACCCGCCGCGCTTAATGCGCCGTACAGGGCGCGTCCATTGCGCATTACAGGCTGCGCAACTGTTGGGAAGGGCGATCGGTGCGGGCCTCTTCG  
CTATTACGCCAGCTGGCGAAAGGGGATGTGCTGCAAGCGATTAAGTTGGGTAAACGCCAGGGTTTTCCAGTACAGACGTTGTAAAACGACGG  
CCAGTGAATTGTAATACGACTCACTATAGGGCGAATTGGGCCGACGTCGCATGCTCCCGCCGCCATGGCGGCCCGGGGAATTCGATTGGACT  
GACCCAAGATACAGTGGTAGCTTCAAGTTCGTCAATCAACCCCAATGGAAAGCTGAGATAATCTGTTGTTGATGCGACCGCTTTCATTTAGCT  
AAAAAGACAAGTCTGTGGCTAGTTACTATGACGAGGCCATCGGGTCTATCCAGCGGTCTTGCTGATTCCAAAACCTGGCGATTTTCTGAAGTA  
GTATCTTTTACCCTTAAGCCGCCAAGGCTTGGATGAGCTTGGTCAATCATCTTTGATGCTCGACATCGGAATAACTTTGTAACGAC  
CTTCCCGAGCTTGAATGCAAAGTCGGTTAGATTATCCATCAGAGTTGAATGCCGATAATACAGACTGCTATACTATTTAATGAAAAGAGTCT  
GGCAAGCAAGCCCGCAACGTTGAAGCTGTGCAGCGCAAACGAAGCGCATTTGTAGTTTGCCTCGGATTACACCCGGGCGATTTACTTTTCGA  
CCTCATTCTATTAGACTCTCGTTTGGATTGCAACTGGTCTATTTTCCTCTTTTGTGTTGATAGAAAATCATAAAAGGATTTGCAGACTACGGCC  
TAAAGAACTAAAAATCTATCTGTTTCTTTTTCATCTCTGTATTTTTTATAGTTTCTGTTGCATGGGCATAAAGTTGCCTTTTAAATCACAAT  
CAGAAAAATCATAATATCTCATTTCACATAAATAATAGTGAACGGCAGGTATATGTGATGGGTTAAAAAGGATCGATCCTCTAGCGAACCCAG  
AGTCCCGCTCAGAAGACTCGTCAAGAAGCGATAGAAGCGATGCGCTGCGAATCGGGAGCGCGATACCGTAAAGCACGAGGAAGCGGTGAG  
CCCATTCCCGCCCAAGCTTTCAGCAATATCACGGGTAGCCAACGCTATGTCTGATAGCGGTCCGCCACACCCAGCCGGCCACAGTCGATGAA  
TCCAGAAAAGCGGCCATTTCCACCATGATATTCGGCAAGCAGGCATCGCCATGGGTACGACGAGATCCTCGCCGTGGGCATCCGCGCCTTG  
AGCTGGCGAAGCAGTTCCGCTGGCGCGAGCCCTGATGCTCTTCCGTCAGATCATCCTGATCGACAAGACCGGCTTCCATCCGAGTACGTGCT  
GCTCGATGCGATGTTTCCGCTTGGTGGTCAATGGCGAGGTAGCCGGATCAAGCGTATGCAGCCGCGCATTGCATCAGCCATGATGGATACTTT  
CTCGGCAGGAGCAAGGTGAGATGACAGGAGATCCTGCCCGGCACTTCGCCCAATAGCAGCCAGTCCCTTCCCGCTTTCAGTGACAACGTCGAGC  
ACAGCTGCGCAAGGAACGCCCTGCTGGCCAGCCAGATAGCCCGCTGCCTCGTCTTGGAGTTCATTAGGGCACCCGACAGGTGCGTCTTGA  
CAAAAAGAACCCGGCGCCCTCGCTGACAGCCGGAACACGCGCGCATCAGAGCAGCCGATTTGCTGTTGTTGCCAGTCAAGCCGAATAGCCT  
CTCCACCAAGCGGCCGAGAACCTGCGTGAATCCATCTTGTCAATCATGCGAAAACGATCCTCATCTGTCTTGTGATCAGATCTTGATCCC  
CTGCGCCATCAGATCCTTGGCGGCAAGAAAGCCATCCAGTTTACTTTGCAGGGCTTCCCAACCTTACCAGAGGGCGCCCCAGTGGCAATCCG  
GTTCCGCTTGTGTCATAAAACCGCCAGTCTAGTATCGCCATGTAAGCCACTGCAAGCTACCTGCTTCTCTTTGCGCTTGCCTTTCCCT  
TGTCAGATAGCCAGTAGCTGACATTCACCCCGGAAAAAACCCTGACAGCCGCGGTTTTCAGATAAAAAAATCCTTAG  
CTTTCGCTAAGGATGATTTCTGCAATTTGGCGGCCGCTTCTAGAGAGCTTTACAAAACCTCATTAAATCCTTTAGACTAAGTTTAGTCAGTTCCA  
ATCTGTACTAGAGTCACAGGAAAGTACTAGATGCGTAAAGGAGAAGAACTTTTCACTGGAGTTGTCCCAATCTTGTGTAATTAGATGGTGA  
TGTTAATGGGCACAAATTTCTGTCAGTGGAGAGGGTGAAGGTGATGCAACATACGGAAAACCTACCTTAAATTTATTTGCACTACTGGAAAA  
CTACCTGTTCCATGGCCAACACTTGTCACTACTTTCGGTTATGGTGTTCATATGCTTTGCGAGATACCCAGATCATATGAAACAGCATGACTTTT  
TCAAGAGTGCCATGCCGGAAGGTTATGTACAGGAAAGAACTATATTTTCAAAGATGACGGGAACACAAGACACGTGCTGAAGTCAAGTTTGA  
AGGTGATACCCCTTGTAAATGAAATCGAGTTAAAAGGATTTGATTTTAAAGAAAGATGGAACATCTTGGACACAATTTGGAATACAACTATAAC  
TCACACAATGTATACATCATGGCAGACAAAAGAAATGGAATCAAAGTTAACTTCAAATTTAGACACAACATTTGAAGATGGAAGCGTTTCAAC  
TAGCAGACCAATTAACAACAAAATACTCCAATTGGCGATGGCCCTGTCTTTTACCAGACAACCATTACCTGTCCACACAATCTGCCCTTTTCGAA  
AGATCCCAACGAAAAGAGAGACCACATGGTCTCTTGTAGTTTGTAAACAGCTGCTGGATTACACATGGCATGGATGAACATACAAAATAATA

TACTAGAGCCAGGCATCAATAAAAACGAAAGGCTCAGTCGAAAGACTGGGCCTTTTCGTTTTATCTGTTGTTGTGCGGTGAACGCTCTCTACTAG  
 AGTCACACTGGCTCACCTTCGGGTGGGCCTTTCTCGCTTATATACTAGAAATGCACTAGTAGCGGCCGCTGCAGTCCGGCAAAAAACCGGGCAA  
 GGTGTACCACCCTGCCCTTTTCTTTAAAACCGAAAAGATTACTTCGCGTTGGAGAGCGTTCACGACAAAACAACAGATAAAAACGAAAAGGCC  
 AGTCTTTTCGACTGAGCCTTTTCGTTTTATTTGATGCCTGGTACCGGGTGAATCCCCATACTCAGCCTTCTAATGTGAGAGAATGCCTGAAAAAG  
 AACCACTAAGTCAAAATTATTTGGATTAAGTTTTATTAAGTCAACGGAGGTGTGATAGCATTGATAGTAAAGCATACGGCATGAACAACC  
 ATGAACGGCTTCCAGAGGTTAACCCAGGTTTTATGGTTTTACCAAAATCCCCTGACTTTTTCCGAGTTGGGGGACAAAATCAACTAATTTGGGC  
 GACGATTTTTCTGCTATCTGGCGATCGCCATGTTTGTCTAACTTCTGATCCAACCTAGGTTTTTGGGGGCTTCCACAAAAAATCCAGTTG  
 CCGCGAAAAATTTGCTGGTGGGGCACAATTTGGTGCTCTCCGTAGTCTGCAAACTGCCAGTAAAACTTGCCTTCCGCAAAACCATCCCTGG  
 TGAGGGAATAATCGGGACTTCTAACTTTAACGCTTCAGCAAAGGTACCAAAACAGGCTTGGAAAATACCGCTCCGCAAAAGGGGATTAATC  
 CACCGGGGACTCGACCATATGGGAGAGCTCCCAACGCGTTGGATGCATAGCTTGAATTTCTATAGTGTACCTAAATAGCTTGGCGTAATCA  
 TGGTCATAGTGTTCCTGTGTGAAATTTATTCGCTCACAATTCACACAACATACGAGCCGGAAGCATAAAGTGTAAAGCCTGGGGTGCTT  
 AATGAGTGTGCTAACTCACATTAATTTGCGTTGCGCTCACTGCCCCGTTTTCCAGTGGGAAACCTGCTGCGCAGCTGCATTAATGAATCGGCCA  
 ACGCGGGGAGAGGCGGTTTTGCGTATTTGGCGCTCTTCCGCTTCTCGCTCAGTACTGCTGCGCTCGGTCGTTCCGGTCCGGGAGCGGTA  
 TCAGTCACTCAAGGCGGTAATACGGTTATCCACAGAATCAGGGGATAACGCAAGAAACATGTGAGCAAAAGGCCAGCAAAAGGCCAGGA  
 ACCGTA AAAAGGCGCGTTGCTGGCGTTTTTCCATAGGCTCCGCCCTTGCAGCAGCATC AAAAAATCGAGCTCAAGTACAGGATGGCGAAA  
 CCGGACAGGACTATAAAGATAACAGGCGTTTTCCCTTGGAAAGCTCCCTCGTGCCTCTCCTGTTCCGACCTGCCGTTACCTGCTCC  
 GCCTTTCTCCCTTCGGGAAGCGTGGCGCTTCTCATAGCTCAGCTGTAGGTATCTCAGTTCGGTGTAGGTGCTTCCGCTCCAGCTGGGCTGTG  
 TGACGAACCCCGTTACGCCCCAGCGCTGCGCTTATCCGGTAACTATCGTCTTGAGTCCAACCCGGTAAAGACACGACTTATCGCCACTGGC  
 AGCAGCCACTGGTAACAGGATTAGCAGAGCGAGGTATGTAGGCGGTGTACAGAGTCTTGAAGTGGTGGCCCTAACTACGGCTACACTAGAAGA  
 ACAGTATTTGGTATCTGCGCTCTGCTGAAGCCAGTTACCTTCGGAAAAAGAGTTGGCAGCTCTTTGATCCGGCAAAACAAACCCCGTGGTAGCG  
 GTGGTTTTTTGTTGCAAGCAGCAGATTACGCGCAGAAAAAAGGATCTCAAGAAGATCCTTTGATCTTTTCTACGGGGTCTGACGCTCAGTG  
 GAACGAAAACCTCAGTTAAGGATTTTGGTCAATGAGATTATCAAAAAGGATCTTACCTAGATCCTTTTAAATTA AAAATGAAGTTTAAATCA  
 ATCTAAAGTATATAGTAACTTGGTCTGACAGTTACCAATGCTTAATCAGTGAAGCCTATCTCAGCGATCTGTCTATTTGCTTCAATCA  
 TAGTTGCGTACTCCCGTGTGTAGATAACTACGATACGGGAGGGCTTACCATCTGGCCCCAGTGTCAATGATACCGCGAGACCCAGCTC  
 ACCGGCTCCAGATTTATCAGCAATAAACAGCCAGCCGGAAGGGCCGAGCGCAGAAGTGGTCTTCAACTTTATCCGCTCCATCCAGCTTATT  
 AATGTTGCGGGGAGCTAGAGTAAGTAGTTCGCCAGTTAATAGTTTGGCAACGTTGTTGCCATTGCTACAGGCATCGTGGTGTACGCTCGT  
 CGTTTGGTATGGCTTCATTACGCTCCGTTCCCAACGATCAAGGCGAGTTACATGATCCCCATGTTGTGCAAAAAGCGGTTAGCTCCTTCGG  
 TCCTCCGATCGTTGTGAGAAGTAAGTTGGCCGAGTGTATCACTCATGTTTATGGCAGCACTGCATAAATCTCTTACTGTCATGCCATCCGTA  
 AGATGCTTTTCTGTGACTGGTGAGTACTCAACCAAGTCATTTCTGAGAATAGTGTATGCGGCGACCGAGTTGCTCTTGCCTGGCGCTCAATACGGG  
 ATAATACCGGCCACATAGCAGAACTTTAAAAGTGTCTCATATTGAAAAACGTTCTTCCGGGCGAAAACCTCTCAAGGATCTTACCCTGTTGAG  
 ATCCAGTTCGATGTAACCACTCGTGCACCAACTGATCTTCAAGTCTTTTACTTTTACCAGCGTTTCTGGGTGAGCAAAAACAGGAAGGCAA  
 AATGCCGCAAAAAGGGAATAAGGGCGACACGGAAATGTTGAATACTCATACTCTCCTTTTTCAATATTATTGAAGCATTATCAGGGTTATT  
 GTCTCATGAGCGGATACATATTTGAATGTATTTAGAAAAATAACAAATAGGGGTTCCGCGCACATTTCCCGAAAAGTCCACCTGATGCGGT  
 GTGAAATACCGCACAGATGCGTAAGGAGAAAAATCCGCACTCAGGAAATGTAAGCGTTAATATTTGTTAAAATTCGCGTAAATTTTTGTTAA  
 ATCAGTCAATTTTTTAACCAATAGGCCGAAAATCGGCAAAATCCCTTATAAATCAAAGAATAGACCGAGATAGGGTTGAGTGTGTTCCAGTTT  
 GGAACAAGAGTCCACTATTAAAGAACGTGGACTCCAACGTCAAAAGGGCGAAAAACCGTCTATCAGGGCGATGGCCCACTACGTGAACCATCACC  
 CTAATCAAGTTTTTTGGGTCGAGGTGCCGTAAGCACTAAATCGGAACCCTAAAGGGAGCCCCGATTTAGAGCTTGACGGGAAAGCCGGCG  
 AACGTGGCGAGAAAGGAAGGGAAGAAAGCGAAAGGAGCGGGCGTAGGGCGTGGCAAGTGTAGCGGTACGCTGCGCGTAACCA

**Supplementary Figure S24.** Plasmid pSN10K.Cgfp. The plasmid map with the main features highlighted is depicted in **A** and the FASTA formatted sequence in **B**. N10.3 – 3' homologous region for site N10; N10.5 – 5' homologous region for site N10; TT – double transcriptional terminators; Amp<sup>R</sup> – gene encoding the protein responsible for ampicillin resistance; Km<sup>R</sup> – gene encoding the protein responsible for neomycin/kanamycin resistance; P<sub>psba2\*</sub> – synthetic minimal constitutive promoter based on the native promoter of *psba2* gene; *gfp* – sequence encoding the reporter GFP.



**A**

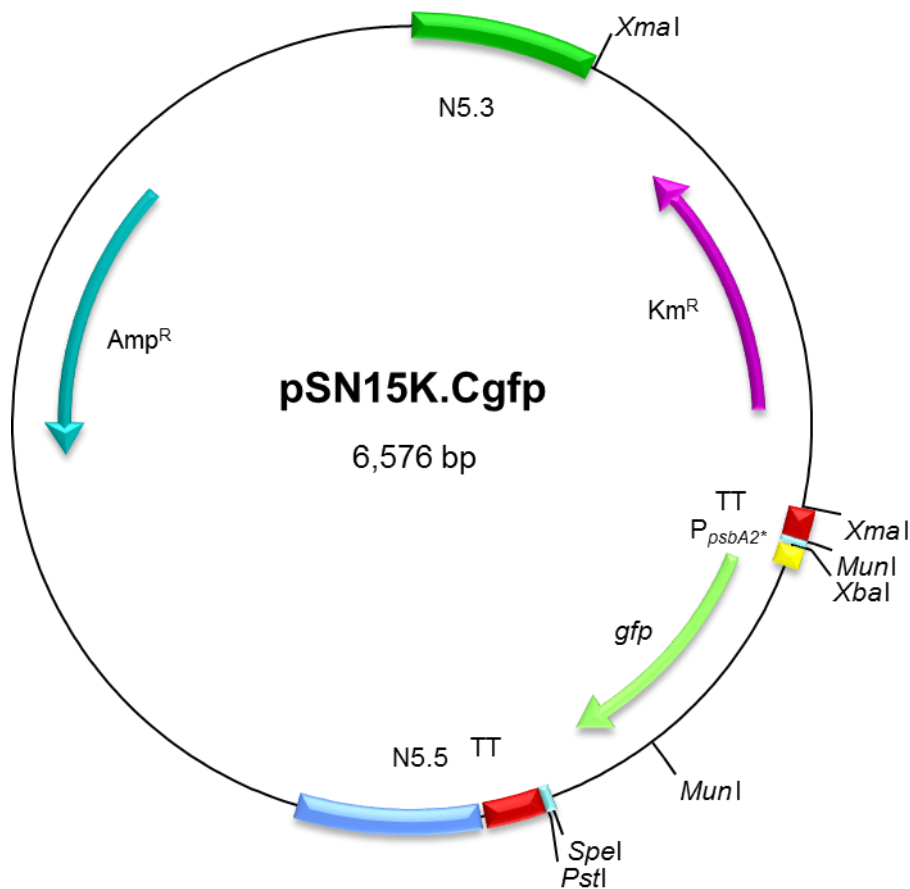

**B**

>pSN15K.Cgfp

```

TGTCCAAATCAGCATTGCTCTGCCAGGTGAGACGGAGTTTTTGTCCACTAATCCCTGTTGGATAGAAGGCGCTTGATACAGTTCCAACCCAAAC
CCAATCTCCTGTCTGGCTTTAGTTTCTTCCACCGTCGGCAGGATTAACGACCCACCCTCTCCAAAGGCCGATAAATACGCCTCATCTAAA
TTCTGTTGCAGAGGATAAATAATCTACCTGGTTGGCGGGCAACTGACTGCTAATTTGATAATCCGGGATGCCGCCAGAGGTTTCTGAGGTTGAA
ACAGCGTAGCTAGGAAATCACCACCAGAGCGGGATCGCCACCAATACCATCCGCCAGGCGCCATTGCTTATCTGTGGACTGCCCTAAAAATT
GCCATAAAAAACACCTGGGGCGTCTTTCCTTGTTCGACTCCAGATGTTTTTCTAATTTCCCTCACACCTGTCTTAAAGTATAAATCACCACCGG
GGATTGTCAAGGCTTCAGGATTACACCCGGGCGATTTACTTTTCGACCTCATTCTATTAGACTCTCGTTTGGATTGCAACTGGTCTATTTTCTCT
CTTTTGTTTGATAGAAAATCATAAAAAGGATTTGCAGACTACGGGCCATAAGAACTAAAAAATCTATCTGTTTCTTTTCATTTCTCTGATTTTTT
ATAGTTTCTGTTGCATGGGCATAAAGTTGCCTTTTTAATCACAATTCAGAAAATATCATAATATCTCATTTCCTAAATAATAGTGAACGGCAG
GTATATGTGATGGGTTAAAAGGATCGATCCTCTAGCGAACCCAGAGTCCCGCTCAGAAGAACTCGTCAAGAAGGCCGATAGAAGGCCGATGCGC
TGCGAATCGGGAGCGGCATACCGTAAAGCAGGGAAGCGGTGAGCCATTCGCGCCCAAGCTTTCAGCAATATCACGGGTAGCCAACGCTA
TGCTCTGATAGCGGTCCGCCACACCCAGCCGGCCACAGTCGATGAATCCAGAAAAGCGGCCATTTCCACCATGATATTCGGCAAGCAGGCATC
GCCATGGGTACGACGAGATCCTCGCCGTCCGGCATCCGCCCTTGAGCCTGGCGAACAGTTCGGCTGGCGCGAGCCCTGATGCTCTTCGTTCC
AGATCATCTGATCGACAAGACCGGCTTCCATCCGAGTAGTGCCTCGCTCGATGCGATGTTTCGCTTGGTGGTTCGAATGGGCAGGTAGCCGGAT
CAAGCGTATGCAGCCCGCATTGCATCAGCCATGATGGATACCTTTCGGCAGGAGCAAGGTGAGATGCAGGAGATCTGCCCCGGCAGCTTC
GCCAATAGCAGCCAGTCCCTTCCCGCTTCAGTGACAACGTCGACACAGCTGCGCAAGGAACGCCCGTCTGGCCAGCCAGCAGCTTCCGCGCT
GCCTCGTCTTGGAGTTCAATTCAGGGCACCGACAGGTCCGTCTTGACAAAAGAACCAGGGCGCCCTGCGCTGACAGCCGGAACACGGCGGCAT
CAGAGCAGCCGATGTCTGTTGTGCCAGTCATAGCCGAATAGCCTCTCCACCCAAAGCGGCCGAGAACCTGCGTCAATCCATCTTGTTCAT
CATGGCAAAACCTCTCATCTCTGATCAGATCTTGATCCCTGCGCCATCAGATCCTTGGCGCAAGAAAGCCATCCAGTTTACTTTG
CAGGGCTTCCCAACCTTACCAGAGGGCGCCCAAGCTGGCAATTCGGTTTCGCTTGTGTTCCATAAAAACCGCCAGTCTAGCTAATCCCATGTAA
GCCACTGCAAGTACCTGCTTTCTTTTCCGCTTGCCTTTCCCTTGTCAGATAGCCAGTAGCTGACATTCACCCGGGAAAAAAAACCC
GCCCTGACAGGGCGGGTTTTTTTTTTCAGATAAAAAAATCCTTAGCTTTCGCTAAGGATGATTTCTGCAATTTGGCGGCCGCTTCTAGAGAGCT
TTACAAAACCTCTCATTAATCTTTAGACTAAGTTTAGTCAAGTTCCTGACTAGAGTACACAGGAAAGTACTAGATGCGTAAAGGAGAA
AATTTTTCACTGGAGTTGCCAATTTCTGTTGAATTAGATGGTATGTTAATGGGCACAAAATTTCTGTCAGTGGAGAGGGTGAAGGTGATGC
AACATACGAAAACTTACCCTTAAATTTATTTGCACTACTGAAAACTACCTGTTCCATGGCCAACTTGTCACTACTTTCCGGTTATGGTGT
CAATGCTTTGCGAGATACCAGATCATATGAAACAGCATGACTTTTTCAAGAGTGCCATGCCCGAAGGTTATGTACAGGAAGAATATATTTT
TCAAAGATGACGGAACTACAAGACCGTGTGAAGTCAAGTTTGAAGGTGATACCCTTGTAAATAGAATCGAGTTAAAAGGTATTGATTTTAA
AGAAGATGGAACATTTCTGGACACAAATGGAATACAACATAACTACACAAATGTATACATCAATGGCAGACAACAAAAGAATGGAATCAAA
GTTAACTTCAAAATTAGACACAACATTGAAGATGGAAGCGTTCAACTAGCAGACCATTATCAACAAAATACTCCAATTTGGCGATGGCCCTGTCC
TTTTACCAGACAACCATTACCTGTCCACACAATCTGCCCTTTTCGAAAGATCCCAACGAAAAGAGAGACCATGGTCCCTTCTGAGTTTGTAA
AGCTGCTGGGATTACACATGGCATGGATGAACTATACAATAATAATACTAGAGCCAGGCATCAAATAAAACGAAAGGCTCAGTCGAAAGACTG
GGCCTTTCGTTTTATCTGTTGTTTTGTCCGTGAAACGCTCTCTACTAGAGTCACTAGGCTCACCTTCGGGTGGGCCCTTCTGCGTTTTATATACTA
GAATGCAC TAGTAGCGCCGCTGCAGTCCGGCAAAAAACGGGCAAGGTGTACCACCTGCCCTTTTTCTTTAAAACCGAAAAGATTACTTCG

```

```

CGTTGGAGAGCGTTCACCGACAAACAACAGATAAAACGAAAGGCCAGTCTTTCGACTGAGCCTTTCGTTTTATTGATGCCTGGTACCGGGTG
TAATCGGTTGATTATTTTCAGTGGCCCGCCGATGGATAATTACCATGGCCCGACCGACCGGGATTTCAGACCAGTTTGAACAGTATTAATTA
GCCTTTCGGGACAAAGCCCTCTGTGAAAATCTTAAAAAGTATTAAGATTTTAAAGCTAGCTTATTTTCGGAGGAAATGTGTTTACTCGACTTG
CCCAGCAACACCCGCGATTTTCGTGAAGGATTTAGTCATGAGCTTGGAGGCTTGGCCACTGTGCTCGAAAAATCGGGGCTACATTGCTTCTTGCTA
CACCTGTGGCGACCAACTCAACAGCGCCTCCTTCATGGTGGCTTGGGGGAAAATCATCTGATCGGCTTTTGGTATCGGACTACGGCATCACC
TGGACAGAAAATGCGGGATGACCGAGAATTAATGAAATTAGAAGGAGCCGAGGCGATCGCCAGTTGGAAGAATTTGGCCAATGTGGTCAAATATT
GCCTAGCAGATGCCCCACTCGACCATATGGGAGAGCTCCCAACGCGTTGGATGCATAGCTTGAGTATTCATAGTGTCACTAAATAGCTTGG
CGTAATCATGGTCATAGCTGTTTTCTGTGTGAAAATTTGTTATCCGCTCACAAATCCACACAACATACGAGCCGGAAGCATAAAGTGTAAGCCTG
GGTGCCTAATGAGTGTAGCTAATCACAATTAATTGCGTTGGCGCTCACTGCCCGCTTCCAGTTCGGGAAACCTGTGCTGCCAGCTGCATTAATGA
ATCGGCCAACCGCGGGGAGAGCGGTTTTCGCTATTTGGGCGCTCTCCGCTTCCCTCGCTCACTGACTCGCTGCGCTCGGTCGTTCCGGCTGCGGC
GAGCGGTATCAGCTCACTCAAAGCGGTAATACGGTTATCCACAGAATCAGGGGATAACGCAGGAAAGAATGTGAGCAAAAAGCCAGCAAAA
GGCCAGGAACCGTAAAAAGCCCGGTTGCTGGCGTTTTTCCATAGGCTCCGCCCCCTGACGAGCATCACAAAAATCGACGCTCAAGTCAGAGG
TGGCGAAACCCGACAGGACTATAAAGATACAGGGGTTTTCCCTCGGAAGCTCCCTCGTGGCGCTCCTGTTCCGACCCTGCCGCTTACCGGAT
ACCTGTCCGCTTCTCCCTTCGGGAAGCGTGGCGCTTCTCATAGCTCAGCTGTAGGTATCTCAGTTCCGGTGTAGGTGCTTCCGCTCCAAGCT
GGGCTGTGTGCAGCAACCCCGCTTCAGCCCGACCGCTTATCCGGTAACTATCGTCTTGTAGTCCAACCCGTAAGACACGACTTATCG
CCACTGGCAGCAGCACTGGTAACAGGATTAGCAGGCGAGGTATGTAGCGGCTACTACAGATTCTTGAAGTGGTGGCCTAACCTACCGGCTACA
CTAGAAGAACAGTATTTGGTATCTGCGCTCTGCTGAAGCCAGTTACCTTCGGAAAAAGAGTTGGTAGCTCTTGATCCGGCAACAACCACCGC
TGTTAGCGGTGGTTTTTTTGTGTTGCAAGCAGCAGATTACGCGCAGAAAAAAGGATCTCAAGAAGATCCTTTGATCTTTTCTACGGGGTCTGAC
GCTCAGTGAACGAAAACACGTTAAGGATTTTGGTCATGAGATTATCAAAAAGGATCTTACCTAGATCCTTTAAATTAATAAATGAAGTT
TTAAATCAATCTAAAGTATATATAGTAAACTTGGTCTGACAGTTACCAATGCTTAATCAGTGAGGCACCTATCTCAGCGATCTGTCTATTTTCG
TTCATCCATAGTTGCCTGACTCCCGCTCGTGTAGATAACTACGATACGGGAGGGCTTACCATCTGCCCCAGTGTGCAATGATACCGCGAGAC
CCACGCTCACCGGCTCCAGATTTTATCAGCAATAAACAGCCAGCCGGAAGGGCCGAGCGCAGAAGTGGTCTGCAACTTTTATCCGCTCCATCC
AGTCTATTAATTTGTTGCCGGGAAGCTAGAGTAAGTAGTTCGCCAGTTAATAGTTTGCACAACGTTGTTGCCATTGCTACAGGCATCGTGGTGT
ACGCTCGCGTTTTGGTATGGCTTTCATTCAGCTCCGGTTCCCAACGATCAAGCGGATACATGATCCCCCATGTTGTGCAAAAAAGCGGTTAGC
TCCTTCGGTCTCCGATCGTTGTCAGAAGTAAGTTGGCCGAGTGTATCACTCATGGTTATGGCAGCACTGCATAATCTCTTACTGTCTATGC
CATCCGTAAGATGCTTTTCTGTGACTGGTGGTACTCAACCAAGTCATCTGAGAATAGTGTATGCGGGCAGCCGAGTTGCTTGGCCCGCGTC
AATACGGGATAATACCGGCCACATAGCAGAACTTTAAAGTGCTCATCATTTGAAAAACGTTCTTCGGGGCGAAAACCTCTCAAGGATCTTACCG
CTGTTGAGATCCAGTTTCGATGTAACCCACTCGTGCACCCCACTGATCTTCAGCATCTTTTACTTTTACCAGCGTTTCTGGGTGAGCAAAAAACAG
GAAGGCAAAATGCCGCAAAAAGGGAATAAGGGCGACACGGAAATGTTGAATACTCATACTCTTCTTTTTCAATATATTGAAGCATTTATCA
GGGTATTGTCTCATGAGCGGATACATATTTGAATGTATTTAGAAAAATAACAATAAGGGGTTCCGCGCACATTTCCCGGAAAAGTGCCACCT
GATGCGGTGTGAAATACCGCACAGATGCGTAAGGAGAAAAATACCGCATCAGGAAATGTAAGCGTTAATATTTTGTAAAAATTCGCGTTAAAT
TTTGTAAATCAGCTCATTTTTTAAACCAATAGCCGAAAATCGGCAAAATCCCTTATAAAATCAAAAGAATAGACCGAGATAGGGTTGAGTGTGT
TCCAGTTTGAACAAGAGTCCACTATTAAGAACGTGGACTCCAACGTCAAAGGGCGAAAACCGTCTATCAGGGCGATGGCCACTACGTGAA
CCATCACCTAATCAAGTTTTTTGGGGTTCGAGGTGCCGTAAGCACTAAATCGGAACCCCTAAAGGAGCCCCCGATTTAGAGCTTGACGGGGAA
AGCCGGCAACGTGGCGAAGGAAGGAAGAAAGCGAAAGGAGCGGGCGCTAGGGCGCTGGCAAGTGTAGCGGTACGCTGCGCGTAACCAC
CACACCCGCGCGCTTAATGCGCCGCTACAGGGCGCGTCCATTCCGCAATCAGGTGCGCAACTGTTGGGAAGGGCGATCGGTGCGGGCCCTCT
CGCTATTACGCCAGCTGGCGAAAGGGGATGTGCTGCAAGGCGATTAAGTTGGTAAACGCCAGGGTTTTCCAGTACAGCTTGTAAAACGAC
GGCAGTGAATTTAATACGACTCACTATAGGGCGAATTTGGGCCGACGTCGCATGCTCCCGCCGCCATGGCGGCGCGGGAATTCGAT

```

**Supplementary Figure S25.** Plasmid pSN15K.Cgfp. The plasmid map with the main features highlighted is depicted in **A** and the FASTA formatted sequence in **B**. N15.3 – 3’ homologous region for site N15; N15.5 – 5’ homologous region for site N15; TT – double transcriptional terminators; Amp<sup>R</sup> – gene encoding the protein responsible for ampicillin resistance; Km<sup>R</sup> – gene encoding the protein responsible for neomycin/kanamycin resistance; P<sub>psb2\*</sub> – synthetic minimal constitutive promoter based on the native promoter of *psb2* gene; *gfp* – sequence encoding the reporter GFP.

**A**

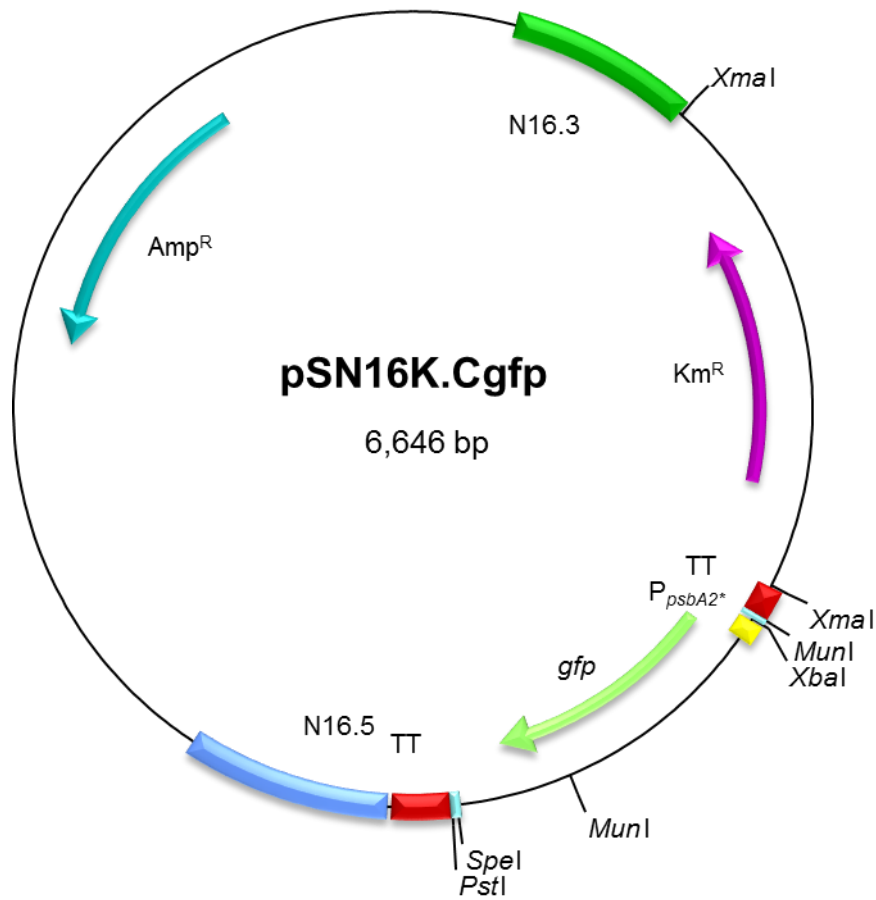

**B**

```

>pSN16K.Cgfp
CACCCGCCGCGCTTAATGCGCCGTACAGGGCGCGTCCATTCCGCATTACAGGCTGCGCAACTGTTGGGAAGGGCGATCGGTGCGGGCCTCTTCG
CTATTACGCCAGCTGGCGAAAGGGGGATGTGCTGCAAGGCGATTAAGTTGGGTAACGCCAGGGTTTTCCAGTACAGACGTTGTAAAACGACGG
CCAGTGAATTGTAATACGACTCACTATAGGGCGAATTGGGCCGACGTCGCATGCTCCCGCCGCCATGGCGGCCGCGGGAATTCGATTGTGAG
CTTGATGGTGATGGTGGGTAAAGCTTCATTGTCCATGCGCCGGAGCTTGACGGTAAAATCCGTGTCTGGGGCCAATCATTGGGAACGCTCACA
CAGATACCGTTGCGAGTTAAGTCGAAGGATACCCCAACCAATCCCTTCCATATCGAACACTTGGCAAAGGCCAACATCCGCTCTCCCTGCC
GTCGCTCCTGCACCCCTGGAGATGGGCAATGGTTAGGGCTTCTTGGGAGAGGGAAGATGGAGAATCTTGAGCCATGGAGATTATTTCTCGGT
TAAATTAGGTTTTACCTAGTAAATGGGCCAGGTTGACCATATTGTAGTCATTCACTGGGTCGATCTTCTTCCATCAGGGTCATTTGGTTAAT
GTTGATGAGAAATGGGAAGGAGTAATCCATAGATATTTGCCAGTTAACTCGATTGAGCAGAATGGGAAGGACGATTGGGAACCTTGGTTG
ACAGGGCAACAAAGCCAGCAGATTACACCCGGGCGATTTACTTTTCGACCTCATCTATTAGACTCTCGTTGGATTGCAACTGGTCTATTTTC
CTCTTTTGTGTTGATAGAAAATCATAAAAGGATTTGCAGACTACGGGCCTAAAGAACTAAAAATCTATCTGTTTCTTTTCTCTCTGATTTTT
TTATAGTTTCTGTGTCATGGGCATAAAGTTGCCTTTTTAATCACAATTCAGAAAATATCATAATACTCATTTCACTAAAATAAGTGAACGGC
AGGTATATGTGATGGGTTAAAAAGGATCGATCCTCTAGCGAACCCAGAGTCCCGCTCAGAAGAACTCGTCAAGAAGGCGATAGAAGGCGATGC
GCTGCGAATCGGGAGCGGCGATACCGTAAAGCACGAGGAAGCGGTCAGCCCATTCGCCGCCAAGCTCTTCAGCAATATCAGGGTAGCCAACGC
TATGTCTGATAGCGGTCGCCACACCCAGCCGCCACAGTCGATGAATCCAGAAAAGCGGCCATTTCCACCATGATATTCGGCAAGCAGGCA
TCGCCATGGGTCACGACGAGATCCTCGCCGTCCGGCATCCGCGCCTTGAGCCTGGCGAACAGTTCCGGCTGGCGGACCCCTGATGCTCTTCGT
CCAGATCATCCTGATCGACAAGACCGGCTTCCATCCGAGTACGTGCTCGTTCGATGCGATGTTTCGCTTGGTGGTCAATGGGCAGGTAGCCGG
ATCAAGCGTATGCAGCCCGCATGTCATCAGCCATGATGGATACTTTCTCGGCAGGAGCAAGGTGAGATGACAGGAGATCCTGCCCCGGCACT
TCGCCAATAGCAGCCAGTCCCTTCCCGCTTTCAGTGACAACGTCGAGCACAGCTGCGCAAGGAACGCCCGTTCGTGGCCAGCCACGATAGCCCG
CTGCCCTGCTTGGAGTTCAATTCAGGGCACCGGACAGGTCGGTCTTGACAAAAAGAACCGGGCGCCCTGCGCTGACAGCCGGAACACGGCGGC
ATCAGAGCAGCCGATTGTCTGTTGTGCCAGTCAATAGCCGAATAGCCTCTCCACCAAGCGGCCGGAGAACCCTGCGTGCAATCCATCTTGTTC
ATCATGCGAAACGATCCTCATCCTGTCTCTTGATCAGATCTTGATCCCTGCGCCATCAGATCCTTGGCGGCAAGAAAGCCATCCAGTTTACTT
TGCAGGGCTTCCCAACCTTACCAGAGGGCGCCAGCTGGCAATTCGGTTTCGCTGCTGTCATAAAACCGCCAGTCTAGCTATCGCCATGT
AAGCCACTGCAAACTACCTGCTTCTCTTTGCGCTTGGCTTTTCCCTTTGTCAGATAGCCAGTACGATGACATTCACCCGGGAAAAAAAAC
CCGCCCTGACAGGGCGGGGTTTTTTTTTTCAGATAAAAAAATCCTTAGCTTTCGTAAGGATGATTTCTGCAATTTGGCGGCCGCTCTAGAGAG
CTTTACAAAACCTCTCATTAACTCTTTAGACTAAGTTTAGTCAGTTCCTGACTAGAGTACACAGGAAAGTACTAGATGCGTAAAGGAGA
AGAACCTTTCACTGGAGTTGTCCCAATCTTGTGAATTAGATGGTGTGTTAATGGGCACAAATTTCTGTGTCAGTGGAGAGGGTGAAGGTGAT
GCAACATACGGAACCTTACCCTTAAATTTATTTGCACACTGGAAGAACTACCTGTCCATGGCCAACACTGTGCTACTACTTTCCGTTATGGTG
TTCAATGCTTTCGAGATACCCAGATCATATGAAACAGCATGACTTTTTCAAGAGTGCCATGCCCGAAGGTTATGTACAGGAAAGAACTATATT
TTTTCAAAGATGACGGAACTACAAGACAGTGTGAAGTCAAGTTTGAAGGTGATACCCTTGTTAATAGAAATCGAGTTAAAGGATTTGATTTT
AAAGAAGATGGAACATCTTGGACACAAATTTGAATACAACATAACTCACACAATGTATACATCATGGCAGACAAAACAAAAGAAATGGAATCA
AAGTTAACTTCAAATTAGACACAACATTTGAAGATGGAAGCGTTCAACTAGCAGACCATTATCAACAAAATACTCCAATTTGGCGATGGCCCTGT
CCTTTTACCAGACAACCATTACCTGTCCACACAATCTGCCCTTTCGAAAGATCCCAACGAAAAGAGACCACATGGTCTTCTTGAGTTTGTGA
  
```

ACAGCTGCTGGGATTACACATGGCATGGATGAACTATACAAATAATAACTAGAGCCAGGCATCAAATAAAACGAAAGGCTCAGTCGAAAGAC  
TGGGCCTTTCGTTTTATCTGTTGTTGTGCGGTGAACGCTCTACTAGAGTCACACTGGCTCACCTTCGGGTGGGCCTTCTCGCTTTATATAC  
TAGAATGCAC TAGTAGCGCCGCTGCAGTCCGGCAAAAAACGGGCAAGGTGTCCACCACCTGCCCTTTTCTTTAAAAACGAAAGATTACTT  
CGCGTTGGAGAGCGTTACCCGACAAAACAACAGATAAAAACGAAAGGCCAGTCTTTCGACTGAGCCTTTCGTTTTATTTGATGCCTGGTACCGGG  
TGTAAATCGCTGGAGGCGAACTGGGTGAGAACCATAAAATCTTGGGGAACAGGGGAATGTTAATGAACACATGACATGCATAGGATAGCGAATTG  
ATTTAAAGCAATGATCCCCCTGAGATAAATATATTTTACCCTGCTCCGCTTAATTTTGGGCTAATCTGGGCAAAAATTCGTTGGTTTTTC  
GGAAAGGTGAACCGTAGCTAGCTTGTATTTGCCCAAACCTAACTCATCATGCTCCATGGCGGCCAAAAATCTTTAGGACAAAACTCGCCAGAG  
GTCAAGGCTTGATTTTTTTCAGAGGGAAAAATTCCTCGGCTAAATAATCAAAAAGTTGAAAAAAAAGTTTTTTCAGCTAAGGTTTGTATTTATAT  
TTTTATCTTATGTAGACTTTTGA AAAAACAGTCCCGCAATCAAGCATCATTTAACGGAAAAATAATCTATGCCAAACGCCCTCCACCGCAC  
TAACCGGCAAGCATTACTCAATAAAGTTAAAGAACTATCCCATCTGCCCGTCGAGAAACGGCAAAAGCCTGTGGTTACTACTCGACCATATG  
GGAGAGCTCCCAACGCGTTGGATGCATAGCTTGTAGTATTCTATAGTGTACCTAAATAGCTTGGCGTAATCATGGTCATAGCTGTTTCCCTGTGT  
GAAATTTGTTATCCGCTCACAAATCCACACAACATACGAGCCGGAAGCATAAAGTGTAAAGCCTGGGGTGCCTAATGAGTGTAGCTAATCACATT  
AATTGCGTTGCGCTCACTGCCCGTTTCCAGTCCGGAAACCTGTGCTGCCAGCTGCATTAATGAATCGGGCAACGCGCGGGGAGAGCGGTTTG  
CGTATTTGGGCGCTTCCGCTTCCCTCGCTCACTGACTCGCTGCGCTCGGTCGTTCCGGCTCGCGGAGCGGTATCAGCTCACTCAAAGGCGGTAA  
TACGGTTATCCACAGAATCAGGGGATAACGCAGGAAAGAACATGTGAGCAAAAGCCAGCAAAAGGCCAGAACCTAAAAAGGCGCTTACTGCT  
GGCGTTTTTCCATAGGCTCCGCCCTTACAGGCATACAAAAATCGAGCCTAAGTCCAGAGGTGGCGAAACCCGACAGGACTATAAAGATAC  
CAGGCGTTTTCCCTGGAAGCTCCCTCGTGCCTCTCCTGTTCCGACCTGCCGCTTACCGGATACCTGTCCGCTTCTCCCTTCGGGAAGCG  
TGCGCTTCTCATAGCTCACGCTGTAGGTATCTCAGTTCCGGTGTAGGTGTTCCCTCCAAGCTGGGCTGTGTGCACGAACCCCCCGTTCAGCC  
CGACCGCTGCCCTTATCCGGTAACTATCGTCTTGAGTCCAACCCGGTAAGACACGACTATCGCCACTGGCAGCAGCCACTGGTAACAGGATT  
AGCAGAGCGAGGTATGTAGGCGGTGCTACAGAGTCTTTGAAGTGGTGGCAAAAAGCCGCTAACGCTACACTAGAAGAACAGTATTTGGTATCTGCGCTC  
TGCTGAAGCCAGTTACCTTCGAAAAAGAGTTGGTAGCTCTTGATCCGGCAAAACAAACCACCGCTGGTAGCGGTGTTTTTTGTTTGAAGCA  
GCAGATTACGCGCAGAAAAAAGGATCTCAAGAAGATCCTTTGATCTTTTCTACGGGGTCTGACGCTCAGTGGAAACGAAAACCTCAGTTAAGGG  
ATTTTGGTCATGATTTCAAAAAGGATCTTACCTAGATCCTTTTAAATTAATAAATGAAGTTTTAAATCAATCAAAGTATATATGATGATAA  
CTTGGTCTGACAGTTACCAATGCTTAATCAGTGAAGCACCTATCTCAGGCATCTGCTCTATTTTCGTTTCATCCATAGTTGCCGACTCCCGCTGT  
GTAGATAACTACGATACGGGAGGGCTTACCATCTGGCCCCAGTGTGCAATGATACCGCGAGACCCACGCTCACCGGCTCCAGATTTATCAGCA  
ATAAACCGCCAGCCGGAAGGGCGAGCGCAGAAAGTGGTCTGCAACTTTATCCGCTCCATCCAGTCTATTAATGTTGCGGGGAGCTAGAG  
TAAGTAGTTCGCCAGTTAATAGTTTGGCAACGTTGTTGCCATTGCTACAGGCATCGTGGTGTACGCTCGTCTGTTGGTATGGCTTCATTACAG  
CTCCGGTTCCCAACGATCAAGGCGAGTTACATGATCCCCATGTTGTGCAAAAAGCCGGTTAGCTCCTTCGGTCCCTCCGATCGTTGTGAGAAAGT  
AAGTTGGCCGAGTGTATCACTCATGGTTATGGCAGCACTGCATAAATCTTACTGTGCATGCCATCCGTAAGATGCTTTTTCTGTGACTGGTG  
AGTACTCAACCAAGTCATTTCTGAGAATAGTGTATGCGGCGACCGAGTTGCTCTTCCCGCGGTCAATACGGGATAATACCGCGCCACATAGCAG  
AACTTTAAAGTGTCTCATCTTGGAAAACGTTCTTCCGGGCGAAAACCTCAAGGATCTTACCCTGTTGAGATCCAGTTTCGATGTAACCCACT  
CGTGACCCCAACTGATCTTCCAGCATCTTTTACTTTTACCAGCGTTTCTGGGTGAGCAAAAACAGGAAGGCAAAAATGCCGCAAAAAGGGAAATAA  
GGGCGACACGAAATGTTGAATACTCATACTCTTCTTTTCAATATTATGAAGCATTTATCAGGGTTATTGTCTCATGAGCGGATACATATT  
TGAATGATTTAGAAAAATAAACAAATAGGGGTTCCGCGCACATTTCCCGGAAAAGTGCCACCTGATGCGGTGTGAAATACCGCACAGATGCGT  
AAGGAGAAAAATACCGCATCAGGAAATGTAAGCGTTAATATTTTGTAAAAATTCGCGTTAAATTTTTGTTAAATCAGTCCATTTTTTAACCAAT  
AGGCCAAATCGGCAAAATCCCTTATAAATCAAAAAGAAATAGACCGAGATAGGGTTGAGTGTGTTCCAGTTTGAACAAGAGTCCACTATTAAA  
GAACGTGGACTCCAACGTCAAAGGGCGAAAACCGTCTATCAGGGCGATGGCCACTACGTGAACCATCACCTAATCAAGTTTTTTGGGGTCCG  
AGGTGCCGTAAAGCAATAATCGGAACCTAAAGGGAGCCCGATTTAGAGCTTGACGGGAAAGCCGGCGAACGTGGCGAGAAAGGAAGGGA  
AGAAAGCGAAAGGAGCGGGCGTAGGGCGTGGCAAGTGTAGCGGTACGCTGCGCGTAACCA

**Supplementary Figure S26.** Plasmid pSN16K.Cgfp. The plasmid map with the main features highlighted is depicted in **A** and the FASTA formatted sequence in **B**. N16.3 – 3' homologous region for site N16; N16.5 – 5' homologous region for site N16; TT – double transcriptional terminators; Amp<sup>R</sup> – gene encoding the protein responsible for ampicillin resistance; Km<sup>R</sup> – gene encoding the protein responsible for neomycin/kanamycin resistance; P<sub>psb2</sub>\* – synthetic minimal constitutive promoter based on the native promoter of *psb2* gene; *gfp* – sequence encoding the reporter GFP.

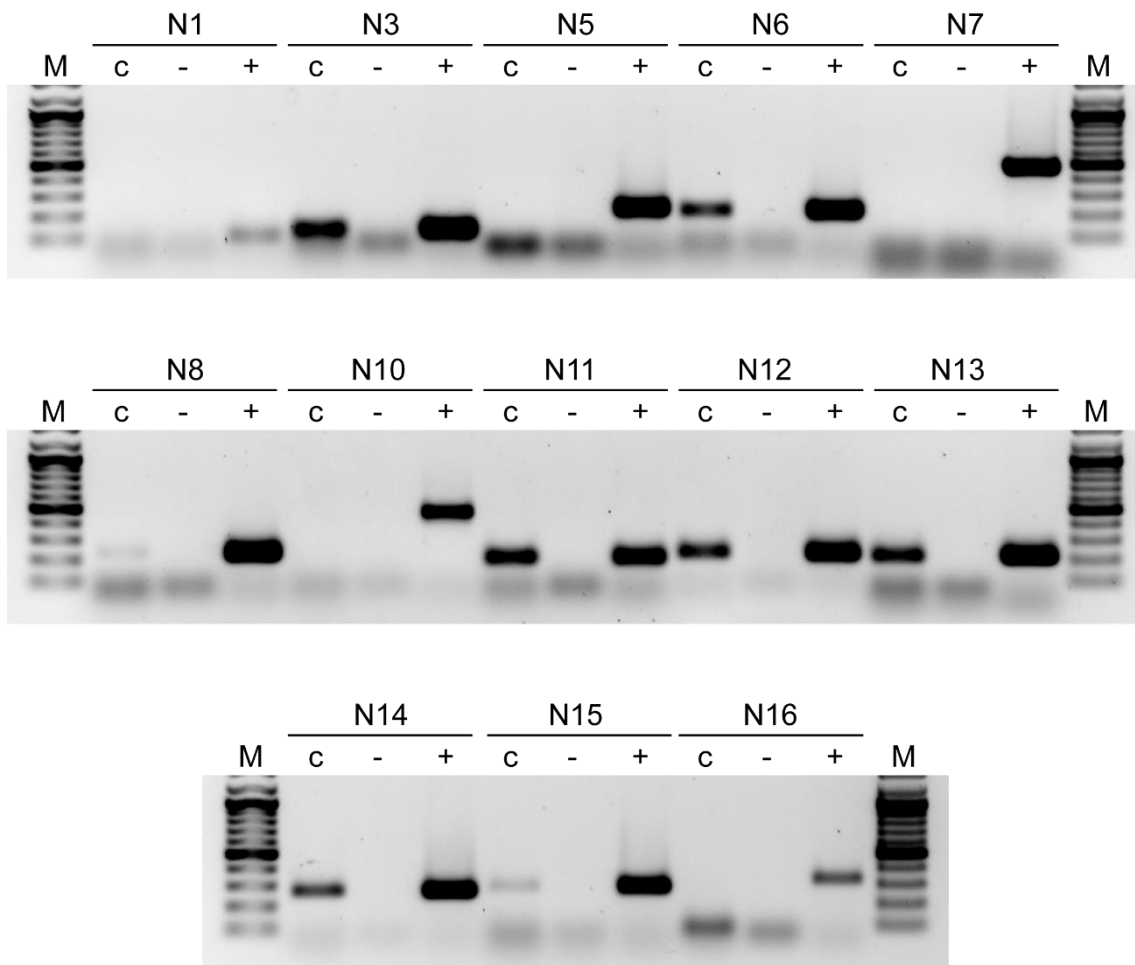

**Supplementary Figure S27.** RT-PCR transcription analysis of thirteen loci (N1, N3, N5, N6, N7, N8, N10, N11, N12, N13, N14, N15, N16). *Synechocystis* wild-type samples for RNA extraction were collected at  $OD_{730} \approx 0.8-0.9$ . These results are representative of the three biological triplicates and technical duplicates. c - cDNA, - negative control (absence of template), + positive control (genomic DNA), M – GeneRuler DNA ladder (Thermo Fisher Scientific).

## A Primers position

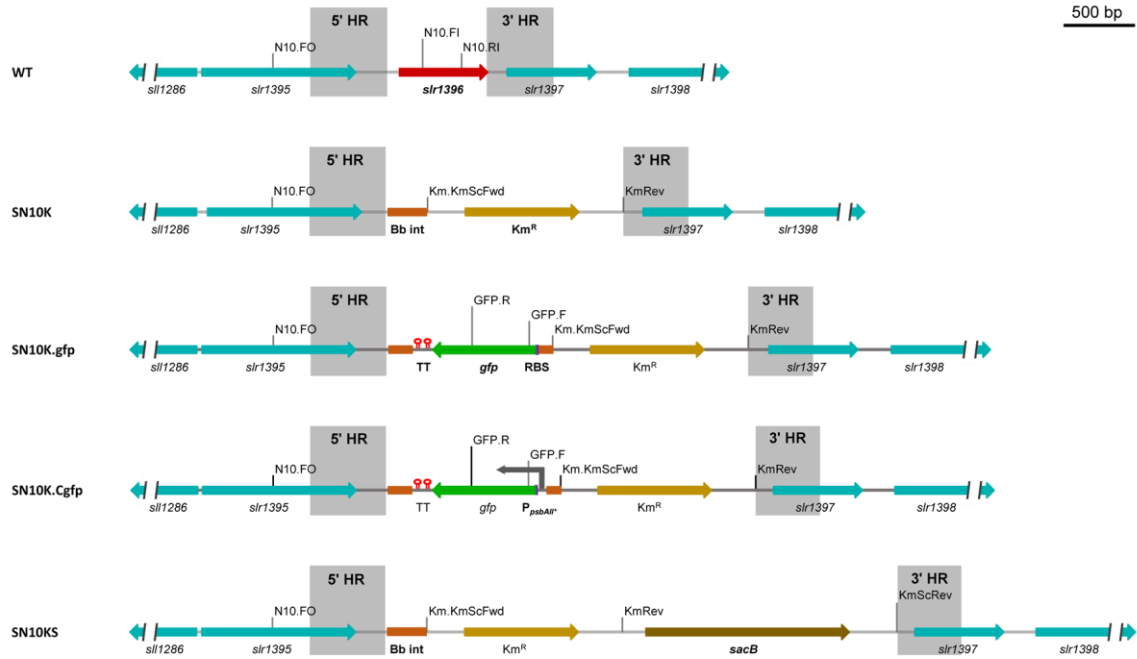

## B PCR with inner primers (Nn.FI/Nn.RI)

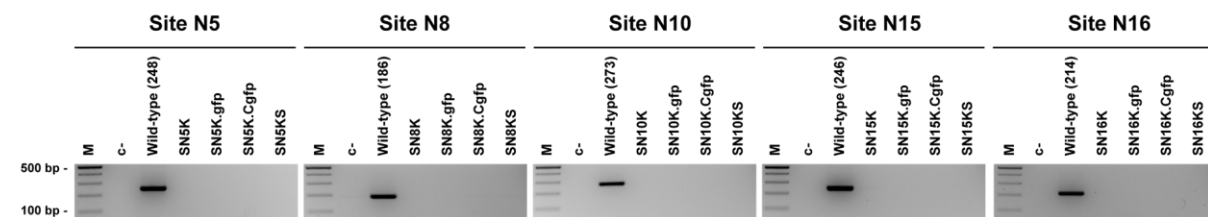

## C PCR with outer and internal primers (Nn.FO/KmRev)

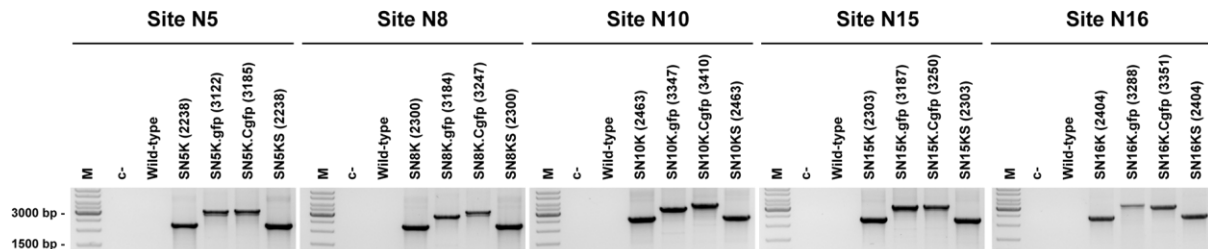

## D PCR with kanamycin primers (Km.KmScFwd/KmRev)

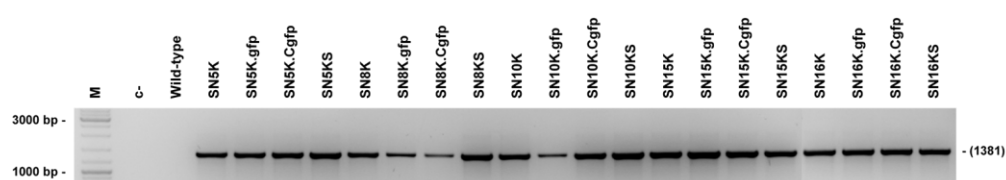

## E PCR with *gfp* primers (GFP.F/GFP.R)

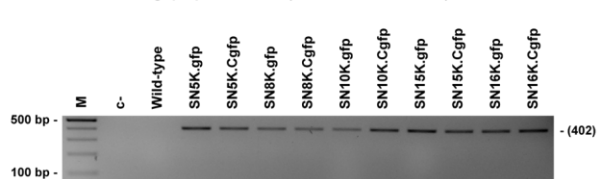

## F PCR with kanamycin/*sacB* primers (Km.KmScFwd/KmScRev)

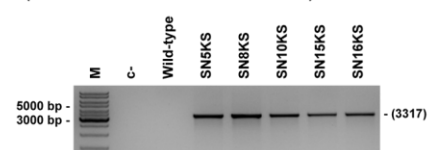

**Supplementary Figure S28.** PCR confirmation of the full segregation of the *Synechocystis* mutants in the five neutral sites (N5, N8, N10, N15, N16). Schematic representation of the position of the primers used for the wild-type and mutants, exemplified for N10 (**A**). PCR reactions were performed using primers within the ORF corresponding to each neutral site (**B**), a primer external to each site and a primer within the selection cassette (**C**), primer amplifying the kanamycin resistance cassette (**D**), primers amplifying the within the *gfp* gene (**E**) or primers amplifying the double selection cassette (**F**) (listed in **Supplementary Table 6**). No template controls were always included (c-) and the expected band sizes are indicated. M – GeneRuler DNA ladder (Thermo Fisher Scientific).

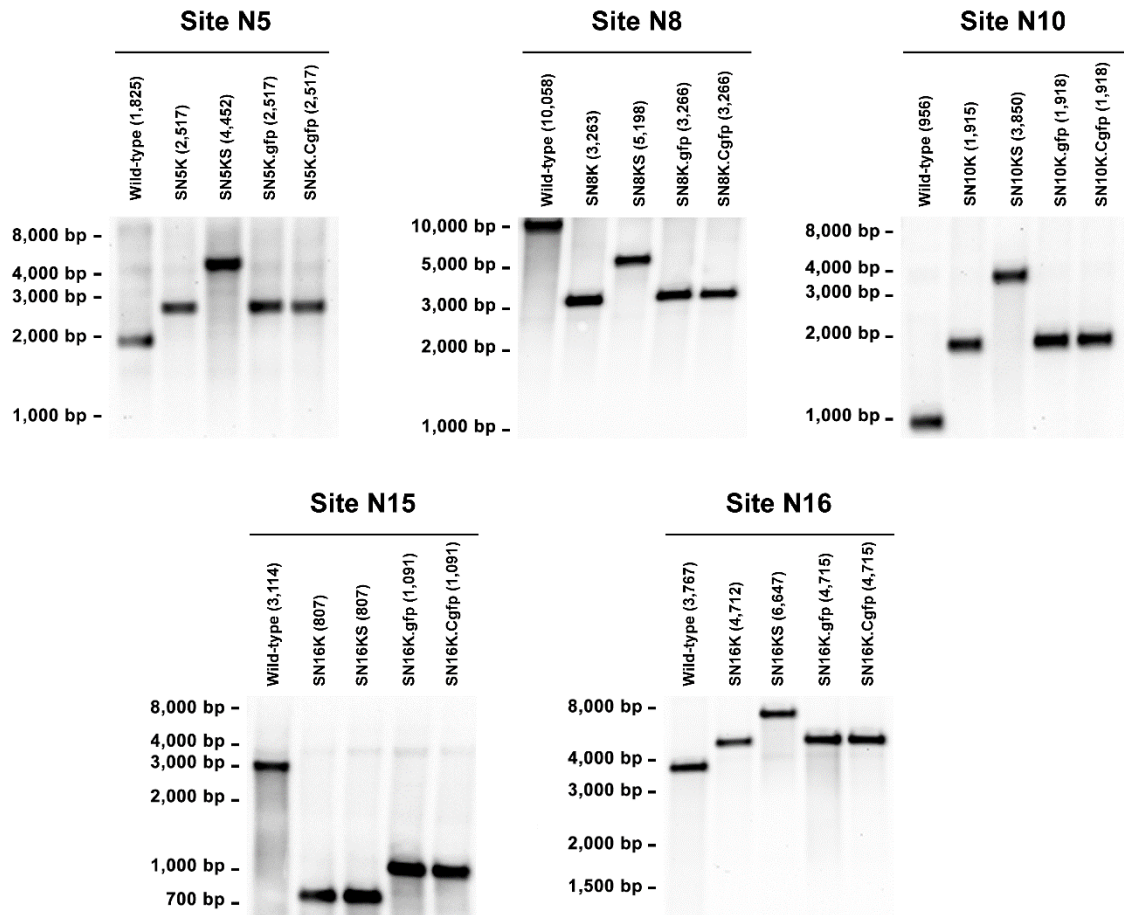

**Supplementary Figure S29.** Southern blot confirmation of the full segregation of the *Synechocystis* mutants in the five neutral sites (N5, N8, N10, N15, N16). Expected band sizes are within brackets. For details see Material and Methods.



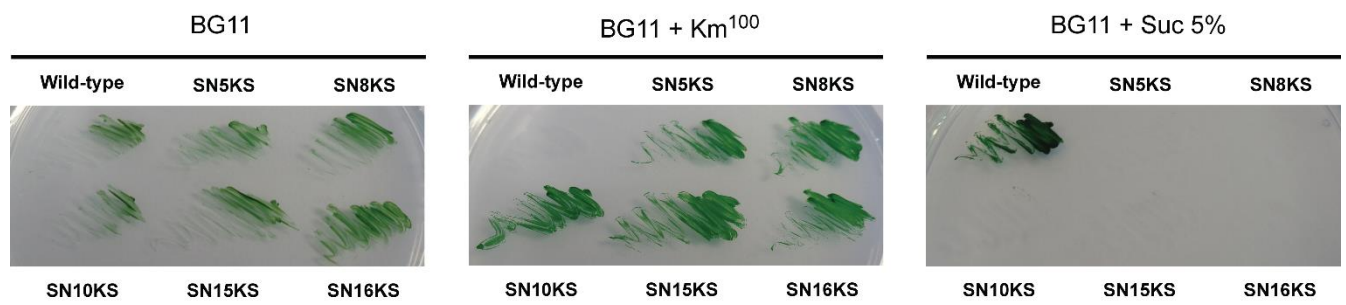

**Supplementary Figure S30.** Phenotypic characterization of mutants harboring the double selection cassette conferring kanamycin resistance and sucrose sensitivity (SN $n$ KS). *Synechocystis* wild-type and mutants were grown in agar plates containing BG11 medium (BG11), BG11 medium supplemented with 100  $\mu\text{g mL}^{-1}$  kanamycin (BG11 + Km<sup>100</sup>) and BG11 medium supplemented with 5% (wt/vol) sucrose (BG11 + Suc 5%).

## A RT-PCR

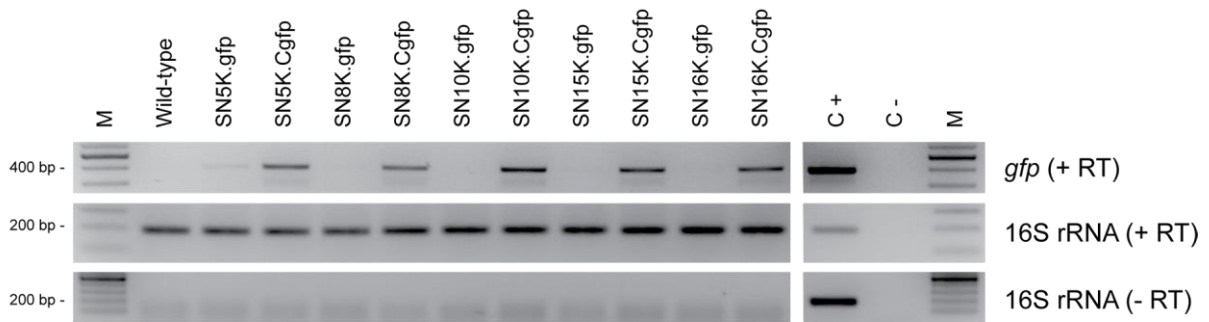

## B Western blot

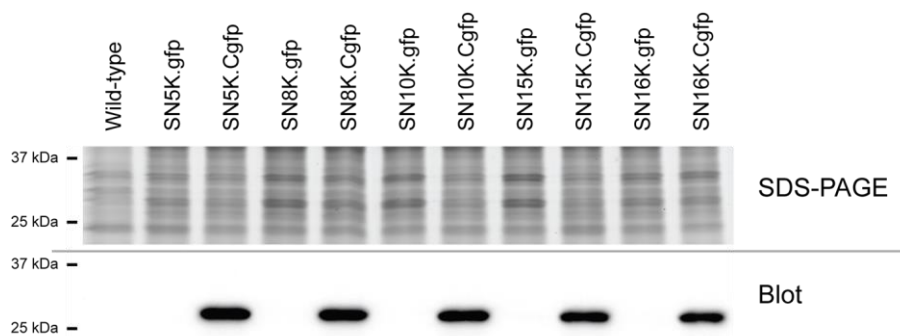

**Supplementary Figure S31.** Detection of *gfp* transcripts and GFP in *Synechocystis* mutants harboring a promoterless *gfp* synthetic module (SN*n*K.gfp) or a module with *gfp* under the control of the synthetic constitutive promoter  $P_{psba2^*}$  (SN*n*K.Cgfp). *gfp* transcription was assessed by RT-PCR (**A**) and GFP expression was assessed by Western blot (**B**). Wild-type was included as control. M – GeneRuler DNA ladder (Thermo Fisher Scientific); C + – Positive control (wild-type gDNA for 16S rRNA and pSB1A2-E0240 for *gfp*); C - – Negative control (no template); - RT – PCRs performed using RNA as template; + RT – PCRs performed using cDNA as template. For details see Online Methods.

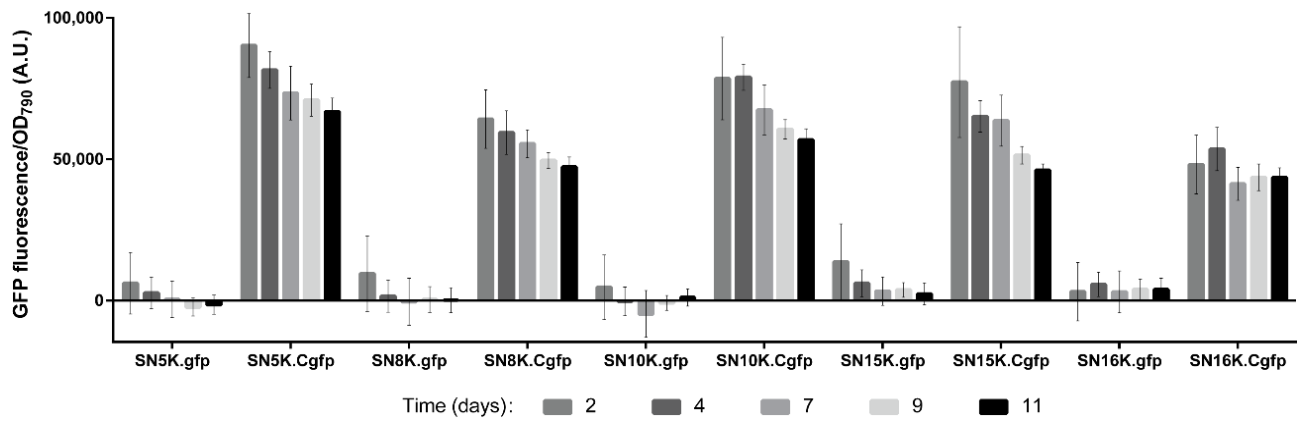

**Supplementary Figure S32.** Detection of GFP expression in *Synechocystis* mutants harboring a promoterless *gfp* synthetic module (SNnK.gfp) or a module with *gfp* under the control of a synthetic constitutive promoter (SNnK.Cgfp). Total cell fluorescence was measured 2, 4, 7, 9 and 11 days after inoculation, using 200  $\mu$ L of three independent culture replicates. Measurements were performed in triplicate and fluorescence was normalized to OD<sub>790</sub>. Normalized fluorescence from the wild-type was used as baseline. Bars indicate mean  $\pm$  s.d.

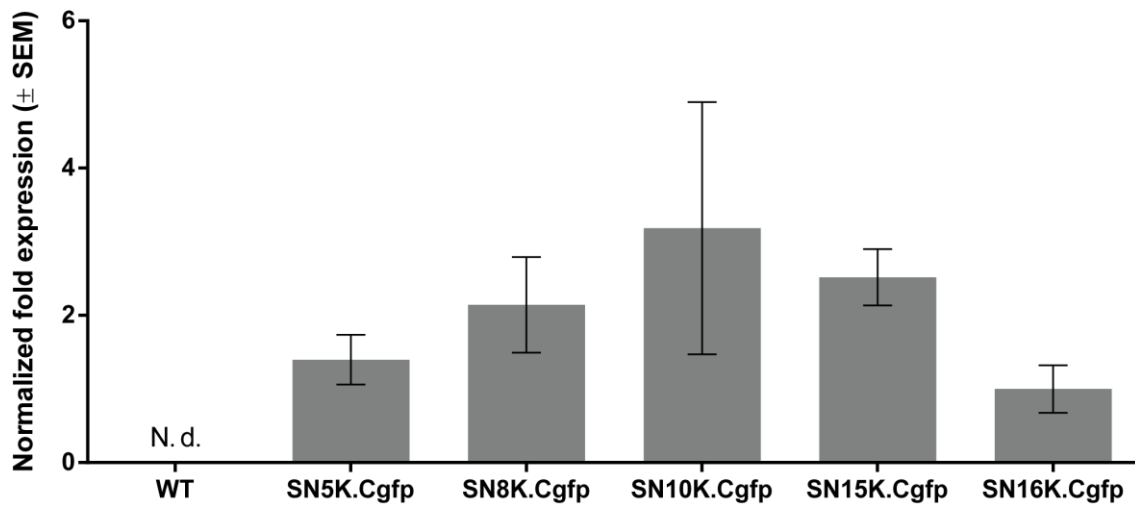

**Supplementary Figure S33.** Normalized fold expression of *gfp* (RT-qPCR) in *Synechocystis* mutants harboring a synthetic module with *gfp* under the control of a synthetic constitutive promoter. WT – wild-type (control). Data from 3 biological replicates and 3 technical replicates were normalized against three reference genes (16S, *petB*, and *rnpB*) and error bars represent  $\pm$  s.e.m.

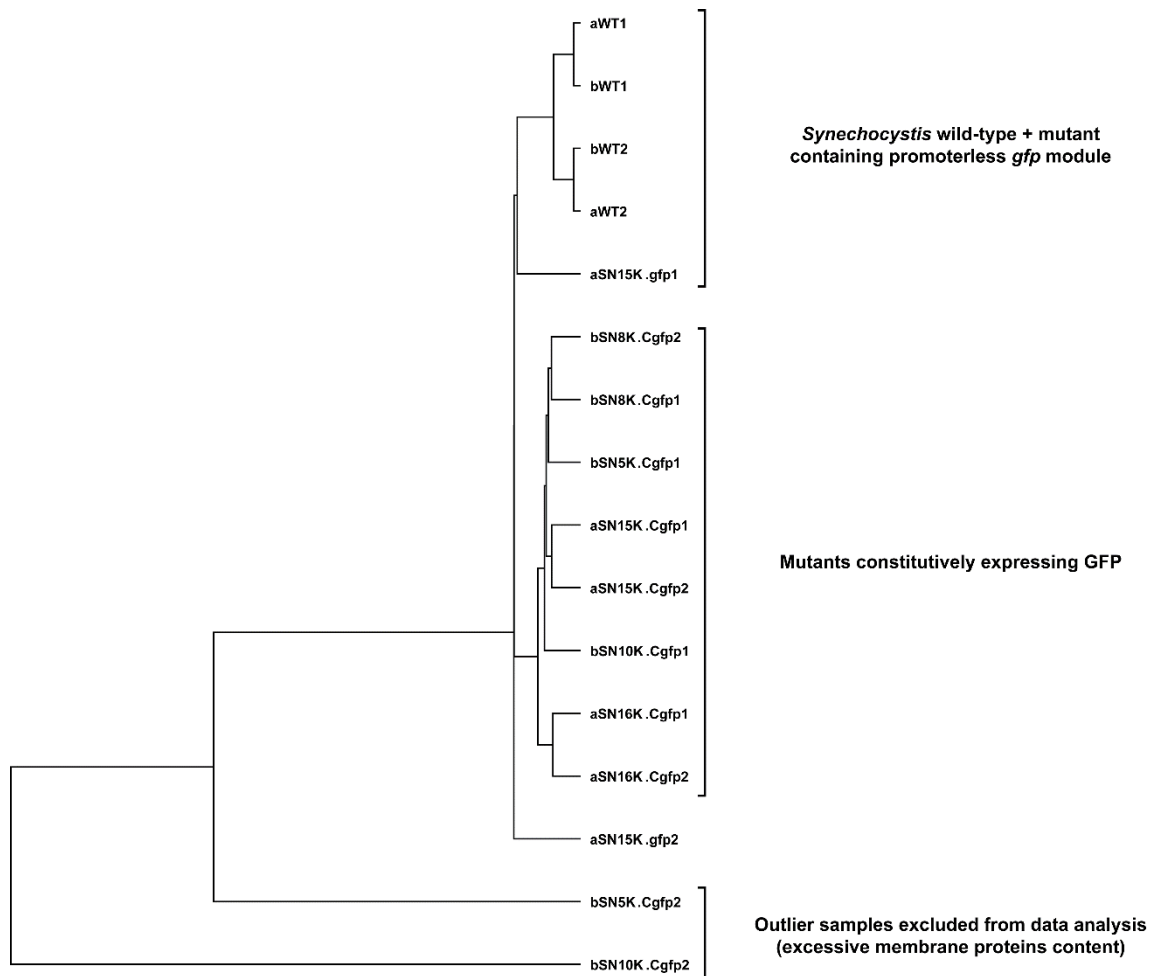

**Supplementary Figure S34.** Dendrogram plot showing the hierarchical clustering of the iTRAQ labels following the combination of the data from the two experiments. All samples beginning with “a” are from the first iTRAQ, whilst those beginning with “b” are from the second.
